# Supplementary material for: Analysis of the expression and prognostic significance of DDK complex in Hepatocarcinoma
Source: BMC Cancer. 2023 Jan 6;23:19. doi: 10.1186/s12885-022-10475-w (PMC9817372; doi:10.1186/s12885-022-10475-w)
Supplement: Supplementary file 2 — Additional file 2: Supplementary Table 1. Genes highly correlated with CDC7 in TCGA HCC database. [file 12885_2022_10475_MOESM2_ESM.xlsx]

## Sheet: lo_result_119565
Supplementary table 1. Genes highly correlated with CDC7 in TCGA HCC database
Symbol	Pearson Correlation Coefficient	P-value	FDR (BH)	Event_SD	Event_TD
CDC7	1	1e-81	1e-77	371	371
CDC6	0.791292	7.64092e-81	7.61112e-77	371	371
UHRF1	0.790545	1.36928e-80	9.09293e-77	371	371
HELLS	0.780286	3.25976e-77	1.62352e-73	371	371
STIL	0.777657	2.23577e-76	8.9082e-73	371	371
KIF18B	0.774609	2.01564e-75	6.20321e-72	371	371
LMNB1	0.7745	2.17962e-75	6.20321e-72	371	371
KNTC1	0.773252	5.30871e-75	1.322e-71	371	371
KIF23	0.773059	6.09024e-75	1.34811e-71	371	371
MCM10	0.768411	1.58956e-73	3.16672e-70	371	370
WDHD1	0.767455	3.07943e-73	5.57713e-70	371	371
MCM6	0.764986	1.67632e-72	2.68705e-69	371	371
RAD54L	0.76492	1.75342e-72	2.68705e-69	371	371
ZWINT	0.763598	4.30259e-72	6.12258e-69	371	371
WDR76	0.763001	6.44462e-72	8.55931e-69	371	371
E2F2	0.758579	1.23521e-70	1.53799e-67	371	371
POLQ	0.757443	2.61037e-70	2.87934e-67	371	370
GINS1	0.757405	2.67647e-70	2.87934e-67	371	371
ORC1L	0.757366	2.74608e-70	2.87934e-67	371	371
KIAA1524	0.756242	5.73117e-70	5.70882e-67	371	371
DEPDC1	0.754623	1.64407e-69	1.55968e-66	371	371
MCM2	0.751946	9.21176e-69	8.34167e-66	371	371
CLSPN	0.750802	1.9112e-68	1.65543e-65	371	363
TOP2A	0.749062	5.75658e-68	4.77844e-65	371	371
FAM72B	0.747758	1.30776e-67	1.04213e-64	371	371
CENPE	0.745234	6.30816e-67	4.83351e-64	371	371
DNMT1	0.74472	8.67431e-67	6.40035e-64	371	371
KIF11	0.744336	1.09972e-66	7.82454e-64	371	371
CDCA8	0.74421	1.18824e-66	8.16278e-64	371	371
GPSM2	0.743666	1.66129e-66	1.10321e-63	371	371
PLK4	0.743576	1.75609e-66	1.12854e-63	371	371
EZH2	0.742392	3.63077e-66	2.26038e-63	371	371
E2F7	0.741858	5.02927e-66	3.03615e-63	371	370
KIF4A	0.741531	6.13956e-66	3.59742e-63	371	371
ARHGAP11A	0.741028	8.34197e-66	4.74825e-63	371	371
CHAF1B	0.740791	9.62957e-66	5.3289e-63	371	371
E2F8	0.739157	2.58805e-65	1.39349e-62	371	370
SGOL1	0.738973	2.89022e-65	1.51523e-62	371	369
BUB1B	0.738857	3.10024e-65	1.58367e-62	371	371
GTSE1	0.738102	4.87851e-65	2.42974e-62	371	371
CEP55	0.736687	1.13679e-64	5.52371e-62	371	371
NDC80	0.736274	1.45355e-64	6.89465e-62	371	371
FANCD2	0.734932	3.22082e-64	1.49221e-61	371	371
KIF18A	0.733901	5.91667e-64	2.67891e-61	371	371
KIF2C	0.732848	1.09717e-63	4.85731e-61	371	371
CENPK	0.732398	1.42804e-63	6.0674e-61	371	370
DTL	0.732394	1.43142e-63	6.0674e-61	371	371
C15orf42	0.731963	1.84043e-63	7.63855e-61	371	371
ORC6L	0.730328	4.75801e-63	1.93447e-60	371	371
MKI67	0.729647	7.05455e-63	2.81082e-60	371	371
FOXM1	0.729386	8.20082e-63	3.20347e-60	371	371
CDC25A	0.728175	1.64484e-62	6.30163e-60	371	371
TYMS	0.72641	4.50794e-62	1.69448e-59	371	371
FAM72D	0.725707	6.7193e-62	2.47892e-59	371	370
CDK1	0.723768	2.00858e-61	7.27545e-59	371	371
ERCC6L	0.722809	3.44077e-61	1.22405e-58	371	371
TPX2	0.722678	3.70057e-61	1.29338e-58	371	371
NUSAP1	0.721993	5.42779e-61	1.86435e-58	371	371
NCAPG	0.71996	1.67896e-60	5.66918e-58	371	371
WDR62	0.718351	4.07289e-60	1.35234e-57	371	371
RAD51AP1	0.717934	5.12135e-60	1.67258e-57	371	371
ATAD5	0.717521	6.41894e-60	2.06255e-57	371	371
CDC45	0.716766	9.69845e-60	3.06686e-57	371	371
SGOL2	0.716561	1.08433e-59	3.3753e-57	371	371
MELK	0.716527	1.10486e-59	3.38632e-57	371	371
PLK1	0.716123	1.37608e-59	4.15367e-57	371	371
KIF15	0.716027	1.45037e-59	4.31258e-57	371	371
TCF19	0.714242	3.81129e-59	1.1166e-56	371	371
PHF19	0.713818	4.79013e-59	1.38303e-56	371	371
ANLN	0.713075	7.14392e-59	2.03316e-56	371	371
ECT2	0.713022	7.34758e-59	2.06167e-56	371	371
XRCC2	0.712896	7.86096e-59	2.17509e-56	371	367
TTK	0.712389	1.03173e-58	2.81564e-56	371	371
RAD51	0.71038	3.00946e-58	8.10195e-56	371	371
FANCI	0.709858	3.96928e-58	1.05435e-55	371	371
ASF1B	0.70957	4.62177e-58	1.21151e-55	371	371
DLGAP5	0.708562	7.86474e-58	2.03482e-55	371	371
HJURP	0.707792	1.17909e-57	3.01151e-55	371	371
NCAPH	0.707494	1.37867e-57	3.4767e-55	371	371
CDCA2	0.706454	2.37442e-57	5.91291e-55	371	371
SHCBP1	0.704988	5.09093e-57	1.25212e-54	371	371
CENPA	0.704531	6.44915e-57	1.56683e-54	371	370
RFC4	0.703925	8.82159e-57	2.11739e-54	371	371
PRC1	0.702762	1.60606e-56	3.80903e-54	371	371
EXO1	0.702626	1.72259e-56	4.03735e-54	371	371
BUB1	0.702587	1.75719e-56	4.07056e-54	371	371
FBXO5	0.69993	6.82178e-56	1.56211e-53	371	371
RRM2	0.699418	8.8464e-56	2.00271e-53	371	371
CDC20	0.698364	1.5071e-55	3.37354e-53	371	371
SKA1	0.698308	1.5501e-55	3.40859e-53	371	371
SMC4	0.698299	1.55698e-55	3.40859e-53	371	371
C6orf167	0.697812	1.99071e-55	4.31076e-53	371	371
C4orf46	0.697159	2.7642e-55	5.92132e-53	371	371
CCDC99	0.696974	3.03288e-55	6.42776e-53	371	371
CKAP2L	0.695674	5.80964e-55	1.21831e-52	371	370
NUF2	0.693426	1.77444e-54	3.68233e-52	371	371
CCNE2	0.692787	2.43204e-54	4.99496e-52	371	371
FANCB	0.692527	2.76449e-54	5.61981e-52	371	364
SKA3	0.692105	3.40252e-54	6.84697e-52	371	371
CDCA5	0.691665	4.22294e-54	8.41295e-52	371	371
CCNF	0.688513	1.96448e-53	3.87488e-51	371	371
TACC3	0.687682	2.93604e-53	5.73449e-51	371	371
KIFC1	0.686642	4.8459e-53	9.37281e-51	371	371
MYBL2	0.686205	5.97829e-53	1.14519e-50	371	371
CENPI	0.686077	6.35616e-53	1.20598e-50	371	362
NCAPG2	0.685146	9.92678e-53	1.86567e-50	371	371
TRIP13	0.685057	1.03596e-52	1.92882e-50	371	371
KIF20A	0.682585	3.35542e-52	6.1895e-50	371	371
TROAP	0.682502	3.48858e-52	6.3761e-50	371	371
FEN1	0.682172	4.07872e-52	7.38694e-50	371	371
HMGB2	0.681324	6.0825e-52	1.09167e-49	371	371
PIF1	0.680218	1.0227e-51	1.81913e-49	371	371
E2F1	0.679417	1.48707e-51	2.62172e-49	371	371
MAD2L1	0.678928	1.86885e-51	3.2659e-49	371	371
KIAA0101	0.677705	3.30045e-51	5.71753e-49	371	371
BRCA1	0.677293	3.99485e-51	6.86081e-49	371	371
FAM111B	0.677192	4.18612e-51	7.12786e-49	371	371
CCNB2	0.676262	6.43497e-51	1.08642e-48	371	371
CENPF	0.676123	6.85816e-51	1.14814e-48	371	371
ESCO2	0.673934	1.87356e-50	3.11042e-48	371	371
GINS3	0.672404	3.76319e-50	6.19589e-48	371	371
WHSC1	0.672221	4.08808e-50	6.67564e-48	371	371
HMMR	0.671958	4.60808e-50	7.46358e-48	371	371
STMN1	0.670707	8.11418e-50	1.30364e-47	371	371
FAM54A	0.669223	1.5826e-49	2.52228e-47	371	370
FAM72A	0.668826	1.89027e-49	2.98873e-47	371	356
KIF14	0.667838	2.94111e-49	4.61361e-47	371	371
C11orf84	0.667057	4.16432e-49	6.48138e-47	371	371
CIT	0.66605	6.51431e-49	1.00603e-46	371	371
FANCG	0.665835	7.16627e-49	1.0982e-46	371	371
USP1	0.664379	1.36259e-48	2.07218e-46	371	371
MTF2	0.663848	1.72124e-48	2.59776e-46	371	371
OIP5	0.663711	1.82823e-48	2.7385e-46	371	371
C16orf59	0.662998	2.50002e-48	3.71682e-46	371	371
PBK	0.662862	2.65316e-48	3.91528e-46	371	371
SPC25	0.662657	2.90225e-48	4.25137e-46	371	371
C16orf75	0.662314	3.37067e-48	4.90149e-46	371	371
TUBA1B	0.66196	3.93395e-48	5.67915e-46	371	371
BLM	0.661483	4.84354e-48	6.94194e-46	371	371
CCNB1	0.661098	5.72783e-48	8.1507e-46	371	371
DCLRE1B	0.660491	7.45571e-48	1.05342e-45	371	371
XRCC3	0.660346	7.93763e-48	1.11362e-45	371	371
CCNA2	0.660148	8.65028e-48	1.20511e-45	371	371
SPAG5	0.659791	1.0098e-47	1.39703e-45	371	371
NASP	0.659738	1.03303e-47	1.41931e-45	371	371
C12orf32	0.658809	1.54324e-47	2.10578e-45	371	371
RTKN2	0.657917	2.26526e-47	3.06996e-45	371	366
GSG2	0.65706	3.27099e-47	4.40301e-45	371	369
MCM3	0.656697	3.82047e-47	5.10814e-45	371	371
CENPL	0.656333	4.46344e-47	5.92805e-45	371	371
TMEM194A	0.654958	8.01565e-47	1.05754e-44	371	371
MCM4	0.654824	8.48504e-47	1.1121e-44	371	371
NEK2	0.654805	8.55566e-47	1.11402e-44	371	371
C1orf135	0.654765	8.70122e-47	1.12562e-44	371	371
C12orf48	0.65452	9.65235e-47	1.24061e-44	371	371
KIAA1841	0.654128	1.13966e-46	1.4554e-44	371	371
RACGAP1	0.654094	1.15627e-46	1.46721e-44	371	371
NCAPD2	0.653642	1.39992e-46	1.76514e-44	371	371
DBF4	0.653118	1.74686e-46	2.18874e-44	371	371
GINS4	0.651732	3.12911e-46	3.89613e-44	371	371
CENPH	0.650589	5.04854e-46	6.24701e-44	371	371
DEPDC1B	0.650396	5.47391e-46	6.73156e-44	371	370
RIBC2	0.649415	8.23743e-46	1.00679e-43	371	347
CDCA4	0.649324	8.55284e-46	1.03896e-43	371	371
NAA40	0.648222	1.35141e-45	1.63168e-43	371	371
NEIL3	0.647871	1.56242e-45	1.87509e-43	371	368
CDK2	0.647726	1.6592e-45	1.97932e-43	371	371
UBE2T	0.645579	4.01484e-45	4.76093e-43	371	371
KPNA2	0.644974	5.14472e-45	6.06468e-43	371	371
EME1	0.64469	5.77679e-45	6.76972e-43	371	371
CENPM	0.644061	7.4675e-45	8.69985e-43	371	371
RBL1	0.642033	1.70151e-44	1.97078e-42	371	371
UBE2C	0.638709	6.47791e-44	7.45971e-42	371	371
CDCA3	0.638461	7.15037e-44	8.18676e-42	371	371
CDKN3	0.636288	1.69687e-43	1.93172e-41	371	371
CDC25C	0.636226	1.73898e-43	1.96841e-41	371	371
MLF1IP	0.635137	2.67484e-43	3.01063e-41	371	371
DSN1	0.634838	3.0092e-43	3.36794e-41	371	371
POLD3	0.633284	5.54057e-43	6.16643e-41	371	371
ASPM	0.629945	2.03285e-42	2.24991e-40	371	371
MCM5	0.629756	2.18678e-42	2.40691e-40	371	371
CDT1	0.629508	2.40678e-42	2.6345e-40	371	371
C17orf53	0.629434	2.47674e-42	2.69626e-40	371	371
MYB	0.629159	2.75435e-42	2.98219e-40	371	357
CBX1	0.627653	4.91581e-42	5.29366e-40	371	371
CEP78	0.626731	7.00015e-42	7.49769e-40	371	371
CCNE1	0.626343	8.11962e-42	8.65022e-40	371	371
CASP2	0.625886	9.66382e-42	1.02406e-39	371	371
FBXO43	0.625645	1.05942e-41	1.11671e-39	371	370
DBF4B	0.625564	1.09244e-41	1.14545e-39	371	371
C5orf34	0.625404	1.16128e-41	1.21126e-39	371	371
MSH2	0.625165	1.27198e-41	1.31981e-39	371	371
ARHGAP11B	0.62442	1.68768e-41	1.74207e-39	371	338
DONSON	0.623671	2.24091e-41	2.3012e-39	371	371
H2AFZ	0.623324	2.55552e-41	2.61082e-39	371	371
C11orf82	0.622609	3.347e-41	3.40198e-39	371	371
EPR1	0.622493	3.49563e-41	3.53502e-39	371	368
KIF20B	0.621752	4.61935e-41	4.64781e-39	371	371
POLA2	0.621069	5.96802e-41	5.97462e-39	371	371
MCM8	0.621021	6.07769e-41	6.05399e-39	371	371
CCDC18	0.619784	9.6472e-41	9.56176e-39	371	371
RFC5	0.619315	1.14936e-40	1.13354e-38	371	371
C9orf100	0.617712	2.08391e-40	2.04511e-38	371	371
PCNA	0.6161	3.7777e-40	3.68918e-38	371	371
POLA1	0.616055	3.84025e-40	3.71907e-38	371	371
S100PBP	0.616052	3.84564e-40	3.71907e-38	371	371
SASS6	0.615872	4.10771e-40	3.95332e-38	371	371
RNF34	0.613135	1.11853e-39	1.07132e-37	371	371
TOPBP1	0.612808	1.25967e-39	1.20072e-37	371	371
TIMELESS	0.610683	2.72098e-39	2.58131e-37	371	371
C21orf58	0.610395	3.01912e-39	2.85057e-37	371	371
SFPQ	0.608921	5.12947e-39	4.82025e-37	371	371
FANCE	0.608522	5.91708e-39	5.53428e-37	371	371
BIRC5	0.608304	6.39769e-39	5.95583e-37	371	371
SPATS2	0.607516	8.47993e-39	7.85754e-37	371	371
DDX12	0.604999	2.07406e-38	1.91294e-36	371	371
CHEK1	0.604416	2.54846e-38	2.33965e-36	371	371
ZWILCH	0.603874	3.08502e-38	2.81926e-36	371	371
TUBG1	0.603796	3.17147e-38	2.88503e-36	371	371
PKMYT1	0.603102	4.04911e-38	3.66665e-36	371	371
AURKB	0.602612	4.80786e-38	4.33404e-36	371	371
RBBP8	0.600126	1.14591e-37	1.02833e-35	371	371
RELT	0.599915	1.23295e-37	1.10148e-35	371	371
SMARCD1	0.599804	1.2813e-37	1.13955e-35	371	371
HAUS1	0.598117	2.29869e-37	2.03531e-35	371	371
CHAF1A	0.597654	2.69688e-37	2.37731e-35	371	371
PRR11	0.597482	2.86096e-37	2.51084e-35	371	344
CENPW	0.596774	3.65075e-37	3.18992e-35	371	371
NUP210	0.596159	4.50938e-37	3.92297e-35	371	371
MCM7	0.595443	5.76238e-37	4.99123e-35	371	371
PTTG1	0.594391	8.25038e-37	7.11533e-35	371	371
MYBL1	0.593002	1.32314e-36	1.13619e-34	371	371
NRM	0.591469	2.22249e-36	1.90028e-34	371	371
GPR19	0.590493	3.08688e-36	2.62807e-34	371	369
TTF2	0.590086	3.53949e-36	3.00058e-34	371	371
CEP152	0.585615	1.56982e-35	1.32516e-33	371	371
TRIM59	0.585387	1.6927e-35	1.42287e-33	371	370
C18orf54	0.584911	1.98032e-35	1.65764e-33	371	370
KIF24	0.584501	2.26729e-35	1.88991e-33	371	371
PRPF38A	0.582507	4.36149e-35	3.6204e-33	371	371
MTBP	0.581494	6.07114e-35	5.01864e-33	371	371
ESPL1	0.580183	9.29798e-35	7.65431e-33	371	371
RAD1	0.577133	2.48792e-34	2.03969e-32	371	371
ASRGL1	0.574738	5.34976e-34	4.36795e-32	371	371
POLE2	0.573939	6.89854e-34	5.6095e-32	371	371
SPIN4	0.573043	9.16357e-34	7.421e-32	371	371
TRAIP	0.572253	1.17631e-33	9.48763e-32	371	371
RNASEH2A	0.57224	1.18125e-33	9.48902e-32	371	371
LMNB2	0.571493	1.49495e-33	1.19608e-31	371	371
CDC25B	0.570819	1.84792e-33	1.47257e-31	371	371
ANKRD32	0.5697	2.62472e-33	2.08325e-31	371	371
HAUS6	0.569577	2.72751e-33	2.15625e-31	371	371
CENPQ	0.569154	3.11344e-33	2.45161e-31	371	371
TIPIN	0.569006	3.26056e-33	2.55735e-31	371	371
KIF4B	0.568884	3.38679e-33	2.64595e-31	371	352
SMC2	0.568673	3.61788e-33	2.81544e-31	371	371
DR1	0.568066	4.37065e-33	3.38802e-31	371	371
SENP1	0.567048	5.99729e-33	4.63093e-31	371	371
RRM1	0.565879	8.61155e-33	6.62391e-31	371	371
POLD1	0.565741	8.98455e-33	6.88424e-31	371	371
RCC2	0.564502	1.31611e-32	1.00458e-30	371	371
LIG1	0.56321	1.95644e-32	1.48764e-30	371	371
MYO19	0.562601	2.35694e-32	1.78536e-30	371	371
ARHGAP33	0.561691	3.11069e-32	2.34739e-30	371	371
GINS2	0.560984	3.85705e-32	2.89963e-30	371	371
DNA2	0.560394	4.61382e-32	3.45551e-30	371	371
VRK1	0.560186	4.91418e-32	3.66667e-30	371	371
PSIP1	0.559814	5.50066e-32	4.08896e-30	371	371
SUV39H2	0.559609	5.85206e-32	4.334e-30	371	371
NDE1	0.558609	7.91487e-32	5.84e-30	371	371
C4orf21	0.558151	9.08548e-32	6.679e-30	371	371
CKS2	0.557865	9.89973e-32	7.25082e-30	371	371
PRKCI	0.557782	1.01517e-31	7.40814e-30	371	371
ARHGEF2	0.557752	1.0244e-31	7.44821e-30	371	371
CPSF6	0.556775	1.3731e-31	9.94725e-30	371	371
PDE7A	0.555985	1.73902e-31	1.25524e-29	371	371
DMC1	0.55594	1.76274e-31	1.26778e-29	371	328
SFRS2	0.555799	1.83852e-31	1.31752e-29	371	371
CNTNAP1	0.555623	1.93786e-31	1.38373e-29	371	371
PAQR4	0.55372	3.41223e-31	2.4278e-29	371	371
SPC24	0.553645	3.48888e-31	2.4735e-29	371	366
ALS2CR4	0.551986	5.69808e-31	4.01121e-29	371	371
RECQL4	0.550716	8.27596e-31	5.80541e-29	371	371
CKAP2	0.550657	8.42136e-31	5.88668e-29	371	371
NEDD1	0.550006	1.01931e-30	7.10023e-29	371	371
NUP188	0.549498	1.18244e-30	8.20786e-29	371	371
FIGNL1	0.548932	1.39485e-30	9.64871e-29	371	371
NUP205	0.548769	1.46304e-30	1.00854e-28	371	371
NUP107	0.548051	1.80282e-30	1.23847e-28	371	371
IQGAP3	0.548002	1.82904e-30	1.25217e-28	371	371
PRIM2	0.547893	1.88773e-30	1.28792e-28	371	371
AURKAPS1	0.547516	2.10615e-30	1.43204e-28	371	367
METTL4	0.547335	2.21999e-30	1.50431e-28	371	371
CENPJ	0.545371	3.91689e-30	2.64517e-28	371	371
C10orf78	0.545299	3.99914e-30	2.69158e-28	371	371
PSRC1	0.545097	4.23981e-30	2.84396e-28	371	371
EXOG	0.544502	5.03078e-30	3.35195e-28	371	371
BRPF1	0.543587	6.54094e-30	4.34362e-28	371	371
INCENP	0.54346	6.78273e-30	4.48922e-28	371	371
C21orf45	0.543318	7.06429e-30	4.66009e-28	371	371
TRIM45	0.541442	1.2069e-29	7.93529e-28	371	371
CCDC14	0.541092	1.33303e-29	8.73574e-28	371	371
CENPO	0.540156	1.73859e-29	1.13561e-27	371	368
SRRT	0.539544	2.06733e-29	1.34592e-27	371	371
YEATS2	0.539037	2.38518e-29	1.54781e-27	371	371
H2AFX	0.537975	3.21675e-29	2.08065e-27	371	371
DDX11	0.537751	3.42609e-29	2.20889e-27	371	371
BRCA2	0.537651	3.52331e-29	2.26423e-27	371	368
CKAP5	0.537489	3.68738e-29	2.36206e-27	371	371
IKBIP	0.536655	4.65924e-29	2.97505e-27	371	371
SFRS1	0.535669	6.13752e-29	3.90644e-27	371	371
CHTF18	0.535488	6.45596e-29	4.09604e-27	371	371
SMC1B	0.53485	7.71092e-29	4.87673e-27	371	320
SUZ12	0.534582	8.30773e-29	5.23755e-27	371	371
DIAPH3	0.533497	1.12268e-28	7.05554e-27	371	371
C3orf34	0.533481	1.1277e-28	7.06478e-27	371	371
RDM1	0.533113	1.24853e-28	7.79727e-27	371	349
FAM40B	0.532812	1.35684e-28	8.44719e-27	371	371
H2AFY	0.53199	1.70266e-28	1.05671e-26	371	371
SLBP	0.530932	2.27776e-28	1.40924e-26	371	371
FSD1L	0.530239	2.75473e-28	1.69906e-26	371	370
LOC647946	0.530195	2.788e-28	1.71428e-26	371	276
LOC399815	0.529876	3.04294e-28	1.86528e-26	371	284
RNFT2	0.528065	4.98706e-28	3.03829e-26	371	370
NFKBIL2	0.527622	5.62607e-28	3.41715e-26	371	371
TDG	0.526708	7.20806e-28	4.36471e-26	371	371
IFT80	0.525937	8.88136e-28	5.34545e-26	371	371
PASK	0.525581	9.77712e-28	5.86686e-26	371	371
MPP2	0.525514	9.95612e-28	5.95633e-26	371	354
CCDC88A	0.525316	1.04996e-27	6.26268e-26	371	371
DNAJC9	0.524428	1.33377e-27	7.93174e-26	371	371
C2orf48	0.523205	1.85127e-27	1.09765e-25	371	328
ZNF107	0.521973	2.57344e-27	1.52131e-25	371	370
SUZ12P	0.521117	3.23174e-27	1.90481e-25	371	371
DZIP1L	0.520991	3.34187e-27	1.96392e-25	371	369
DSCC1	0.520341	3.97129e-27	2.32694e-25	371	371
C13orf34	0.519629	4.79492e-27	2.8013e-25	371	371
TET1	0.519531	4.92119e-27	2.86666e-25	371	371
LOC100128191	0.519416	5.07329e-27	2.94665e-25	371	371
IQCB1	0.51874	6.06526e-27	3.50238e-25	371	371
PRIM1	0.517405	8.61916e-27	4.94844e-25	371	370
ILF3	0.517382	8.67065e-27	4.9637e-25	371	371
PSMC3IP	0.517128	9.26766e-27	5.29027e-25	371	371
C9orf140	0.516208	1.17942e-26	6.71324e-25	371	371
NCAPD3	0.516176	1.18933e-26	6.75036e-25	371	371
ZNF93	0.515722	1.33907e-26	7.5787e-25	371	366
LOC81691	0.515063	1.59044e-26	8.97587e-25	371	371
CDKN2C	0.513991	2.10165e-26	1.17941e-24	371	371
RAD54B	0.5138	2.20848e-26	1.23588e-24	371	371
FAM111A	0.513346	2.48492e-26	1.38668e-24	371	371
KPNB1	0.513038	2.69112e-26	1.49339e-24	371	371
LOC339674	0.512827	2.84211e-26	1.57279e-24	371	279
CCDC43	0.512627	2.99243e-26	1.65139e-24	371	371
GLMN	0.512506	3.08813e-26	1.6995e-24	371	371
SMCHD1	0.511831	3.67562e-26	2.01724e-24	371	371
PTTG3P	0.51098	4.57555e-26	2.49737e-24	371	296
MASTL	0.510706	4.90984e-26	2.67251e-24	371	371
MMD	0.510663	4.96377e-26	2.6945e-24	371	371
HSPA14	0.510395	5.31794e-26	2.87111e-24	371	371
NRAS	0.510186	5.61019e-26	3.02071e-24	371	371
CDC14A	0.509875	6.07536e-26	3.25599e-24	371	371
MSH6	0.509873	6.07985e-26	3.25599e-24	371	371
CCDC109B	0.509385	6.88855e-26	3.67161e-24	371	370
EPB41L2	0.509382	6.89279e-26	3.67161e-24	371	371
WDR67	0.508555	8.5154e-26	4.52384e-24	371	371
SAE1	0.508155	9.42907e-26	4.9959e-24	371	371
SART3	0.508133	9.48181e-26	5.01052e-24	371	371
DNMT3B	0.50779	1.03454e-25	5.45242e-24	371	371
TK1	0.507543	1.10165e-25	5.77556e-24	371	371
C15orf23	0.507477	1.12035e-25	5.85817e-24	371	371
ZNF367	0.507222	1.19535e-25	6.21769e-24	371	371
LOC374443	0.506501	1.43502e-25	7.44491e-24	371	371
SH3BP1	0.506402	1.47161e-25	7.61493e-24	371	371
TFDP1	0.505865	1.68585e-25	8.67842e-24	371	371
GPD2	0.50527	1.95886e-25	1.00578e-23	371	371
RHEBL1	0.505212	1.98817e-25	1.01821e-23	371	371
MTA2	0.505199	1.99475e-25	1.01896e-23	371	371
RAD51L3	0.504943	2.12764e-25	1.08406e-23	371	371
AURKA	0.504274	2.51799e-25	1.27968e-23	371	371
DDHD1	0.504005	2.69412e-25	1.36571e-23	371	371
MCOLN3	0.503186	3.30839e-25	1.6686e-23	371	312
IGSF3	0.502473	3.95468e-25	1.98952e-23	371	371
PHTF2	0.50203	4.41707e-25	2.21634e-23	371	371
ABI2	0.502002	4.44812e-25	2.21634e-23	371	371
QSER1	0.501992	4.4594e-25	2.21634e-23	371	371
ABCC5	0.501991	4.46038e-25	2.21634e-23	371	371
E2F3	0.501991	4.46117e-25	2.21634e-23	371	371
ZNF207	0.500852	5.92443e-25	2.9287e-23	371	371
KIAA1949	0.500661	6.21291e-25	3.0637e-23	371	371
HAUS5	0.500552	6.38254e-25	3.13958e-23	371	371
FAM102B	0.500277	6.83342e-25	3.35309e-23	371	371
PRPF38B	0.499665	7.95431e-25	3.89351e-23	371	371
TMEM201	0.499245	8.82564e-25	4.29888e-23	371	371
AZI1	0.498715	1.00609e-24	4.88862e-23	371	371
DDX55	0.498251	1.12797e-24	5.46748e-23	371	371
RFWD3	0.498201	1.14216e-24	5.52285e-23	371	371
CDCA7	0.497957	1.21281e-24	5.85027e-23	371	370
LIN9	0.497504	1.35571e-24	6.52379e-23	371	371
IL12A	0.49711	1.4936e-24	7.16999e-23	371	331
CCDC163P	0.496536	1.71942e-24	8.23421e-23	371	352
NUP43	0.496281	1.83042e-24	8.74477e-23	371	371
HNRNPA3	0.49622	1.85792e-24	8.85492e-23	371	371
RAET1K	0.495728	2.09566e-24	9.96412e-23	371	286
C20orf72	0.495603	2.16104e-24	1.02505e-22	371	371
MDM1	0.49453	2.80717e-24	1.32837e-22	371	371
RBM14	0.49317	3.90702e-24	1.84445e-22	371	371
C1orf96	0.493047	4.02506e-24	1.89121e-22	371	371
CNOT6	0.49216	4.98893e-24	2.33858e-22	371	371
WASF1	0.491548	5.78255e-24	2.70422e-22	371	371
PPIL5	0.490701	7.09108e-24	3.3084e-22	371	371
NUP85	0.490224	7.95242e-24	3.6897e-22	371	371
ZNF37B	0.490218	7.96392e-24	3.6897e-22	371	371
HSF2	0.489845	8.71081e-24	4.02637e-22	371	371
PPHLN1	0.488773	1.12581e-23	5.19177e-22	371	371
SMPDL3B	0.488172	1.29937e-23	5.97832e-22	371	350
PKIA	0.488144	1.30835e-23	6.00574e-22	371	326
CEP135	0.487307	1.59698e-23	7.31378e-22	371	371
TRAFD1	0.487129	1.66596e-23	7.61223e-22	371	371
DEM1	0.487053	1.69623e-23	7.7328e-22	371	371
FBF1	0.48697	1.73001e-23	7.86879e-22	371	371
RBM12B	0.485158	2.65692e-23	1.20572e-21	371	371
KIAA1009	0.485143	2.66686e-23	1.20748e-21	371	371
PFKFB4	0.485051	2.72491e-23	1.23097e-21	371	371
TCERG1	0.484541	3.07342e-23	1.38214e-21	371	371
HNRNPL	0.483484	3.94164e-23	1.76859e-21	371	371
UBE2S	0.483375	4.04388e-23	1.81039e-21	371	371
KIAA1731	0.48322	4.19369e-23	1.87324e-21	371	371
OTUD3	0.48312	4.29278e-23	1.91322e-21	371	371
SLC25A19	0.482662	4.77917e-23	2.12524e-21	371	371
RFC3	0.482466	5.00425e-23	2.22037e-21	371	371
BRIP1	0.48232	5.17783e-23	2.2872e-21	371	368
FAM81A	0.482258	5.25341e-23	2.31545e-21	371	367
HNRNPH1	0.481826	5.81119e-23	2.55564e-21	371	371
ZNF519	0.481523	6.23791e-23	2.73726e-21	371	367
TMPO	0.481196	6.73178e-23	2.94748e-21	371	371
MGC12982	0.481115	6.85941e-23	2.99678e-21	371	371
RUSC1	0.480776	7.423e-23	3.23591e-21	371	371
GPR120	0.480262	8.36546e-23	3.63879e-21	371	273
SETD8	0.480119	8.64933e-23	3.75407e-21	371	371
NUP62	0.479921	9.05678e-23	3.92237e-21	371	371
IGF2BP3	0.479889	9.12252e-23	3.94227e-21	371	371
RAD51C	0.47927	1.05326e-22	4.52223e-21	371	371
BARD1	0.479123	1.08951e-22	4.66779e-21	371	347
KDELC2	0.479086	1.09889e-22	4.69788e-21	371	371
C14orf106	0.478948	1.13467e-22	4.84047e-21	371	371
TRA2B	0.47854	1.24693e-22	5.30798e-21	371	371
ATP8B2	0.478447	1.27408e-22	5.41197e-21	371	371
TRIM37	0.477083	1.74458e-22	7.37909e-21	371	371
SFRS13A	0.477044	1.76017e-22	7.42927e-21	371	371
CDKN2BAS	0.477032	1.76528e-22	7.43507e-21	371	353
FAM64A	0.47656	1.96747e-22	8.2692e-21	371	369
DPY19L2P2	0.476508	1.9912e-22	8.35129e-21	371	351
C19orf40	0.476467	2.00997e-22	8.41232e-21	371	371
ARNTL2	0.475698	2.39734e-22	1.00125e-20	371	366
C18orf10	0.475609	2.44674e-22	1.01975e-20	371	371
CDK4	0.475092	2.75357e-22	1.14523e-20	371	371
RAB42	0.474705	3.00805e-22	1.24847e-20	371	363
UBA2	0.474415	3.21396e-22	1.33115e-20	371	371
VANGL1	0.473604	3.86491e-22	1.59413e-20	371	371
GMPS	0.473228	4.20999e-22	1.73288e-20	371	371
STK4	0.472526	4.9364e-22	2.02769e-20	371	371
DVL3	0.471557	6.14664e-22	2.51444e-20	371	371
ACTL6A	0.471058	6.87888e-22	2.80822e-20	371	371
PGS1	0.470556	7.7021e-22	3.13786e-20	371	371
RCAN3	0.470019	8.69064e-22	3.53336e-20	371	365
PPM1M	0.4697	9.33783e-22	3.78876e-20	371	371
BEND3	0.469344	1.01143e-21	4.09546e-20	371	371
CDC27	0.469206	1.04299e-21	4.21471e-20	371	371
E2F6	0.468813	1.13903e-21	4.59347e-20	371	371
FAM116A	0.468788	1.14533e-21	4.60955e-20	371	371
CBFA2T2	0.468421	1.24346e-21	4.9944e-20	371	371
DSCR6	0.467861	1.40901e-21	5.62532e-20	371	336
NRSN2	0.467818	1.42258e-21	5.66812e-20	371	371
LEPRE1	0.467403	1.56057e-21	6.19318e-20	371	371
C1orf52	0.467336	1.58398e-21	6.27358e-20	371	371
CACNB1	0.467293	1.59928e-21	6.32162e-20	371	371
FANCM	0.466934	1.73214e-21	6.81971e-20	371	371
GAS2L3	0.466598	1.86666e-21	7.33483e-20	371	349
TRAF5	0.46625	2.0168e-21	7.90921e-20	371	371
FHOD3	0.4662	2.039e-21	7.9795e-20	371	360
PTBP2	0.466192	2.04274e-21	7.9795e-20	371	371
CEP250	0.466002	2.13064e-21	8.29034e-20	371	371
CSTF2	0.465873	2.19239e-21	8.51398e-20	371	371
RBM17	0.465452	2.40654e-21	9.32743e-20	371	371
MTMR2	0.465379	2.44622e-21	9.46282e-20	371	371
ZBTB12	0.46537	2.45099e-21	9.46291e-20	371	371
SSRP1	0.465295	2.4919e-21	9.60226e-20	371	371
CDH24	0.465113	2.59446e-21	9.95912e-20	371	371
C3orf63	0.465112	2.59451e-21	9.95912e-20	371	371
PLEKHG2	0.464866	2.73991e-21	1.04769e-19	371	371
LOC100272146	0.464841	2.75463e-21	1.0513e-19	371	371
SOAT1	0.464671	2.86054e-21	1.08963e-19	371	371
ITGB3BP	0.464649	2.87436e-21	1.09281e-19	371	371
C12orf75	0.464454	3.00049e-21	1.13859e-19	371	371
SFRS14	0.464378	3.0512e-21	1.15563e-19	371	371
SCLT1	0.464218	3.16116e-21	1.195e-19	371	371
PKM2	0.464072	3.2643e-21	1.23166e-19	371	371
RAN	0.463787	3.47565e-21	1.30645e-19	371	371
MICB	0.463635	3.59379e-21	1.34831e-19	371	371
U2AF2	0.463332	3.84178e-21	1.43865e-19	371	371
FBXO45	0.463011	4.12262e-21	1.54092e-19	371	371
CDCA7L	0.462681	4.432e-21	1.65345e-19	371	371
KIAA0907	0.461864	5.30014e-21	1.97363e-19	371	371
ROD1	0.46176	5.4222e-21	2.01532e-19	371	371
ZDHHC13	0.461474	5.77206e-21	2.14136e-19	371	371
USP24	0.461449	5.80414e-21	2.14926e-19	371	371
C1orf106	0.461181	6.1535e-21	2.27019e-19	371	367
ACRV1	0.460877	6.57631e-21	2.42169e-19	371	220
DCLRE1C	0.460737	6.77987e-21	2.49204e-19	371	371
SFRS13B	0.459734	8.43353e-21	3.08847e-19	371	368
HNRNPA2B1	0.459409	9.05031e-21	3.30826e-19	371	371
PLBD1	0.458534	1.09383e-20	3.99109e-19	371	371
HNRNPA3P1	0.458246	1.16427e-20	4.24031e-19	371	371
EP400	0.458185	1.1795e-20	4.28794e-19	371	371
TNFAIP8	0.457851	1.26798e-20	4.60123e-19	371	371
RBBP7	0.457579	1.34448e-20	4.86995e-19	371	371
ZNF273	0.457486	1.37174e-20	4.95967e-19	371	371
GPR137C	0.457301	1.42759e-20	5.15224e-19	371	371
CHML	0.457266	1.43846e-20	5.1821e-19	371	371
KIF2A	0.45719	1.46221e-20	5.25814e-19	371	371
HNRNPR	0.457026	1.51476e-20	5.43732e-19	371	371
HS2ST1	0.45657	1.67075e-20	5.98646e-19	371	371
FAM83D	0.456213	1.80406e-20	6.45249e-19	371	371
UPF3B	0.456096	1.84978e-20	6.60417e-19	371	371
ANKLE2	0.455962	1.90398e-20	6.78552e-19	371	371
C16orf93	0.455719	2.00553e-20	7.13466e-19	371	369
SALL2	0.45566	2.03135e-20	7.21364e-19	371	369
PPT1	0.455589	2.06223e-20	7.31026e-19	371	371
KIAA0226	0.455515	2.09553e-20	7.41511e-19	371	371
ARL6IP6	0.455421	2.1378e-20	7.5513e-19	371	371
RPAP3	0.454862	2.40976e-20	8.49687e-19	371	371
APAF1	0.454752	2.46667e-20	8.68215e-19	371	371
CASP8AP2	0.454677	2.5067e-20	8.80749e-19	371	371
HCFC1	0.453631	3.13308e-20	1.09841e-18	371	371
C6orf182	0.453625	3.13721e-20	1.09841e-18	371	371
MND1	0.453571	3.17336e-20	1.10912e-18	371	371
SUPT16H	0.453344	3.33056e-20	1.16202e-18	371	371
C6orf150	0.453194	3.43819e-20	1.19748e-18	371	362
C20orf117	0.453035	3.55641e-20	1.23649e-18	371	371
KHDRBS1	0.452904	3.65684e-20	1.26919e-18	371	371
ANAPC7	0.452779	3.75545e-20	1.30115e-18	371	371
COL24A1	0.452477	4.00417e-20	1.38491e-18	371	307
ZNF248	0.452338	4.12358e-20	1.42128e-18	371	371
TMEM106C	0.452117	4.32193e-20	1.48707e-18	371	371
PPP1CC	0.452082	4.35358e-20	1.49538e-18	371	371
GPRC5D	0.45128	5.15883e-20	1.76892e-18	371	342
ATXN2L	0.451181	5.26829e-20	1.80335e-18	371	371
C7orf23	0.45101	5.46197e-20	1.86644e-18	371	371
PRTFDC1	0.450886	5.60663e-20	1.90606e-18	371	371
ZNF643	0.450533	6.03948e-20	2.04276e-18	371	370
SLC2A6	0.450463	6.12955e-20	2.06971e-18	371	371
SR140	0.450404	6.20606e-20	2.092e-18	371	371
THOC1	0.450302	6.34036e-20	2.13366e-18	371	371
DNM1L	0.450104	6.61016e-20	2.2207e-18	371	371
SIP1	0.448461	9.33333e-20	3.13028e-18	371	371
MDC1	0.44839	9.47294e-20	3.17176e-18	371	371
G6PD	0.448291	9.67034e-20	3.23242e-18	371	371
ACYP1	0.448274	9.70426e-20	3.23833e-18	371	371
SCML2	0.448018	1.02386e-19	3.41092e-18	371	371
G2E3	0.44768	1.09867e-19	3.64795e-18	371	371
TAF1B	0.44762	1.11269e-19	3.68834e-18	371	371
GIT2	0.447446	1.15364e-19	3.81774e-18	371	371
GPR84	0.447238	1.20487e-19	3.98066e-18	371	328
TTC26	0.447011	1.2633e-19	4.1668e-18	371	369
DDX23	0.445939	1.57885e-19	5.19898e-18	371	371
RECQL	0.445719	1.65254e-19	5.43265e-18	371	371
TMEM48	0.445416	1.75968e-19	5.77535e-18	371	371
ACBD7	0.445293	1.80488e-19	5.91397e-18	371	369
COL9A2	0.445158	1.85606e-19	6.07166e-18	371	370
EID2B	0.444536	2.11114e-19	6.86102e-18	371	371
KCNMB3	0.444069	2.32455e-19	7.53001e-18	371	371
ZNF26	0.443859	2.42738e-19	7.85037e-18	371	371
ERI1	0.443374	2.68254e-19	8.6475e-18	371	371
CAPZA1	0.442255	3.37613e-19	1.08483e-17	371	371
PRKCD	0.4422	3.41427e-19	1.09532e-17	371	371
DENR	0.442121	3.4699e-19	1.11137e-17	371	371
C1orf83	0.441955	3.59029e-19	1.14809e-17	371	371
COMMD2	0.441902	3.62926e-19	1.15869e-17	371	371
ANKRD52	0.441793	3.71168e-19	1.1831e-17	371	371
CKAP4	0.441695	3.78633e-19	1.20497e-17	371	371
IKBKE	0.441655	3.81805e-19	1.21313e-17	371	371
C6orf147	0.441359	4.05629e-19	1.28677e-17	371	178
NUP155	0.44128	4.12189e-19	1.30551e-17	371	371
MFI2	0.441151	4.23174e-19	1.33817e-17	371	366
EED	0.441063	4.3088e-19	1.36038e-17	371	371
CXorf57	0.441034	4.3343e-19	1.36626e-17	371	371
PPP2R2B	0.440581	4.75475e-19	1.49172e-17	371	364
FAM164A	0.439649	5.74844e-19	1.79781e-17	371	371
RNF24	0.439616	5.78636e-19	1.80683e-17	371	371
HIATL1	0.439278	6.19848e-19	1.92947e-17	371	371
ZNF738	0.439037	6.50841e-19	2.01964e-17	371	371
PLOD2	0.438999	6.55896e-19	2.03216e-17	371	371
CABLES2	0.438229	7.66723e-19	2.36084e-17	371	371
CRLF3	0.438163	7.7697e-19	2.3887e-17	371	371
C1orf65	0.438119	7.83918e-19	2.40635e-17	371	158
PALB2	0.43746	8.95499e-19	2.74464e-17	371	371
CHORDC1	0.437426	9.01742e-19	2.75952e-17	371	371
PLAGL2	0.437301	9.24854e-19	2.82591e-17	371	371
TMEM194B	0.437041	9.74604e-19	2.97336e-17	371	371
ZNF878	0.436977	9.87237e-19	3.0073e-17	371	296
HEATR6	0.436455	1.09657e-18	3.33524e-17	371	371
SAP30	0.43641	1.10649e-18	3.36029e-17	371	371
IKZF4	0.436124	1.17215e-18	3.55426e-17	371	371
BCL10	0.436048	1.19006e-18	3.59764e-17	371	371
DYRK2	0.435738	1.26646e-18	3.81699e-17	371	371
MKNK1	0.435726	1.26972e-18	3.82105e-17	371	371
DUSP5P	0.435398	1.35591e-18	4.06813e-17	371	267
PAPLN	0.435149	1.42524e-18	4.26971e-17	371	371
ZMYM1	0.435112	1.43588e-18	4.29515e-17	371	371
CORO1C	0.435048	1.45446e-18	4.3442e-17	371	371
PLCB3	0.434765	1.53927e-18	4.59063e-17	371	371
NCOA5	0.434502	1.6223e-18	4.82381e-17	371	371
SSH2	0.434194	1.7254e-18	5.11508e-17	371	371
DSG2	0.434175	1.73196e-18	5.1269e-17	371	371
FAM57B	0.433836	1.85296e-18	5.47694e-17	371	308
DLEU2L	0.433759	1.8816e-18	5.55337e-17	371	303
ZBED5	0.43333	2.04967e-18	6.03154e-17	371	371
ZNF765	0.433284	2.06848e-18	6.07792e-17	371	371
CEP110	0.433234	2.08905e-18	6.12932e-17	371	371
ZSCAN20	0.432705	2.3208e-18	6.78927e-17	371	371
USP48	0.432177	2.57774e-18	7.51883e-17	371	371
RNF138	0.432054	2.64096e-18	7.69198e-17	371	371
HAUS3	0.431934	2.70494e-18	7.85536e-17	371	371
HNRNPH3	0.431858	2.7457e-18	7.96213e-17	371	371
OSBPL6	0.431544	2.92174e-18	8.44052e-17	371	369
GCNT1	0.431542	2.92338e-18	8.44052e-17	371	371
TSPAN3	0.431529	2.93083e-18	8.44977e-17	371	371
STOX1	0.431205	3.12442e-18	8.99488e-17	371	357
RASSF3	0.430581	3.53434e-18	1.01603e-16	371	364
CNPY4	0.430401	3.6621e-18	1.05124e-16	371	371
ZBTB40	0.430137	3.85814e-18	1.10434e-16	371	371
PLXNA1	0.430032	3.93826e-18	1.12565e-16	371	371
DEK	0.429995	3.9675e-18	1.13238e-16	371	371
FAM113B	0.429926	4.02173e-18	1.14622e-16	371	371
PM20D2	0.429547	4.3331e-18	1.2332e-16	371	371
CDKN2A	0.429135	4.69823e-18	1.33331e-16	371	371
ATAD2	0.428884	4.93551e-18	1.39865e-16	371	371
GNB3	0.428866	4.95286e-18	1.40157e-16	371	317
CDK16	0.428548	5.27123e-18	1.48534e-16	371	371
WDR53	0.428525	5.29528e-18	1.49001e-16	371	371
SCMH1	0.428381	5.44702e-18	1.53032e-16	371	371
ZNF257	0.428374	5.45391e-18	1.53032e-16	371	342
ZNF642	0.428355	5.47482e-18	1.53403e-16	371	371
ELOVL3	0.428001	5.86708e-18	1.63933e-16	371	285
FNBP4	0.427278	6.75753e-18	1.88285e-16	371	371
KIAA1377	0.427149	6.93057e-18	1.92836e-16	371	366
TTLL5	0.427097	7.00012e-18	1.945e-16	371	371
LAMP3	0.427058	7.05383e-18	1.95719e-16	371	371
ZNF681	0.42703	7.09332e-18	1.96541e-16	371	369
ZNF85	0.426996	7.14062e-18	1.97577e-16	371	369
DCAF16	0.426924	7.24077e-18	2.0007e-16	371	371
ELF4	0.426848	7.34916e-18	2.02784e-16	371	371
ELOVL7	0.426792	7.42959e-18	2.04546e-16	371	365
SNRNP40	0.426789	7.43355e-18	2.04546e-16	371	371
RAD9B	0.42588	8.87183e-18	2.43786e-16	371	371
TYRO3	0.4255	9.5505e-18	2.61709e-16	371	371
KIAA0528	0.425492	9.56618e-18	2.61709e-16	371	371
IFT52	0.425486	9.57665e-18	2.61709e-16	371	371
KHDC1	0.425471	9.60407e-18	2.62099e-16	371	278
CDK5R1	0.424655	1.12508e-17	3.05783e-16	371	371
SFRS11	0.424618	1.13308e-17	3.07538e-16	371	371
B3GALNT1	0.423934	1.29308e-17	3.50011e-16	371	370
BAZ2A	0.423875	1.3081e-17	3.53595e-16	371	371
SLC36A1	0.423849	1.3145e-17	3.54844e-16	371	371
EFTUD2	0.423656	1.36444e-17	3.6733e-16	371	371
YWHAQ	0.4236	1.37914e-17	3.70785e-16	371	371
C7orf68	0.423287	1.46508e-17	3.9283e-16	371	371
ZMYM4	0.422773	1.61731e-17	4.33065e-16	371	371
GIT1	0.42236	1.75083e-17	4.67561e-16	371	371
FAM110A	0.422179	1.81271e-17	4.83438e-16	371	371
IQCC	0.422141	1.82595e-17	4.86319e-16	371	371
TNFRSF11A	0.422099	1.8408e-17	4.89618e-16	371	369
STXBP4	0.421876	1.92115e-17	5.10309e-16	371	371
ACIN1	0.421677	1.9959e-17	5.29458e-16	371	371
ZNF589	0.421437	2.08949e-17	5.52814e-16	371	371
TRAF3	0.421231	2.17377e-17	5.74348e-16	371	371
GPRIN1	0.421156	2.20519e-17	5.81879e-16	371	371
SBK1	0.421109	2.22501e-17	5.86331e-16	371	370
RHOF	0.421012	2.26678e-17	5.9655e-16	371	368
MAST2	0.420971	2.28438e-17	6.00389e-16	371	371
ZNF664	0.420878	2.32523e-17	6.10319e-16	371	371
FANCL	0.420776	2.37129e-17	6.21589e-16	371	371
C17orf80	0.420387	2.55411e-17	6.68633e-16	371	371
POP1	0.420248	2.62272e-17	6.84794e-16	371	371
TCHP	0.420206	2.64363e-17	6.88849e-16	371	371
UNK	0.420203	2.64516e-17	6.88849e-16	371	371
LOC146880	0.420158	2.66808e-17	6.9391e-16	371	371
SMARCC2	0.419836	2.83667e-17	7.36795e-16	371	371
RIT1	0.419569	2.98429e-17	7.74127e-16	371	371
USP33	0.419552	2.99435e-17	7.75728e-16	371	371
EFCAB7	0.419475	3.03826e-17	7.86081e-16	371	371
NFKBID	0.419452	3.05171e-17	7.88537e-16	371	370
SLC1A5	0.419368	3.10057e-17	8.00125e-16	371	371
ANP32E	0.41929	3.14715e-17	8.11092e-16	371	371
NAA25	0.41921	3.19516e-17	8.21341e-16	371	371
FOXK2	0.419101	3.26227e-17	8.36435e-16	371	371
GLIS2	0.418817	3.44274e-17	8.81571e-16	371	371
CUZD1	0.418712	3.51196e-17	8.98143e-16	371	345
PRKDC	0.418488	3.66448e-17	9.35947e-16	371	371
FRMD8	0.418176	3.88723e-17	9.903e-16	371	371
LRRC1	0.418129	3.92269e-17	9.96783e-16	371	371
HNRNPD	0.417917	4.08309e-17	1.0349e-15	371	371
RACGAP1P	0.417906	4.09151e-17	1.03572e-15	371	295
SET	0.417785	4.1862e-17	1.05834e-15	371	371
FBXO41	0.417695	4.2583e-17	1.07521e-15	371	370
CSPG5	0.417591	4.34244e-17	1.09506e-15	371	367
DDX20	0.417582	4.34953e-17	1.09547e-15	371	371
DTYMK	0.417484	4.43111e-17	1.1146e-15	371	371
PRRT2	0.417068	4.79278e-17	1.20406e-15	371	368
RTN3	0.416739	5.09953e-17	1.27951e-15	371	371
AACS	0.41672	5.11794e-17	1.28251e-15	371	371
CEP192	0.416465	5.37008e-17	1.34232e-15	371	371
HDAC2	0.416304	5.53461e-17	1.38171e-15	371	371
PDGFRL	0.415976	5.88776e-17	1.46804e-15	371	371
PDK3	0.415916	5.95414e-17	1.48273e-15	371	371
TMEM107	0.41563	6.28286e-17	1.56069e-15	371	371
CHST11	0.41558	6.34148e-17	1.57133e-15	371	371
CNIH2	0.415527	6.4056e-17	1.58525e-15	371	367
CCNI2	0.415459	6.48804e-17	1.60366e-15	371	333
ZNF620	0.415344	6.6288e-17	1.63642e-15	371	371
DCK	0.415306	6.67575e-17	1.64597e-15	371	371
POLE3	0.415274	6.71596e-17	1.65384e-15	371	371
NUP37	0.415128	6.90259e-17	1.6956e-15	371	371
ITPR3	0.41499	7.08344e-17	1.73789e-15	371	371
C13orf37	0.414971	7.10837e-17	1.74186e-15	371	371
SRGAP2	0.414528	7.72344e-17	1.88562e-15	371	371
CELF4	0.414507	7.75387e-17	1.89073e-15	371	334
SMPD4	0.41439	7.92543e-17	1.9302e-15	371	371
IER5	0.413926	8.64347e-17	2.10251e-15	371	371
ZNF486	0.413824	8.81006e-17	2.13867e-15	371	330
PTPRO	0.413821	8.81362e-17	2.13867e-15	371	369
CMTM1	0.413561	9.25161e-17	2.23703e-15	371	371
DLEU2	0.413537	9.29436e-17	2.24439e-15	371	371
CROCCL2	0.413373	9.58163e-17	2.30602e-15	371	371
RBM12	0.413372	9.58432e-17	2.30602e-15	371	371
PSPH	0.413353	9.61816e-17	2.31138e-15	371	371
RAB23	0.413266	9.77535e-17	2.34632e-15	371	371
NR2C1	0.413255	9.79533e-17	2.34829e-15	371	371
RAVER1	0.413238	9.82579e-17	2.35276e-15	371	371
PIGS	0.413207	9.88376e-17	2.3638e-15	371	371
TPM3	0.412863	1.05366e-16	2.51691e-15	371	371
NPC1	0.412412	1.14581e-16	2.73376e-15	371	371
BFSP1	0.412097	1.21479e-16	2.89248e-15	371	371
PJA1	0.412095	1.21524e-16	2.89248e-15	371	371
NUAK1	0.411326	1.40142e-16	3.3237e-15	371	371
SUDS3	0.411231	1.42616e-16	3.37433e-15	371	371
FCHO1	0.410984	1.49274e-16	3.52769e-15	371	371
GPC2	0.410843	1.53215e-16	3.61653e-15	371	355
NFE2L3	0.410794	1.54619e-16	3.64534e-15	371	371
ANKLE1	0.410651	1.5875e-16	3.73831e-15	371	365
RBBP4	0.410544	1.61919e-16	3.80845e-15	371	371
CTSL2	0.410516	1.62754e-16	3.82356e-15	371	355
ZNF267	0.410464	1.64323e-16	3.85588e-15	371	371
FOXD2	0.410404	1.66156e-16	3.8943e-15	371	371
LSM12	0.41033	1.68432e-16	3.94301e-15	371	371
OGFRL1	0.409791	1.86027e-16	4.34469e-15	371	371
TRIM31	0.409673	1.90101e-16	4.43465e-15	371	364
FUBP1	0.409511	1.95853e-16	4.5635e-15	371	371
R3HDM1	0.40941	1.99549e-16	4.63952e-15	371	371
LRRC8B	0.409405	1.99736e-16	4.63952e-15	371	371
LOC349114	0.409402	1.99815e-16	4.63952e-15	371	371
LRRCC1	0.409377	2.00755e-16	4.65347e-15	371	371
EGLN3	0.409373	2.00883e-16	4.65347e-15	371	371
PPM1D	0.40932	2.02859e-16	4.6938e-15	371	371
UBE2N	0.409276	2.04525e-16	4.72686e-15	371	371
DRAM1	0.409241	2.05841e-16	4.75175e-15	371	371
BAI2	0.409183	2.08037e-16	4.79689e-15	371	346
C12orf65	0.409099	2.11259e-16	4.86555e-15	371	371
KCTD17	0.409	2.15136e-16	4.94913e-15	371	371
FANCA	0.408712	2.26816e-16	5.19981e-15	371	371
PLCE1	0.40834	2.42832e-16	5.55419e-15	371	371
SKP2	0.408236	2.47499e-16	5.65428e-15	371	371
HACE1	0.40823	2.47776e-16	5.65428e-15	371	370
RAP2A	0.408188	2.49672e-16	5.69103e-15	371	371
CEP97	0.408154	2.51266e-16	5.72082e-15	371	371
BCAT1	0.407908	2.62839e-16	5.97314e-15	371	371
CD109	0.407905	2.62948e-16	5.97314e-15	371	371
XPO1	0.407855	2.65373e-16	6.01451e-15	371	371
LOC441666	0.407573	2.79399e-16	6.31803e-15	371	344
CDKN2D	0.407489	2.83714e-16	6.40833e-15	371	371
VHL	0.407462	2.85121e-16	6.43283e-15	371	371
OBFC2B	0.407319	2.92678e-16	6.59586e-15	371	371
TCTN2	0.407287	2.94394e-16	6.62704e-15	371	371
POGK	0.407162	3.01167e-16	6.77183e-15	371	371
PTTG2	0.407084	3.05505e-16	6.86163e-15	371	220
MMP12	0.40707	3.06274e-16	6.87116e-15	371	304
PAPSS1	0.407051	3.07335e-16	6.8872e-15	371	371
TOE1	0.406758	3.2424e-16	7.2254e-15	371	371
LRP8	0.406733	3.25691e-16	7.24962e-15	371	369
C5orf30	0.406695	3.27956e-16	7.29189e-15	371	371
SNHG1	0.406673	3.29265e-16	7.31283e-15	371	371
RFC2	0.406401	3.46031e-16	7.65958e-15	371	371
PIAS3	0.406371	3.47911e-16	7.69266e-15	371	371
LOC646851	0.406167	3.6107e-16	7.97476e-15	371	344
NCBP2	0.406088	3.66259e-16	8.08042e-15	371	371
PTPDC1	0.406048	3.68924e-16	8.1302e-15	371	371
NEB	0.405769	3.88105e-16	8.53404e-15	371	371
PMS1	0.405616	3.99065e-16	8.76534e-15	371	371
IPO9	0.40525	4.26454e-16	9.35441e-15	371	371
LY6G5B	0.40524	4.27218e-16	9.35441e-15	371	370
ZNF605	0.405215	4.2922e-16	9.3863e-15	371	371
C19orf47	0.405156	4.33819e-16	9.47646e-15	371	371
RIMBP3	0.405008	4.45576e-16	9.70139e-15	371	370
C13orf23	0.404978	4.48007e-16	9.74365e-15	371	371
ZNF792	0.404907	4.53831e-16	9.85957e-15	371	371
MAPRE1	0.404811	4.61734e-16	1.00203e-14	371	371
MCF2L2	0.404788	4.63742e-16	1.0053e-14	371	337
DHDH	0.40473	4.68562e-16	1.01464e-14	371	337
WSB1	0.404629	4.77261e-16	1.03236e-14	371	371
HAUS2	0.404496	4.88866e-16	1.05631e-14	371	371
UBTD2	0.404148	5.20596e-16	1.12122e-14	371	371
SLFN13	0.403607	5.74e-16	1.23224e-14	371	371
LRRC37B	0.403522	5.82878e-16	1.24996e-14	371	371
CHD4	0.403458	5.89629e-16	1.26307e-14	371	371
HP1BP3	0.402908	6.50939e-16	1.39142e-14	371	371
EHBP1L1	0.402847	6.58227e-16	1.40549e-14	371	371
REEP4	0.402215	7.37259e-16	1.57087e-14	371	371
C12orf4	0.402153	7.45584e-16	1.58691e-14	371	371
C6orf192	0.402141	7.47226e-16	1.58871e-14	371	371
TUBA1C	0.402045	7.60207e-16	1.61459e-14	371	371
PHEX	0.401545	8.31374e-16	1.76123e-14	371	232
PPFIA4	0.401536	8.32792e-16	1.76124e-14	371	339
THOC4	0.40149	8.39676e-16	1.77392e-14	371	371
TMEM165	0.401471	8.42539e-16	1.77808e-14	371	371
LYPD6	0.401168	8.89486e-16	1.87517e-14	371	322
SUPT7L	0.401158	8.91065e-16	1.87651e-14	371	371
RBMX	0.40084	9.4315e-16	1.9841e-14	371	371
DAND5	0.400783	9.52829e-16	2.00235e-14	371	304
CCDC76	0.400689	9.68857e-16	2.03388e-14	371	371
MARCKS	0.400597	9.84997e-16	2.06342e-14	371	371
FUS	0.400526	9.97581e-16	2.08759e-14	371	371
RNASE2	0.40034	1.03128e-15	2.15584e-14	371	332
ADAMTS6	0.400262	1.04566e-15	2.1836e-14	371	363
ZNF169	0.400232	1.0513e-15	2.19308e-14	371	371
SGK494	0.400186	1.05982e-15	2.20854e-14	371	371
SALL4	0.400089	1.07842e-15	2.24095e-14	371	329
ZNF8	0.400087	1.07874e-15	2.24095e-14	371	371
SMARCC1	0.399993	1.09701e-15	2.27416e-14	371	371
SLC36A4	0.399872	1.12091e-15	2.31887e-14	371	371
C3orf21	0.399797	1.13598e-15	2.34762e-14	371	371
DLG3	0.399447	1.20889e-15	2.49313e-14	371	371
LRRC37B2	0.399362	1.22739e-15	2.52343e-14	371	371
C9orf110	0.399256	1.25061e-15	2.56852e-14	371	350
STX6	0.39899	1.31119e-15	2.69016e-14	371	371
LASS5	0.398687	1.38363e-15	2.83587e-14	371	371
SLCO4C1	0.398633	1.39702e-15	2.86038e-14	371	341
SYT1	0.398561	1.41476e-15	2.89371e-14	371	359
SLC4A7	0.398546	1.41866e-15	2.89574e-14	371	371
KDELC1	0.398372	1.46308e-15	2.98336e-14	371	371
MLLT11	0.39826	1.49235e-15	3.03993e-14	371	371
NCRNA00173	0.398177	1.51452e-15	3.08194e-14	371	288
UBR7	0.397846	1.6057e-15	3.26083e-14	371	371
NT5DC2	0.397814	1.61495e-15	3.27628e-14	371	371
HLTF	0.397665	1.65798e-15	3.35673e-14	371	371
HMGN1	0.397503	1.70603e-15	3.447e-14	371	371
SPHK1	0.397475	1.71468e-15	3.46097e-14	371	371
CASC5	0.397417	1.73238e-15	3.49132e-14	371	371
ZBTB34	0.397414	1.73322e-15	3.49132e-14	371	371
CANT1	0.39737	1.74669e-15	3.51491e-14	371	371
ZNF431	0.397151	1.81549e-15	3.64966e-14	371	371
TDP1	0.397073	1.84071e-15	3.69663e-14	371	371
IMPDH1	0.396959	1.87803e-15	3.764e-14	371	371
LOC647121	0.396884	1.90312e-15	3.81045e-14	371	371
ZNF492	0.396791	1.93448e-15	3.86936e-14	371	264
TBP	0.396777	1.93936e-15	3.87521e-14	371	371
MRE11A	0.39671	1.96217e-15	3.91688e-14	371	371
GDAP1	0.396622	1.99293e-15	3.9743e-14	371	370
RHBDL2	0.396554	2.01698e-15	4.01822e-14	371	364
CAND1	0.396484	2.04213e-15	4.06022e-14	371	371
SKA2	0.396453	2.05308e-15	4.07792e-14	371	371
EFHC1	0.396289	2.11343e-15	4.1936e-14	371	371
DMXL2	0.396273	2.11924e-15	4.20094e-14	371	371
GGA3	0.396181	2.15365e-15	4.26069e-14	371	371
LRDD	0.39615	2.16552e-15	4.27992e-14	371	371
PRDM4	0.395865	2.27696e-15	4.4957e-14	371	371
FIGN	0.395785	2.30893e-15	4.5543e-14	371	367
IL4I1	0.395679	2.35261e-15	4.63587e-14	371	371
KIAA0406	0.395588	2.3903e-15	4.70085e-14	371	371
BAK1	0.395543	2.4093e-15	4.73353e-14	371	371
RNASEN	0.395483	2.43492e-15	4.77915e-14	371	371
RAD18	0.395309	2.51037e-15	4.9224e-14	371	371
ENO2	0.395281	2.5224e-15	4.94112e-14	371	371
USP37	0.395172	2.57127e-15	5.02697e-14	371	371
C3orf52	0.395164	2.57461e-15	5.02857e-14	371	330
WTAP	0.394963	2.66694e-15	5.19871e-14	371	371
PRMT3	0.39491	2.69195e-15	5.24233e-14	371	371
SNRPD1	0.394696	2.7948e-15	5.4373e-14	371	371
GNPDA1	0.394489	2.89781e-15	5.63221e-14	371	371
FAM161A	0.394366	2.9609e-15	5.74922e-14	371	370
ICMT	0.394103	3.09995e-15	6.01335e-14	371	371
ZNF883	0.393996	3.15814e-15	6.12028e-14	371	357
UBE2Z	0.393948	3.18475e-15	6.16585e-14	371	371
HNRNPU	0.393936	3.19166e-15	6.17066e-14	371	371
CCDC66	0.393933	3.19343e-15	6.17066e-14	371	371
MAMSTR	0.393694	3.32918e-15	6.42674e-14	371	370
FOXJ3	0.393646	3.35754e-15	6.47522e-14	371	371
BUB3	0.39363	3.36659e-15	6.48639e-14	371	371
RPL13P5	0.393405	3.50104e-15	6.73891e-14	371	367
VEGFB	0.393363	3.52671e-15	6.78176e-14	371	371
CA9	0.393147	3.66191e-15	7.02818e-14	371	305
SETD5	0.393128	3.67423e-15	7.04504e-14	371	371
ARMC9	0.39312	3.67947e-15	7.0483e-14	371	371
CD3EAP	0.393003	3.75526e-15	7.17968e-14	371	371
ZNF384	0.392829	3.87013e-15	7.37806e-14	371	371
CCDC21	0.392823	3.87451e-15	7.37935e-14	371	371
ANKRD13D	0.392758	3.91856e-15	7.45611e-14	371	371
C7orf60	0.392751	3.92306e-15	7.45755e-14	371	371
ADAM17	0.392587	4.03647e-15	7.66583e-14	371	371
PHF21A	0.392217	4.30461e-15	8.16728e-14	371	371
ZNF714	0.39204	4.43892e-15	8.40611e-14	371	371
RQCD1	0.39191	4.53977e-15	8.5839e-14	371	369
PHIP	0.391908	4.54143e-15	8.5839e-14	371	371
C5orf54	0.391761	4.65887e-15	8.7892e-14	371	371
MAPKAPK5	0.391549	4.8329e-15	9.0917e-14	371	371
OTX1	0.39133	5.01987e-15	9.43451e-14	371	327
DOT1L	0.391283	5.06014e-15	9.49624e-14	371	371
SLC22A15	0.391281	5.06224e-15	9.49624e-14	371	364
TRPC1	0.390868	5.43639e-15	1.01503e-13	371	370
CALCR	0.390854	5.44957e-15	1.01654e-13	371	245
TP73	0.390577	5.71707e-15	1.06544e-13	371	369
FZD1	0.390271	6.02669e-15	1.12104e-13	371	371
DRP2	0.390107	6.19908e-15	1.15096e-13	371	257
PAFAH1B3	0.390013	6.30089e-15	1.16769e-13	371	371
C14orf145	0.389939	6.38139e-15	1.18041e-13	371	370
MMP1	0.389912	6.41168e-15	1.18491e-13	371	345
ST6GALNAC5	0.389892	6.43295e-15	1.18679e-13	371	269
CAD	0.389892	6.43374e-15	1.18679e-13	371	371
LOC283267	0.389803	6.53219e-15	1.20222e-13	371	371
TEX10	0.389799	6.5373e-15	1.20222e-13	371	371
KIN	0.389795	6.54154e-15	1.20222e-13	371	371
GNPDA2	0.389609	6.75396e-15	1.24011e-13	371	371
LUC7L3	0.389578	6.79046e-15	1.24567e-13	371	371
LARP4B	0.38943	6.96556e-15	1.27661e-13	371	371
RAVER2	0.389407	6.99235e-15	1.28035e-13	371	371
ZRANB2	0.389114	7.35397e-15	1.34532e-13	371	371
AMIGO2	0.389053	7.43108e-15	1.35818e-13	371	371
PCYOX1L	0.388922	7.59966e-15	1.38645e-13	371	371
VRK2	0.388885	7.64807e-15	1.39401e-13	371	371
HAT1	0.388859	7.68254e-15	1.39901e-13	371	371
ZNF785	0.38858	8.05966e-15	1.46634e-13	371	371
TBC1D10B	0.388525	8.13533e-15	1.47741e-13	371	371
NAALAD2	0.388439	8.25617e-15	1.49799e-13	371	368
KCTD7	0.388354	8.37673e-15	1.51848e-13	371	371
CCR8	0.388287	8.47378e-15	1.53329e-13	371	256
FBXL19	0.388245	8.53569e-15	1.54169e-13	371	371
LOC642846	0.388225	8.56421e-15	1.54544e-13	371	371
KLHDC5	0.388013	8.88112e-15	1.60117e-13	371	371
SEMA4D	0.387886	9.07594e-15	1.63452e-13	371	371
VPS37C	0.387882	9.08249e-15	1.63452e-13	371	371
NCEH1	0.387859	9.11789e-15	1.63941e-13	371	371
ITGA5	0.387688	9.3889e-15	1.68662e-13	371	371
INTS8	0.387682	9.39816e-15	1.68676e-13	371	371
FLJ40330	0.387454	9.77108e-15	1.75053e-13	371	312
MUM1L1	0.387332	9.9764e-15	1.78411e-13	371	290
UTP6	0.386798	1.09271e-14	1.94888e-13	371	371
FAM122B	0.386782	1.09583e-14	1.95269e-13	371	371
DENND4B	0.386578	1.13445e-14	2.0161e-13	371	371
GNAZ	0.386444	1.16059e-14	2.06073e-13	371	371
TMEM65	0.386373	1.17475e-14	2.08401e-13	371	371
NEURL3	0.38621	1.20784e-14	2.1389e-13	371	369
ZNF708	0.386031	1.24506e-14	2.19894e-13	371	371
ZNF532	0.386001	1.25133e-14	2.20806e-13	371	371
MYLK2	0.385724	1.31162e-14	2.31239e-13	371	320
NFATC2IP	0.385565	1.34762e-14	2.37377e-13	371	371
ACOT11	0.385289	1.4122e-14	2.48314e-13	371	363
CTRL	0.385121	1.4529e-14	2.55243e-13	371	366
KREMEN2	0.384917	1.5039e-14	2.63507e-13	371	306
ZNF346	0.38486	1.51859e-14	2.65848e-13	371	371
PIGA	0.38481	1.53146e-14	2.67864e-13	371	371
HMGN2	0.384739	1.55003e-14	2.70874e-13	371	371
PRPF3	0.384601	1.58652e-14	2.76766e-13	371	371
TULP3	0.38457	1.59493e-14	2.77989e-13	371	371
PHF12	0.384527	1.60657e-14	2.79773e-13	371	371
FABP5	0.384459	1.62514e-14	2.82514e-13	371	371
LLGL1	0.384412	1.63812e-14	2.84521e-13	371	371
BRI3BP	0.384142	1.7145e-14	2.97011e-13	371	371
LOC339535	0.384021	1.74976e-14	3.02592e-13	371	206
PTP4A2	0.383655	1.86107e-14	3.21562e-13	371	371
ZNF101	0.383635	1.86737e-14	3.22372e-13	371	371
ZNF718	0.383508	1.90771e-14	3.28767e-13	371	370
LRRC59	0.383458	1.92403e-14	3.31292e-13	371	371
LOC144486	0.383439	1.93026e-14	3.32078e-13	371	365
PLCXD2	0.383431	1.93288e-14	3.32241e-13	371	371
SMAP1	0.383278	1.98329e-14	3.4032e-13	371	371
GTPBP2	0.383174	2.01811e-14	3.45996e-13	371	371
ANO9	0.382938	2.10009e-14	3.59433e-13	371	366
GMEB1	0.382921	2.10609e-14	3.60151e-13	371	371
RASGEF1A	0.382746	2.16892e-14	3.70259e-13	371	348
STIP1	0.382708	2.18279e-14	3.72307e-13	371	371
DEGS1	0.382694	2.18769e-14	3.72825e-13	371	371
INPP5J	0.382446	2.2808e-14	3.87476e-13	371	366
UBE2I	0.382444	2.28144e-14	3.87476e-13	371	371
LHFPL2	0.38227	2.34922e-14	3.98647e-13	371	371
MICAL1	0.382149	2.39735e-14	4.06468e-13	371	371
KPNA5	0.382117	2.41019e-14	4.08297e-13	371	368
GCN1L1	0.382102	2.41635e-14	4.08994e-13	371	371
HNRNPUL1	0.382005	2.45583e-14	4.15223e-13	371	371
KATNA1	0.381996	2.45941e-14	4.15223e-13	371	371
C19orf55	0.381929	2.48732e-14	4.19336e-13	371	371
FGD6	0.381928	2.48798e-14	4.19336e-13	371	371
LOC642852	0.381776	2.55206e-14	4.29774e-13	371	371
CREB1	0.381618	2.62029e-14	4.4089e-13	371	371
PRPF39	0.381549	2.6508e-14	4.45271e-13	371	371
BICD1	0.381281	2.77247e-14	4.65318e-13	371	367
RAI14	0.381246	2.7886e-14	4.6763e-13	371	371
LOC127841	0.381185	2.81721e-14	4.72031e-13	371	318
SFRS3	0.380827	2.99046e-14	5.00218e-13	371	371
CLGN	0.380729	3.04015e-14	5.08103e-13	371	363
METTL9	0.380135	3.35607e-14	5.60433e-13	371	371
DHFR	0.380084	3.38506e-14	5.648e-13	371	371
TFAP2E	0.380048	3.40527e-14	5.67697e-13	371	359
HSPA13	0.379883	3.49997e-14	5.82023e-13	371	371
MBOAT1	0.379851	3.51874e-14	5.84289e-13	371	371
RAB35	0.379849	3.52015e-14	5.84289e-13	371	371
RFX5	0.379845	3.52239e-14	5.84289e-13	371	371
CCDC74B	0.379814	3.54029e-14	5.86769e-13	371	315
METTL6	0.379798	3.55018e-14	5.8792e-13	371	371
ATP6V0A2	0.379701	3.60738e-14	5.96895e-13	371	371
2022-03-03	0.379655	3.63524e-14	6.01007e-13	371	370
CCDC41	0.379637	3.64604e-14	6.02291e-13	371	371
ELMO2	0.379621	3.656e-14	6.03436e-13	371	371
RCOR2	0.379259	3.88273e-14	6.39271e-13	371	334
NCKAP5L	0.379232	3.90029e-14	6.41632e-13	371	371
UTP18	0.379176	3.93661e-14	6.46678e-13	371	371
LRP12	0.379136	3.96241e-14	6.50241e-13	371	371
C9orf30	0.379119	3.97407e-14	6.51617e-13	371	371
BFSP2	0.378652	4.29355e-14	7.02844e-13	371	274
PARP2	0.378619	4.31714e-14	7.06125e-13	371	371
RPIA	0.378473	4.42323e-14	7.22884e-13	371	371
CA5BP	0.378389	4.48476e-14	7.3234e-13	371	371
PIP4K2A	0.37834	4.52169e-14	7.37162e-13	371	371
SLC37A3	0.378252	4.58782e-14	7.47331e-13	371	371
C1orf88	0.378228	4.606e-14	7.4968e-13	371	306
PTBP1	0.378205	4.62317e-14	7.5186e-13	371	371
ARSJ	0.378108	4.69817e-14	7.63433e-13	371	369
AKAP5	0.378012	4.77355e-14	7.75051e-13	371	371
RMI1	0.378	4.78299e-14	7.7595e-13	371	371
EPHX4	0.377786	4.95487e-14	8.0318e-13	371	343
SFRS9	0.377655	5.06376e-14	8.19499e-13	371	371
SF3A3	0.377583	5.1238e-14	8.28543e-13	371	371
PAK6	0.377311	5.35935e-14	8.65929e-13	371	352
ZNF296	0.377276	5.3899e-14	8.70159e-13	371	371
FAM24B	0.377238	5.42411e-14	8.74973e-13	371	356
C10orf18	0.377091	5.55721e-14	8.94993e-13	371	371
CALU	0.376974	5.66535e-14	9.11674e-13	371	371
SLC35E4	0.376835	5.79588e-14	9.31926e-13	371	371
SFRS18	0.37666	5.96598e-14	9.58503e-13	371	371
POLE	0.376607	6.01779e-14	9.6527e-13	371	371
AMD1	0.376574	6.05074e-14	9.69774e-13	371	371
ZNF286A	0.376429	6.19683e-14	9.91592e-13	371	371
ZCCHC11	0.376368	6.25886e-14	1.00071e-12	371	371
RFXAP	0.376098	6.54344e-14	1.04538e-12	371	371
RGS19	0.376084	6.55848e-14	1.04694e-12	371	371
CLDN18	0.376077	6.56535e-14	1.0472e-12	371	244
EWSR1	0.376	6.64939e-14	1.05975e-12	371	371
HSF2BP	0.375651	7.04048e-14	1.11851e-12	371	368
LOC100286793	0.375278	7.48442e-14	1.18714e-12	371	371
NAP1L1	0.375173	7.61466e-14	1.20396e-12	371	371
DLL3	0.375137	7.65957e-14	1.2101e-12	371	139
GPD1L	0.374988	7.84866e-14	1.23899e-12	371	371
PHF6	0.374948	7.89952e-14	1.24604e-12	371	371
TBC1D1	0.374805	8.08629e-14	1.27449e-12	371	371
RALGAPB	0.374797	8.09704e-14	1.27517e-12	371	371
SF3B4	0.37479	8.10647e-14	1.27532e-12	371	371
UBE2E1	0.374787	8.11079e-14	1.27532e-12	371	371
CDC42SE1	0.374654	8.28913e-14	1.30131e-12	371	371
SMC1A	0.374627	8.32606e-14	1.30608e-12	371	371
UNG	0.374566	8.40873e-14	1.31697e-12	371	371
CNOT10	0.374329	8.74057e-14	1.3668e-12	371	371
PTGFR	0.374258	8.84288e-14	1.38171e-12	371	353
CCDC34	0.37424	8.86863e-14	1.38465e-12	371	371
CCDC64	0.374175	8.96355e-14	1.39837e-12	371	371
BCL9	0.374097	9.07723e-14	1.415e-12	371	371
DDN	0.374005	9.21582e-14	1.43494e-12	371	288
CTDSPL2	0.374002	9.21958e-14	1.43494e-12	371	371
DOCK10	0.37385	9.45082e-14	1.46978e-12	371	371
UGT8	0.373772	9.57188e-14	1.48745e-12	371	222
TNFRSF13C	0.37367	9.732e-14	1.50998e-12	371	275
FAM159A	0.373659	9.75031e-14	1.51164e-12	371	334
TMX3	0.373466	1.00611e-13	1.5574e-12	371	371
CIB2	0.37325	1.04203e-13	1.61174e-12	371	370
PRKD3	0.373202	1.05025e-13	1.6232e-12	371	371
EVC2	0.37309	1.06956e-13	1.65049e-12	371	362
C10orf137	0.373027	1.08044e-13	1.66598e-12	371	371
PDCL	0.372837	1.11439e-13	1.71701e-12	371	371
COIL	0.37269	1.14137e-13	1.75722e-12	371	371
ADAT2	0.372618	1.15468e-13	1.77634e-12	371	371
TCL6	0.372597	1.15859e-13	1.78098e-12	371	233
VNN2	0.372342	1.20758e-13	1.85342e-12	371	371
ESCO1	0.372295	1.21681e-13	1.86615e-12	371	371
L3MBTL	0.371954	1.28596e-13	1.96765e-12	371	371
HPSE	0.371947	1.28737e-13	1.96831e-12	371	367
TAF6	0.371935	1.2899e-13	1.97065e-12	371	371
HECTD2	0.371842	1.30949e-13	1.99905e-12	371	371
RAB39	0.371804	1.31757e-13	2.00984e-12	371	301
RBMXL1	0.37153	1.37724e-13	2.09766e-12	371	371
FER1L4	0.371519	1.37954e-13	2.09956e-12	371	359
HN1	0.371473	1.38989e-13	2.11369e-12	371	371
MSH5	0.371458	1.39329e-13	2.11724e-12	371	371
SUV420H2	0.371429	1.39978e-13	2.12387e-12	371	371
AMIGO3	0.371411	1.40389e-13	2.12849e-12	371	371
ODF2L	0.371403	1.4058e-13	2.12976e-12	371	371
RAD9A	0.371364	1.41463e-13	2.14151e-12	371	371
C13orf18	0.371351	1.41771e-13	2.14454e-12	371	371
KHSRP	0.371032	1.49262e-13	2.25443e-12	371	371
SERPINH1	0.371002	1.4998e-13	2.26356e-12	371	371
BRSK1	0.37098	1.50519e-13	2.26998e-12	371	371
CD101	0.370857	1.53535e-13	2.31197e-12	371	370
PLEKHH2	0.37079	1.55198e-13	2.33347e-12	371	367
ZNF639	0.370761	1.55922e-13	2.34259e-12	371	371
SFRS7	0.370704	1.57364e-13	2.3607e-12	371	371
PRR19	0.370686	1.57806e-13	2.36555e-12	371	370
CASP7	0.370515	1.62222e-13	2.42991e-12	371	371
DHX9	0.370394	1.6542e-13	2.47596e-12	371	371
WDR34	0.370351	1.66579e-13	2.49143e-12	371	371
LIMK1	0.370284	1.68381e-13	2.51649e-12	371	371
HMGXB4	0.370221	1.70085e-13	2.54006e-12	371	371
BCORL1	0.37007	1.74267e-13	2.59862e-12	371	371
MST4	0.370049	1.74848e-13	2.60338e-12	371	371
SHOX2	0.37002	1.75685e-13	2.61389e-12	371	321
TRIM46	0.370009	1.75991e-13	2.61649e-12	371	368
RNF219	0.369855	1.80399e-13	2.67803e-12	371	371
ATXN7L3	0.369757	1.83276e-13	2.71751e-12	371	371
LSG1	0.369755	1.83332e-13	2.71751e-12	371	371
CLEC5A	0.369712	1.84604e-13	2.73434e-12	371	332
GLT25D1	0.369706	1.84773e-13	2.73481e-12	371	371
C9orf53	0.369587	1.8834e-13	2.78347e-12	371	211
C12orf41	0.369529	1.90094e-13	2.8073e-12	371	371
NUDT1	0.369491	1.9125e-13	2.82228e-12	371	371
IQCD	0.369465	1.92065e-13	2.83221e-12	371	369
ZNF239	0.369404	1.93949e-13	2.85465e-12	371	363
C19orf57	0.369402	1.94017e-13	2.85465e-12	371	371
PPP1R12A	0.369381	1.94673e-13	2.8622e-12	371	371
SP140	0.369363	1.95245e-13	2.86849e-12	371	371
ZNF826	0.369358	1.95393e-13	2.86854e-12	371	357
INPP4A	0.369246	1.98925e-13	2.91825e-12	371	371
C3orf39	0.369175	2.0122e-13	2.94974e-12	371	371
C12orf70	0.368946	2.08732e-13	3.05537e-12	371	261
ZNF711	0.368914	2.09802e-13	3.06878e-12	371	364
C1orf183	0.368675	2.18003e-13	3.18405e-12	371	371
IFT172	0.368535	2.22914e-13	3.25205e-12	371	371
PLAUR	0.368533	2.22984e-13	3.25205e-12	371	371
FOXN4	0.368508	2.23901e-13	3.26302e-12	371	334
HSPB11	0.368288	2.31918e-13	3.37493e-12	371	371
RAD21	0.36827	2.32571e-13	3.38195e-12	371	371
UTRN	0.367994	2.43059e-13	3.53189e-12	371	371
CBX2	0.367947	2.44879e-13	3.55373e-12	371	371
C2orf44	0.367913	2.46205e-13	3.56719e-12	371	371
AKNA	0.367876	2.47663e-13	3.58571e-12	371	371
TUBB	0.367696	2.54897e-13	3.68393e-12	371	371
MEX3A	0.367693	2.55001e-13	3.68393e-12	371	371
TBX19	0.367676	2.55696e-13	3.69129e-12	371	371
NPIP	0.367457	2.64794e-13	3.8171e-12	371	371
PRELID2	0.36744	2.65528e-13	3.82491e-12	371	371
SV2A	0.36735	2.69353e-13	3.8772e-12	371	371
OSBPL3	0.367281	2.72335e-13	3.9173e-12	371	371
MCOLN2	0.367242	2.74039e-13	3.93328e-12	371	362
VEZT	0.367173	2.77073e-13	3.97397e-12	371	371
ZNF496	0.367142	2.78422e-13	3.99045e-12	371	371
NXPH2	0.367122	2.79297e-13	4.00012e-12	371	102
ANKRD36	0.367103	2.80143e-13	4.00935e-12	371	371
LOC149837	0.366655	3.00854e-13	4.29957e-12	371	364
STK17B	0.366515	3.07617e-13	4.38993e-12	371	371
TREM2	0.366418	3.12375e-13	4.45464e-12	371	370
PLSCR1	0.366342	3.16209e-13	4.5061e-12	371	371
HNRNPM	0.366311	3.17736e-13	4.52461e-12	371	371
CACNA1D	0.366305	3.18068e-13	4.5261e-12	371	368
CCDC137	0.366211	3.22848e-13	4.58529e-12	371	371
CCDC74A	0.366209	3.22918e-13	4.58529e-12	371	363
USP13	0.3662	3.23383e-13	4.58863e-12	371	371
FAM49A	0.366134	3.26809e-13	4.63394e-12	371	371
ZNF195	0.36612	3.27525e-13	4.64079e-12	371	371
PLP2	0.366086	3.29304e-13	4.66269e-12	371	371
HAUS8	0.366065	3.304e-13	4.67211e-12	371	371
UHRF1BP1	0.366064	3.30439e-13	4.67211e-12	371	371
ZNF84	0.36593	3.37564e-13	4.76947e-12	371	371
ASPHD2	0.365899	3.39191e-13	4.78907e-12	371	370
MEP1A	0.365667	3.51934e-13	4.96545e-12	371	314
FAM105A	0.365582	3.56676e-13	5.0288e-12	371	371
TCP10L2	0.365448	3.64329e-13	5.12814e-12	371	185
ZNF326	0.36538	3.68246e-13	5.17727e-12	371	371
ZBTB24	0.365352	3.69922e-13	5.19716e-12	371	371
DENND5A	0.365342	3.70509e-13	5.20174e-12	371	371
TBC1D22B	0.365101	3.84904e-13	5.39624e-12	371	371
ZNF100	0.364933	3.9523e-13	5.53323e-12	371	371
LOC387646	0.364833	4.0151e-13	5.61719e-12	371	366
DPF1	0.364817	4.02512e-13	5.62726e-12	371	218
KCNG3	0.364701	4.10005e-13	5.71997e-12	371	119
PLEKHA9	0.364669	4.12076e-13	5.74485e-12	371	371
MAP3K7	0.364602	4.16417e-13	5.8013e-12	371	371
SLC16A3	0.364241	4.40825e-13	6.13276e-12	371	371
GCFC1	0.364195	4.44055e-13	6.17339e-12	371	371
GABRA3	0.364033	4.55505e-13	6.32815e-12	371	139
AP1G2	0.363825	4.70708e-13	6.53481e-12	371	371
RUNDC3A	0.363638	4.84751e-13	6.72507e-12	371	340
RBM25	0.36352	4.93804e-13	6.8459e-12	371	371
BEST1	0.363442	4.99924e-13	6.92593e-12	371	370
CCDC45	0.363296	5.1155e-13	7.07309e-12	371	371
GSTCD	0.363295	5.11612e-13	7.07309e-12	371	371
NAALADL1	0.363285	5.12384e-13	7.07886e-12	371	371
TARDBP	0.363263	5.1415e-13	7.09833e-12	371	371
ZIC5	0.363004	5.35536e-13	7.38336e-12	371	307
MESP2	0.36263	5.67844e-13	7.80178e-12	371	367
ZNF695	0.362498	5.79693e-13	7.9591e-12	371	283
MEX3C	0.36248	5.81386e-13	7.97684e-12	371	371
TXLNB	0.362359	5.92486e-13	8.12355e-12	371	366
SPAG17	0.362287	5.99189e-13	8.2098e-12	371	170
ITPRIPL1	0.362261	6.01655e-13	8.23791e-12	371	367
RNF41	0.361969	6.29781e-13	8.61118e-12	371	371
RPAP2	0.361901	6.36525e-13	8.69183e-12	371	371
HMGN4	0.361823	6.44336e-13	8.78608e-12	371	371
MPZL1	0.361722	6.54528e-13	8.91896e-12	371	371
CECR6	0.361712	6.55548e-13	8.92675e-12	371	367
CEP170	0.361675	6.59337e-13	8.9722e-12	371	371
SSX2IP	0.361551	6.7223e-13	9.14141e-12	371	371
AGFG1	0.361425	6.85618e-13	9.31711e-12	371	371
PHTF1	0.361403	6.87949e-13	9.34242e-12	371	371
CASP5	0.361259	7.03655e-13	9.54269e-12	371	239
LAMB1	0.361231	7.06733e-13	9.57791e-12	371	371
B4GALT4	0.361222	7.07701e-13	9.58451e-12	371	371
ARNT2	0.360942	7.39236e-13	1.00048e-11	371	363
STX2	0.36089	7.4521e-13	1.0072e-11	371	371
RIMS3	0.360775	7.58778e-13	1.02484e-11	371	371
LOC344967	0.36071	7.66472e-13	1.03453e-11	371	360
2022-09-08	0.360666	7.71761e-13	1.04096e-11	371	371
SPIN1	0.360652	7.73407e-13	1.04248e-11	371	371
MAP3K4	0.360605	7.79115e-13	1.04946e-11	371	371
TOP2B	0.360576	7.82638e-13	1.05307e-11	371	371
ZMYND10	0.360488	7.93413e-13	1.06656e-11	371	368
LHFPL3	0.359907	8.68326e-13	1.1649e-11	371	154
PTMA	0.359886	8.71148e-13	1.16714e-11	371	371
H2AFV	0.359886	8.71168e-13	1.16714e-11	371	371
TRIM33	0.359726	8.93038e-13	1.19425e-11	371	371
ATP1A1	0.359725	8.93203e-13	1.19425e-11	371	371
C12orf24	0.359653	9.03236e-13	1.20605e-11	371	371
XPR1	0.35962	9.07881e-13	1.21144e-11	371	371
PNP	0.359554	9.17226e-13	1.22227e-11	371	371
SLC35F2	0.359543	9.18867e-13	1.22364e-11	371	370
PYGO2	0.359505	9.24261e-13	1.23e-11	371	371
TUBG2	0.359433	9.34603e-13	1.24293e-11	371	371
GMIP	0.35939	9.40915e-13	1.25001e-11	371	371
MED12	0.359388	9.41175e-13	1.25001e-11	371	371
C19orf26	0.359262	9.59637e-13	1.27283e-11	371	333
MAPK13	0.359189	9.70645e-13	1.28486e-11	371	371
LSM14B	0.359162	9.74745e-13	1.28943e-11	371	371
PBRM1	0.359129	9.79642e-13	1.29419e-11	371	371
NIN	0.35907	9.88652e-13	1.3035e-11	371	371
KIRREL2	0.358899	1.01516e-12	1.33757e-11	371	204
C10orf81	0.3588	1.03086e-12	1.35646e-11	371	289
SLMO2	0.358676	1.05074e-12	1.3808e-11	371	371
SYNJ2	0.358482	1.08271e-12	1.41812e-11	371	371
UBAP2	0.358415	1.09395e-12	1.43146e-11	371	371
CSRNP2	0.358287	1.1159e-12	1.45681e-11	371	371
ZUFSP	0.357959	1.17386e-12	1.53047e-11	371	371
PA2G4P4	0.357859	1.19199e-12	1.55309e-11	371	371
UCK2	0.357774	1.20768e-12	1.5725e-11	371	371
CCDC52	0.357712	1.21925e-12	1.58653e-11	371	371
LOC285548	0.357597	1.24107e-12	1.61282e-11	371	85
KTI12	0.357564	1.24736e-12	1.61994e-11	371	371
ARHGAP17	0.357544	1.25127e-12	1.62396e-11	371	371
GRIA2	0.357466	1.26631e-12	1.64241e-11	371	121
NBPF15	0.357413	1.27673e-12	1.65485e-11	371	371
GPR161	0.357394	1.28048e-12	1.65859e-11	371	371
TRAF2	0.35739	1.28128e-12	1.65859e-11	371	371
PPP4R1	0.357189	1.32146e-12	1.70948e-11	371	371
EFHC2	0.357133	1.33296e-12	1.72325e-11	371	198
CDH18	0.356983	1.36414e-12	1.76128e-11	371	74
DYNC1LI1	0.35695	1.37089e-12	1.76884e-11	371	371
CEP290	0.35692	1.37725e-12	1.77589e-11	371	371
PITX1	0.3569	1.38151e-12	1.78024e-11	371	323
TIA1	0.35671	1.42239e-12	1.83172e-11	371	371
C6orf223	0.356699	1.42493e-12	1.83382e-11	371	311
ARL13B	0.356674	1.43041e-12	1.83968e-11	371	371
RNF144A	0.356628	1.4404e-12	1.85134e-11	371	371
UBE2Q2	0.356617	1.44286e-12	1.8533e-11	371	371
TRAM1L1	0.356559	1.4557e-12	1.86858e-11	371	333
SEMA4A	0.356415	1.48833e-12	1.90801e-11	371	371
MIR155HG	0.35633	1.50796e-12	1.93193e-11	371	367
FCGBP	0.356323	1.50956e-12	1.93274e-11	371	371
RFX3	0.356304	1.51396e-12	1.93589e-11	371	368
DDR1	0.35628	1.51938e-12	1.94157e-11	371	371
C17orf42	0.356224	1.53259e-12	1.9547e-11	371	371
ZNF397OS	0.356201	1.53799e-12	1.95907e-11	371	371
BAT2	0.35616	1.54774e-12	1.97023e-11	371	371
TMEM44	0.356145	1.55111e-12	1.97326e-11	371	371
C1orf93	0.356112	1.55905e-12	1.98209e-11	371	371
TLR9	0.356104	1.56091e-12	1.98319e-11	371	370
MESDC1	0.356064	1.57058e-12	1.99294e-11	371	371
PPAT	0.356056	1.57245e-12	1.99403e-11	371	371
POC1A	0.355992	1.58792e-12	2.01238e-11	371	371
LOC100130557	0.355911	1.60786e-12	2.03506e-11	371	371
DCP2	0.355859	1.62072e-12	2.04873e-11	371	371
SMC5	0.355814	1.63193e-12	2.06159e-11	371	371
AGTPBP1	0.355647	1.67396e-12	2.11335e-11	371	371
NCRNA00095	0.355483	1.71665e-12	2.16587e-11	371	370
C20orf96	0.355462	1.72222e-12	2.17152e-11	371	371
ZNF445	0.355341	1.75417e-12	2.20762e-11	371	371
RNF157	0.355291	1.76774e-12	2.22049e-11	371	371
ZNF789	0.355273	1.77265e-12	2.22526e-11	371	371
UAP1L1	0.35519	1.79515e-12	2.25176e-11	371	371
MCM9	0.355187	1.79603e-12	2.25176e-11	371	371
RNF26	0.355175	1.79933e-12	2.25448e-11	371	371
BTG3	0.355064	1.83016e-12	2.29167e-11	371	371
GEN1	0.354954	1.86108e-12	2.32892e-11	371	371
FAM117B	0.354824	1.89825e-12	2.37245e-11	371	371
PURB	0.35473	1.92573e-12	2.40228e-11	371	371
NKX3-2	0.354689	1.9377e-12	2.4157e-11	371	239
UTP20	0.354449	2.00998e-12	2.49799e-11	371	371
GPR85	0.35439	2.02817e-12	2.51903e-11	371	367
MGC57346	0.354311	2.05258e-12	2.54776e-11	371	371
MAGEA5	0.354209	2.08458e-12	2.58564e-11	371	96
NONO	0.354206	2.08569e-12	2.58564e-11	371	371
SPIB	0.354184	2.09267e-12	2.59267e-11	371	326
LOC727896	0.354096	2.12075e-12	2.62257e-11	371	370
DUSP7	0.353952	2.1677e-12	2.67896e-11	371	371
LOC220729	0.353912	2.18116e-12	2.69059e-11	371	371
CHD8	0.353863	2.19721e-12	2.70871e-11	371	371
VEZF1	0.353855	2.19997e-12	2.71044e-11	371	371
DUSP9	0.353744	2.23756e-12	2.75505e-11	371	368
LPCAT4	0.35369	2.25571e-12	2.77396e-11	371	371
KRBA1	0.353551	2.30394e-12	2.82978e-11	371	370
ZNF530	0.353439	2.34354e-12	2.87665e-11	371	371
DBNDD2	0.353405	2.35544e-12	2.88948e-11	371	371
AP1S3	0.353308	2.39054e-12	2.93073e-11	371	371
LIN28B	0.353292	2.39649e-12	2.93621e-11	371	148
KIAA0802	0.353191	2.43316e-12	2.97932e-11	371	371
ZPLD1	0.353186	2.43535e-12	2.98016e-11	371	222
SCPEP1	0.353155	2.44647e-12	2.98827e-11	371	371
PLEKHH1	0.353139	2.45242e-12	2.99369e-11	371	371
TRIM32	0.35312	2.4596e-12	3.00062e-11	371	371
SLC1A4	0.353007	2.50217e-12	3.05068e-11	371	371
CARD14	0.352882	2.55012e-12	3.10724e-11	371	367
LPCAT1	0.352612	2.65629e-12	3.23068e-11	371	371
PA2G4	0.352368	2.75609e-12	3.35002e-11	371	371
ZMYM3	0.352355	2.76167e-12	3.35476e-11	371	371
DGKZ	0.352297	2.78608e-12	3.38028e-11	371	371
RBM15B	0.352015	2.90735e-12	3.52099e-11	371	371
RLF	0.351988	2.91898e-12	3.53293e-11	371	371
LOC153684	0.351982	2.92185e-12	3.53425e-11	371	369
DUOXA2	0.351969	2.9275e-12	3.53893e-11	371	287
HTR3A	0.351952	2.93504e-12	3.5459e-11	371	204
FGD1	0.351843	2.98352e-12	3.60228e-11	371	371
TEX15	0.351839	2.98553e-12	3.60253e-11	371	142
ARGLU1	0.351773	3.01549e-12	3.63428e-11	371	371
USP39	0.351767	3.01818e-12	3.63532e-11	371	371
WDR54	0.351753	3.02439e-12	3.6406e-11	371	371
FMO1	0.351638	3.07717e-12	3.69472e-11	371	350
OAS3	0.351635	3.07862e-12	3.69472e-11	371	371
FAM49B	0.351626	3.08301e-12	3.69776e-11	371	371
SYNGR3	0.351612	3.0894e-12	3.70319e-11	371	345
TDRD5	0.351444	3.16848e-12	3.79114e-11	371	164
SP4	0.351421	3.17983e-12	3.80244e-11	371	371
IL21R	0.351206	3.28457e-12	3.91593e-11	371	362
SFT2D1	0.351023	3.37631e-12	4.01809e-11	371	371
DPF2	0.350882	3.4487e-12	4.09935e-11	371	371
TMEM164	0.350802	3.49038e-12	4.14394e-11	371	371
APOL4	0.350714	3.53645e-12	4.19364e-11	371	371
SIPA1L3	0.350703	3.54271e-12	4.19856e-11	371	371
SLC5A3	0.350653	3.56926e-12	4.22751e-11	371	371
KIAA0947	0.350648	3.57209e-12	4.22836e-11	371	371
BTBD10	0.350489	3.65809e-12	4.32758e-11	371	371
PMAIP1	0.350299	3.76387e-12	4.4448e-11	371	365
SLC2A13	0.350252	3.7906e-12	4.47107e-11	371	371
GDAP2	0.350233	3.80173e-12	4.48154e-11	371	371
ZBTB26	0.35022	3.80926e-12	4.48776e-11	371	371
ZBED4	0.350028	3.92008e-12	4.61559e-11	371	371
C2CD3	0.350009	3.93132e-12	4.6261e-11	371	371
SEMA3E	0.34992	3.98438e-12	4.68577e-11	371	207
KIAA1324	0.349908	3.99152e-12	4.69138e-11	371	368
PACSIN1	0.349883	4.00628e-12	4.70596e-11	371	364
LHX4	0.349836	4.03467e-12	4.73652e-11	371	338
ZFC3H1	0.349646	4.15122e-12	4.87047e-11	371	371
EMILIN2	0.349518	4.23168e-12	4.96195e-11	371	371
PLEKHB1	0.349475	4.25906e-12	4.99111e-11	371	363
ZDHHC21	0.349333	4.35039e-12	5.09215e-11	371	370
ZNF43	0.349319	4.35957e-12	5.0999e-11	371	371
ZNF292	0.349116	4.49377e-12	5.25381e-11	371	371
RIMBP3C	0.349045	4.54181e-12	5.30686e-11	371	304
GPX7	0.349039	4.54606e-12	5.30871e-11	371	371
HAVCR1	0.348829	4.69038e-12	5.46443e-11	371	246
NUP160	0.348802	4.70942e-12	5.4834e-11	371	371
HSPA2	0.348728	4.76162e-12	5.53508e-11	371	371
RPA1	0.348728	4.76214e-12	5.53508e-11	371	371
ADAM23	0.348577	4.87053e-12	5.65117e-11	371	317
C5orf13	0.348571	4.87452e-12	5.65252e-11	371	371
LRRC16A	0.348525	4.9082e-12	5.68826e-11	371	370
TCF7L1	0.348467	4.95063e-12	5.7341e-11	371	371
SLAMF8	0.348446	4.96622e-12	5.74881e-11	371	371
TCF3	0.348402	4.99889e-12	5.78326e-11	371	371
NKTR	0.348268	5.09979e-12	5.89658e-11	371	371
MGAT4A	0.348253	5.11128e-12	5.90643e-11	371	371
SNRPA1	0.348079	5.24536e-12	6.04734e-11	371	371
CC2D1B	0.348001	5.30668e-12	6.1145e-11	371	371
SLC26A11	0.347917	5.37367e-12	6.1881e-11	371	371
C9orf109	0.34785	5.42724e-12	6.24258e-11	371	333
GPR172B	0.347801	5.46748e-12	6.28524e-11	371	292
TNIK	0.347781	5.48367e-12	6.30022e-11	371	370
FAM171A2	0.34775	5.509e-12	6.32567e-11	371	368
GAP43	0.347657	5.58577e-12	6.41012e-11	371	274
SPAG8	0.347639	5.60084e-12	6.42371e-11	371	367
ACER3	0.347617	5.61891e-12	6.44073e-11	371	371
LEFTY1	0.347536	5.68656e-12	6.51079e-11	371	356
FCGR2A	0.347527	5.69458e-12	6.51622e-11	371	371
FOXJ1	0.347482	5.73281e-12	6.55244e-11	371	319
MCRS1	0.347472	5.74147e-12	6.55858e-11	371	371
MXD3	0.347239	5.94305e-12	6.78107e-11	371	371
FBXO30	0.347142	6.02997e-12	6.87631e-11	371	371
PDSS1	0.347014	6.1456e-12	7.00416e-11	371	371
IFI27L2	0.346989	6.16844e-12	7.02215e-11	371	371
RNF8	0.346975	6.18068e-12	7.03207e-11	371	371
CD1A	0.346873	6.27471e-12	7.1309e-11	371	264
CCAR1	0.346841	6.30494e-12	7.16118e-11	371	371
CCDC150	0.346821	6.32407e-12	7.17881e-11	371	371
GPC5	0.346815	6.32953e-12	7.18092e-11	371	305
NFKBIE	0.346721	6.41775e-12	7.27272e-11	371	371
CDH10	0.346474	6.65717e-12	7.53975e-11	371	102
NOP56	0.346456	6.67451e-12	7.55509e-11	371	371
LRIG3	0.34642	6.71031e-12	7.5913e-11	371	371
EZR	0.346251	6.8801e-12	7.76135e-11	371	371
CLECL1	0.346098	7.03839e-12	7.92644e-11	371	333
UBE2D1	0.345942	7.20203e-12	8.10157e-11	371	371
C1orf113	0.345879	7.2699e-12	8.17331e-11	371	371
ARMC8	0.345855	7.29493e-12	8.19682e-11	371	371
SNRPB	0.345764	7.39466e-12	8.3042e-11	371	371
SPOCD1	0.345689	7.47647e-12	8.38661e-11	371	358
MEI1	0.345681	7.48524e-12	8.39173e-11	371	369
DUOX2	0.345534	7.64939e-12	8.57094e-11	371	346
C15orf21	0.345482	7.70862e-12	8.63244e-11	371	371
WDR6	0.345191	8.04589e-12	9.00001e-11	371	371
ZNF709	0.344952	8.33426e-12	9.30169e-11	371	371
PTPN23	0.344819	8.49958e-12	9.47558e-11	371	371
CXCL5	0.344774	8.55597e-12	9.53311e-11	371	297
PCNP	0.34469	8.66291e-12	9.64687e-11	371	371
ZBED2	0.344623	8.74887e-12	9.73715e-11	371	296
DOCK3	0.344606	8.76984e-12	9.75504e-11	371	367
ESR2	0.344572	8.8137e-12	9.79836e-11	371	350
DOK3	0.344319	9.14801e-12	1.01587e-10	371	371
ME2	0.344271	9.21221e-12	1.02243e-10	371	371
IARS	0.344183	9.33276e-12	1.03445e-10	371	371
C1orf77	0.344181	9.33608e-12	1.03445e-10	371	371
NDOR1	0.344153	9.37442e-12	1.03784e-10	371	371
DGKD	0.344151	9.37711e-12	1.03784e-10	371	371
EGFL6	0.344106	9.43886e-12	1.04351e-10	371	310
POU2AF1	0.343917	9.70464e-12	1.07171e-10	371	369
C10orf91	0.343828	9.8324e-12	1.08521e-10	371	158
FANCC	0.343751	9.94277e-12	1.09618e-10	371	371
PROKR1	0.343566	1.02169e-11	1.12268e-10	371	118
ZBTB2	0.343535	1.02635e-11	1.12718e-10	371	371
WHSC1L1	0.34351	1.03007e-11	1.13063e-10	371	371
C9orf80	0.343459	1.03784e-11	1.13853e-10	371	371
DHX15	0.343347	1.05497e-11	1.1567e-10	371	371
TUG1	0.343039	1.10365e-11	1.20874e-10	371	371
CBX5	0.343013	1.10787e-11	1.2127e-10	371	371
CLK2	0.342996	1.11057e-11	1.21498e-10	371	371
SFRS8	0.342856	1.1335e-11	1.23939e-10	371	371
EPPK1	0.342846	1.13528e-11	1.24065e-10	371	370
DBR1	0.342807	1.14174e-11	1.24702e-10	371	371
CECR7	0.342752	1.15095e-11	1.2564e-10	371	229
KDM1A	0.342684	1.16244e-11	1.26755e-10	371	371
TLE3	0.342637	1.17034e-11	1.27477e-10	371	371
SLC25A24	0.342487	1.19623e-11	1.30155e-10	371	371
ODF2	0.342441	1.20444e-11	1.30905e-10	371	371
UNC119	0.342326	1.22481e-11	1.33046e-10	371	371
FAM7A3	0.342216	1.24457e-11	1.35045e-10	371	269
NAA11	0.34221	1.24573e-11	1.35098e-10	371	118
LOC723809	0.342191	1.24918e-11	1.35366e-10	371	219
NCOR2	0.342189	1.24956e-11	1.35366e-10	371	371
APPL2	0.342071	1.27123e-11	1.37638e-10	371	371
RAP2B	0.341988	1.28658e-11	1.39225e-10	371	371
DPH2	0.341881	1.30688e-11	1.41345e-10	371	371
KCTD9	0.341791	1.32401e-11	1.43042e-10	371	371
GTF3C2	0.341776	1.32696e-11	1.43283e-10	371	371
PLCD4	0.341685	1.34477e-11	1.45049e-10	371	371
PLEK	0.341671	1.34742e-11	1.45256e-10	371	371
HIC2	0.341599	1.36152e-11	1.46696e-10	371	371
ADAMTS20	0.341317	1.41868e-11	1.52608e-10	371	108
C19orf61	0.34122	1.43878e-11	1.54603e-10	371	371
APOB48R	0.341175	1.44828e-11	1.5554e-10	371	371
FAM71D	0.341104	1.46322e-11	1.5706e-10	371	371
C8orf48	0.341092	1.46565e-11	1.57236e-10	371	349
APPL1	0.341059	1.4727e-11	1.57907e-10	371	371
B3GNT5	0.341011	1.48317e-11	1.58945e-10	371	371
FBXO46	0.341001	1.48525e-11	1.59081e-10	371	371
PIP5KL1	0.340947	1.49698e-11	1.60252e-10	371	307
GPR63	0.340879	1.51173e-11	1.61657e-10	371	236
GRHL1	0.340838	1.5208e-11	1.6254e-10	371	371
HSPA7	0.340705	1.55051e-11	1.65626e-10	371	371
ZNF98	0.340699	1.55186e-11	1.65681e-10	371	209
OSBPL7	0.340683	1.55541e-11	1.65972e-10	371	371
TYW3	0.340639	1.56527e-11	1.66934e-10	371	371
ANKRD26	0.34059	1.57642e-11	1.67944e-10	371	371
ZCCHC17	0.340567	1.58173e-11	1.68419e-10	371	371
UHRF2	0.340338	1.63506e-11	1.73912e-10	371	371
CSF1	0.340199	1.66848e-11	1.77372e-10	371	371
C15orf38	0.340115	1.68875e-11	1.7943e-10	371	371
GNAI3	0.340106	1.69102e-11	1.79576e-10	371	371
FAM55C	0.339968	1.7251e-11	1.82902e-10	371	371
TMTC3	0.33994	1.7321e-11	1.83547e-10	371	371
TLK2	0.33993	1.73465e-11	1.8372e-10	371	371
CLCN2	0.339926	1.73564e-11	1.83727e-10	371	371
DNAJC18	0.339831	1.75971e-11	1.86176e-10	371	371
SYNCRIP	0.339715	1.78942e-11	1.89219e-10	371	371
ABCB9	0.339702	1.79275e-11	1.8937e-10	371	371
ZNF70	0.339683	1.79775e-11	1.89798e-10	371	371
HPDL	0.339652	1.80567e-11	1.90533e-10	371	356
STXBP5	0.339348	1.88674e-11	1.98666e-10	371	371
WDR77	0.339328	1.89223e-11	1.99139e-10	371	371
CBL	0.339248	1.91413e-11	2.01337e-10	371	371
STAMBPL1	0.339114	1.9517e-11	2.05072e-10	371	371
PRR3	0.339102	1.95498e-11	2.05309e-10	371	371
PTPN7	0.339082	1.96075e-11	2.05807e-10	371	371
SMARCE1	0.339002	1.98342e-11	2.07967e-10	371	371
TMEM206	0.338783	2.04685e-11	2.14166e-10	371	371
EXOSC3	0.338778	2.04855e-11	2.14232e-10	371	371
ISL2	0.338707	2.06959e-11	2.16318e-10	371	293
ZNF131	0.338665	2.08205e-11	2.17507e-10	371	371
2022-09-02	0.338661	2.08321e-11	2.17514e-10	371	371
DUSP12	0.338539	2.12013e-11	2.21253e-10	371	371
WASF2	0.338442	2.15003e-11	2.24256e-10	371	371
RNPS1	0.338431	2.1533e-11	2.24479e-10	371	371
SUSD1	0.338425	2.15522e-11	2.24515e-10	371	371
SLC26A2	0.338423	2.1559e-11	2.24515e-10	371	371
KIAA1614	0.338379	2.16959e-11	2.25823e-10	371	366
ZNF92	0.338348	2.17917e-11	2.26702e-10	371	371
PFN2	0.338255	2.20854e-11	2.29637e-10	371	371
GTF2H1	0.338176	2.23372e-11	2.32135e-10	371	371
ZNF567	0.338164	2.23765e-11	2.32422e-10	371	370
CD80	0.338153	2.24131e-11	2.32681e-10	371	363
C11orf93	0.338131	2.24834e-11	2.33289e-10	371	367
QRICH1	0.338027	2.28208e-11	2.36666e-10	371	371
RGS2	0.337846	2.34229e-11	2.42532e-10	371	371
CD38	0.337819	2.35115e-11	2.43323e-10	371	370
PLXNC1	0.337799	2.35819e-11	2.43798e-10	371	361
TUBD1	0.337777	2.36567e-11	2.44444e-10	371	371
C3orf50	0.337731	2.38107e-11	2.45908e-10	371	164
C18orf45	0.337718	2.38548e-11	2.46235e-10	371	371
TCEAL5	0.337711	2.38795e-11	2.46364e-10	371	321
TMEM35	0.337631	2.41548e-11	2.49075e-10	371	275
PTPN22	0.337508	2.45867e-11	2.53266e-10	371	369
DCAF12	0.33748	2.46865e-11	2.54162e-10	371	371
CAPG	0.337406	2.49471e-11	2.56713e-10	371	371
CTLA4	0.337344	2.5169e-11	2.58862e-10	371	357
ATP13A2	0.337283	2.53916e-11	2.61017e-10	371	371
SYT6	0.337168	2.5815e-11	2.65233e-10	371	266
GPR109B	0.337105	2.60484e-11	2.67493e-10	371	356
FAM126A	0.33705	2.62521e-11	2.69446e-10	371	371
MYH15	0.336854	2.70003e-11	2.76983e-10	371	219
CSRNP3	0.336841	2.70518e-11	2.77368e-10	371	229
THOC2	0.336797	2.72213e-11	2.78819e-10	371	371
CCDC144NL	0.3364	2.88116e-11	2.93595e-10	371	101
ITPKA	0.336396	2.8826e-11	2.93595e-10	371	369
CSTF3	0.336389	2.88563e-11	2.93753e-10	371	371
AGPAT4	0.336339	2.90621e-11	2.95697e-10	371	371
CDK2AP1	0.336189	2.96915e-11	3.01793e-10	371	371
LOC341056	0.336147	2.98715e-11	3.03313e-10	371	370
TBC1D3	0.336076	3.01719e-11	3.06072e-10	371	371
CEP164	0.336076	3.0174e-11	3.06072e-10	371	371
PLEKHA2	0.336031	3.03678e-11	3.07881e-10	371	371
PAQR5	0.335979	3.0593e-11	3.10007e-10	371	367
USP28	0.335937	3.07784e-11	3.11727e-10	371	371
GRPEL2	0.335743	3.16398e-11	3.19801e-10	371	371
MTHFD2	0.335724	3.17287e-11	3.20537e-10	371	371
DEF6	0.335704	3.1815e-11	3.21246e-10	371	371
LYPD6B	0.33569	3.18795e-11	3.21734e-10	371	253
MAT2A	0.335668	3.19788e-11	3.22455e-10	371	371
ANKRD36B	0.335667	3.19833e-11	3.22455e-10	371	337
XPO7	0.335637	3.21222e-11	3.23691e-10	371	371
ZNF182	0.335612	3.22365e-11	3.24679e-10	371	371
CCR10	0.33553	3.26133e-11	3.28143e-10	371	365
DMBT1	0.335506	3.2726e-11	3.28944e-10	371	262
C17orf76	0.335482	3.28378e-11	3.29874e-10	371	369
RBM5	0.335479	3.28516e-11	3.29874e-10	371	371
FAM118A	0.335437	3.30511e-11	3.3171e-10	371	371
BBS7	0.335388	3.32831e-11	3.33774e-10	371	371
CNOT3	0.335386	3.32903e-11	3.33774e-10	371	371
ZNF860	0.335375	3.33441e-11	3.34146e-10	371	277
CLEC2D	0.335342	3.34979e-11	3.3538e-10	371	371
ADCY6	0.335342	3.3501e-11	3.3538e-10	371	371
TTLL7	0.33532	3.3605e-11	3.36252e-10	371	360
MAP7D1	0.335272	3.38358e-11	3.38077e-10	371	371
CKMT1B	0.335271	3.38382e-11	3.38077e-10	371	286
TAF4	0.335184	3.42593e-11	3.42113e-10	371	371
COL28A1	0.335133	3.45121e-11	3.44464e-10	371	217
METTL11B	0.335117	3.4591e-11	3.45078e-10	371	80
HIVEP3	0.33509	3.47237e-11	3.46229e-10	371	371
OXCT1	0.335058	3.48798e-11	3.47612e-10	371	371
PNRC2	0.335007	3.5135e-11	3.4998e-10	371	371
ZZZ3	0.334827	3.60419e-11	3.58553e-10	371	371
PARD6G	0.334826	3.60497e-11	3.58553e-10	371	371
ETAA1	0.334817	3.60978e-11	3.58852e-10	371	371
TLR10	0.334721	3.65893e-11	3.63557e-10	371	337
ADAM22	0.334683	3.679e-11	3.65369e-10	371	299
C2orf29	0.334606	3.71928e-11	3.69001e-10	371	371
AIM2	0.334578	3.73413e-11	3.7029e-10	371	334
NPEPPS	0.334426	3.81561e-11	3.78182e-10	371	371
C15orf48	0.334405	3.82685e-11	3.79108e-10	371	367
POFUT2	0.334386	3.8371e-11	3.79934e-10	371	371
BTF3L4	0.334334	3.86529e-11	3.82346e-10	371	371
GK5	0.334255	3.90925e-11	3.86501e-10	371	371
NXPH4	0.334165	3.95952e-11	3.91278e-10	371	368
IQGAP1	0.333986	4.06115e-11	4.01121e-10	371	371
GTPBP4	0.333968	4.07125e-11	4.01721e-10	371	371
C11orf61	0.333957	4.07766e-11	4.02155e-10	371	371
ANKRD13A	0.333934	4.09075e-11	4.03245e-10	371	371
C20orf118	0.333844	4.14325e-11	4.08017e-10	371	370
TRRAP	0.333837	4.14773e-11	4.08256e-10	371	371
ETV7	0.333828	4.15288e-11	4.08561e-10	371	371
MAPK7	0.33362	4.27691e-11	4.20555e-10	371	371
VTA1	0.333585	4.2982e-11	4.22441e-10	371	371
ASAP1	0.333546	4.32143e-11	4.24514e-10	371	371
C12orf56	0.333502	4.34843e-11	4.26956e-10	371	134
ARID3B	0.333485	4.35919e-11	4.27802e-10	371	371
PAG1	0.333373	4.42834e-11	4.34374e-10	371	371
DVWA	0.333018	4.65632e-11	4.56287e-10	371	165
RASSF8	0.332846	4.77033e-11	4.66999e-10	371	371
KCNK9	0.332843	4.77267e-11	4.66999e-10	371	261
NCBP1	0.332733	4.84738e-11	4.73845e-10	371	371
IP6K2	0.332595	4.94225e-11	4.82881e-10	371	371
CLSTN1	0.332574	4.95705e-11	4.8409e-10	371	371
TRIM6	0.332514	4.99892e-11	4.877e-10	371	370
ENAH	0.332504	5.0063e-11	4.88181e-10	371	371
NEURL1B	0.332356	5.11124e-11	4.97927e-10	371	371
ZNF142	0.33231	5.14452e-11	5.00925e-10	371	371
INTS7	0.332275	5.17045e-11	5.03204e-10	371	371
C5orf58	0.332214	5.21466e-11	5.07259e-10	371	310
KBTBD12	0.332187	5.23414e-11	5.08905e-10	371	178
SC65	0.33199	5.38187e-11	5.22758e-10	371	371
PELI1	0.331892	5.45605e-11	5.29705e-10	371	371
MED14	0.331821	5.51062e-11	5.34482e-10	371	371
MLL	0.331815	5.51567e-11	5.34711e-10	371	371
ATP1B3	0.331711	5.59653e-11	5.42226e-10	371	371
SOCS4	0.331708	5.59863e-11	5.42226e-10	371	371
HERC2P4	0.331676	5.62416e-11	5.44434e-10	371	271
ARHGAP18	0.331622	5.66719e-11	5.47669e-10	371	371
DFNA5	0.33162	5.66857e-11	5.47669e-10	371	371
PPM1G	0.331553	5.7224e-11	5.52601e-10	371	371
SP3	0.331541	5.73193e-11	5.53253e-10	371	371
ZNF202	0.331516	5.75197e-11	5.54919e-10	371	371
KITLG	0.331478	5.78254e-11	5.57328e-10	371	371
ZNF782	0.331451	5.80476e-11	5.592e-10	371	371
GLTP	0.331346	5.89109e-11	5.66968e-10	371	371
TTYH3	0.331225	5.99115e-11	5.76041e-10	371	371
ZNF644	0.331094	6.10232e-11	5.86164e-10	371	371
SNHG12	0.331029	6.15866e-11	5.90437e-10	371	371
ZCCHC8	0.330987	6.195e-11	5.93635e-10	371	371
TCP10	0.330862	6.30381e-11	6.03481e-10	371	165
KLHL17	0.330837	6.32591e-11	6.05307e-10	371	371
GIPR	0.330801	6.35785e-11	6.0807e-10	371	295
RCN2	0.330785	6.37274e-11	6.09203e-10	371	371
CDK19	0.33078	6.37645e-11	6.09264e-10	371	371
ELOVL4	0.330767	6.38842e-11	6.10116e-10	371	352
RTTN	0.330602	6.5374e-11	6.23746e-10	371	371
TMEM69	0.330541	6.59385e-11	6.2853e-10	371	371
CEP72	0.330534	6.60035e-11	6.28848e-10	371	371
ZBTB32	0.330519	6.61431e-11	6.29878e-10	371	353
DARS2	0.330443	6.68432e-11	6.35632e-10	371	371
SLC41A1	0.330405	6.72023e-11	6.38742e-10	371	371
ALG6	0.330251	6.86615e-11	6.523e-10	371	371
RGS1	0.330238	6.87907e-11	6.52905e-10	371	370
PCLO	0.330154	6.95975e-11	6.60248e-10	371	267
MMP14	0.330039	7.07302e-11	6.70356e-10	371	371
GTPBP3	0.330002	7.10911e-11	6.73136e-10	371	371
C3orf55	0.329904	7.20705e-11	6.81761e-10	371	169
CNOT2	0.32949	7.63478e-11	7.20854e-10	371	371
NBEAL2	0.329472	7.65495e-11	7.22387e-10	371	371
SNX7	0.329429	7.70091e-11	7.26065e-10	371	369
DAB2	0.329419	7.71139e-11	7.26709e-10	371	371
PLAC1	0.329316	7.82291e-11	7.3687e-10	371	171
DNMT3A	0.329278	7.86384e-11	7.40026e-10	371	371
RNF220	0.32923	7.91678e-11	7.44656e-10	371	371
CNGB3	0.329211	7.93728e-11	7.46231e-10	371	138
RG9MTD3	0.329205	7.94382e-11	7.46494e-10	371	371
SLITRK1	0.329129	8.02895e-11	7.53783e-10	371	92
2022-03-01	0.329049	8.11896e-11	7.61874e-10	371	367
RBM6	0.329015	8.15686e-11	7.6471e-10	371	371
ARMC3	0.328903	8.28469e-11	7.75964e-10	371	117
C10orf119	0.328793	8.41303e-11	7.87615e-10	371	371
TFRC	0.328769	8.44052e-11	7.89817e-10	371	371
ADD3	0.328751	8.46151e-11	7.91409e-10	371	371
SGTB	0.328663	8.56608e-11	7.99688e-10	371	371
C6orf134	0.328597	8.64464e-11	8.06267e-10	371	371
ARL17A	0.328495	8.76844e-11	8.1743e-10	371	371
KLC2	0.328319	8.98455e-11	8.37185e-10	371	371
LOC388152	0.328206	9.12616e-11	8.49585e-10	371	371
LOC100124692	0.328197	9.1378e-11	8.50272e-10	371	160
C11orf80	0.328143	9.20679e-11	8.55892e-10	371	371
TRPM2	0.328102	9.25914e-11	8.60358e-10	371	371
INTS4	0.327965	9.43685e-11	8.75644e-10	371	371
DMPK	0.327907	9.51247e-11	8.82251e-10	371	371
DPY19L2P1	0.327871	9.56013e-11	8.86259e-10	371	134
TSEN54	0.327775	9.68837e-11	8.97311e-10	371	371
IGF2BP2	0.327728	9.75121e-11	9.02293e-10	371	370
SCAMP5	0.327718	9.76501e-11	9.0315e-10	371	371
PCNT	0.327688	9.80498e-11	9.06426e-10	371	371
BRIX1	0.327661	9.84211e-11	9.09436e-10	371	371
ZNF80	0.327657	9.84769e-11	9.0953e-10	371	276
OPRL1	0.327588	9.94279e-11	9.17888e-10	371	370
FAT3	0.327357	1.02652e-10	9.46337e-10	371	356
FTSJ1	0.327188	1.05079e-10	9.68266e-10	371	371
C1orf204	0.32709	1.06505e-10	9.80493e-10	371	349
RNF186	0.326986	1.08051e-10	9.94272e-10	371	300
HDAC1	0.326916	1.09101e-10	1.003e-09	371	371
CSNK1E	0.326797	1.10894e-10	1.01854e-09	371	371
MX2	0.326706	1.12294e-10	1.03093e-09	371	371
CCDC112	0.326698	1.12421e-10	1.03162e-09	371	370
ARIH2	0.326605	1.13867e-10	1.04353e-09	371	371
GLS	0.326591	1.14096e-10	1.04506e-09	371	371
PARP1	0.326581	1.1425e-10	1.04584e-09	371	371
SFMBT1	0.326579	1.14286e-10	1.04584e-09	371	371
LASS6	0.326229	1.19923e-10	1.09542e-09	371	371
LOC440173	0.326155	1.21156e-10	1.10566e-09	371	175
MAML1	0.326113	1.21853e-10	1.11152e-09	371	371
TIFA	0.326086	1.22315e-10	1.11523e-09	371	371
PLCB1	0.325855	1.26261e-10	1.15015e-09	371	371
RAB38	0.325804	1.2714e-10	1.15762e-09	371	364
SLC2A5	0.325796	1.27282e-10	1.15839e-09	371	364
COMMD8	0.325754	1.28021e-10	1.16458e-09	371	371
LRIG2	0.325738	1.28307e-10	1.16665e-09	371	371
SMC3	0.325707	1.28855e-10	1.1711e-09	371	371
TET3	0.325684	1.29255e-10	1.17367e-09	371	371
HIST1H1B	0.325646	1.29935e-10	1.1793e-09	371	265
PTGER4	0.325601	1.30741e-10	1.18607e-09	371	371
LPAR5	0.325502	1.32525e-10	1.20117e-09	371	371
PGBD1	0.325475	1.33028e-10	1.20518e-09	371	371
WRN	0.325461	1.33271e-10	1.20683e-09	371	371
POC5	0.325304	1.36181e-10	1.2315e-09	371	371
UBXN2A	0.325188	1.38371e-10	1.25017e-09	371	371
FREM1	0.325168	1.38753e-10	1.25306e-09	371	274
ATP6V0D2	0.3249	1.43934e-10	1.29925e-09	371	340
ANAPC5	0.324891	1.44105e-10	1.30021e-09	371	371
DHX37	0.324819	1.4555e-10	1.31265e-09	371	371
FER1L5	0.324784	1.46247e-10	1.31834e-09	371	223
ZNF300	0.324709	1.47746e-10	1.33125e-09	371	368
RNF2	0.324658	1.48788e-10	1.34003e-09	371	371
CXXC1	0.324594	1.501e-10	1.35063e-09	371	371
APOBEC3A	0.324358	1.55024e-10	1.39242e-09	371	356
ICOS	0.324347	1.55256e-10	1.39387e-09	371	359
WDR82	0.324324	1.5573e-10	1.3975e-09	371	371
ITGAM	0.324272	1.56852e-10	1.40693e-09	371	371
U2AF1	0.32418	1.58838e-10	1.42411e-09	371	371
NLRP2	0.324016	1.6244e-10	1.45575e-09	371	330
FSIP1	0.324008	1.62605e-10	1.45657e-09	371	338
SIKE1	0.323975	1.63349e-10	1.46192e-09	371	371
CLIC1	0.323966	1.63555e-10	1.46311e-09	371	371
AP3M2	0.323892	1.65205e-10	1.47721e-09	371	371
TMEM155	0.323716	1.69212e-10	1.511e-09	371	243
OR13A1	0.32364	1.70989e-10	1.5255e-09	371	158
ANKRD58	0.323542	1.73274e-10	1.54519e-09	371	370
ISG20L2	0.323525	1.73675e-10	1.54808e-09	371	371
MTHFD1L	0.323482	1.74714e-10	1.55665e-09	371	371
USP21	0.323461	1.75202e-10	1.56029e-09	371	371
FAM135A	0.323452	1.75416e-10	1.5615e-09	371	371
EXTL2	0.323443	1.7563e-10	1.5627e-09	371	371
GRM4	0.32334	1.78106e-10	1.58332e-09	371	184
CCDC28B	0.323307	1.7891e-10	1.58976e-09	371	371
HNRPLL	0.323228	1.80852e-10	1.6063e-09	371	371
ZFP64	0.323199	1.81579e-10	1.61204e-09	371	371
NAP1L6	0.323192	1.81743e-10	1.61278e-09	371	178
SLC15A2	0.323169	1.82323e-10	1.6172e-09	371	370
ENOPH1	0.323052	1.85238e-10	1.6416e-09	371	371
ZNF713	0.322924	1.88491e-10	1.66746e-09	371	370
FAM118B	0.322826	1.91009e-10	1.68823e-09	371	371
MTCP1	0.322822	1.91135e-10	1.6886e-09	371	370
CPSF7	0.322743	1.93185e-10	1.70595e-09	371	371
ZFYVE16	0.322719	1.93816e-10	1.71001e-09	371	371
SYNGAP1	0.322661	1.95339e-10	1.72269e-09	371	371
DDX39	0.32256	1.98056e-10	1.74587e-09	371	371
PNCK	0.322505	1.99528e-10	1.7578e-09	371	226
IRAK1BP1	0.322466	2.0059e-10	1.76586e-09	371	365
MED22	0.322448	2.01095e-10	1.76953e-09	371	371
SPAG1	0.322441	2.01281e-10	1.77038e-09	371	371
TIGIT	0.322429	2.016e-10	1.77241e-09	371	368
SEPN1	0.322304	2.05053e-10	1.80197e-09	371	371
LOC388692	0.322206	2.07794e-10	1.82525e-09	371	371
PCNXL2	0.322187	2.08339e-10	1.82923e-09	371	371
PDZD7	0.322179	2.08554e-10	1.83032e-09	371	328
STRN4	0.322027	2.12905e-10	1.86768e-09	371	371
RUNX1	0.321951	2.151e-10	1.8861e-09	371	371
DMTF1	0.321944	2.15314e-10	1.88715e-09	371	371
C1orf186	0.321865	2.17635e-10	1.90665e-09	371	318
ABCC1	0.321855	2.17923e-10	1.90833e-09	371	371
PABPC1L	0.321803	2.19451e-10	1.92003e-09	371	371
SLC38A1	0.321743	2.21249e-10	1.9349e-09	371	371
PVRL1	0.321716	2.22048e-10	1.94104e-09	371	371
ZNF439	0.3217	2.22536e-10	1.94446e-09	371	370
BAT2L2	0.321661	2.23728e-10	1.95401e-09	371	371
KIF7	0.321584	2.26053e-10	1.97346e-09	371	371
MPHOSPH9	0.321571	2.26455e-10	1.9761e-09	371	371
ARL14	0.321538	2.27489e-10	1.98426e-09	371	316
EAF2	0.321455	2.30051e-10	2.00573e-09	371	371
SAP130	0.32144	2.30503e-10	2.00878e-09	371	371
AZI2	0.321432	2.30753e-10	2.01008e-09	371	371
CCDC138	0.321405	2.3159e-10	2.01591e-09	371	370
NUP62CL	0.321404	2.31624e-10	2.01591e-09	371	349
MAP3K15	0.321363	2.32927e-10	2.02636e-09	371	178
GNA13	0.321348	2.33399e-10	2.02958e-09	371	371
PLCH1	0.321336	2.33772e-10	2.03194e-09	371	352
C6orf170	0.321325	2.34125e-10	2.03412e-09	371	366
CASP8	0.321235	2.36979e-10	2.05802e-09	371	371
C16orf88	0.321231	2.37107e-10	2.05824e-09	371	371
MYADML2	0.321212	2.37721e-10	2.06266e-09	371	223
CCDC77	0.321197	2.38224e-10	2.06523e-09	371	371
RBM38	0.32115	2.39733e-10	2.07741e-09	371	371
IL27RA	0.321135	2.40216e-10	2.08069e-09	371	371
XPOT	0.321128	2.4043e-10	2.08164e-09	371	371
TRNP1	0.321122	2.40638e-10	2.08253e-09	371	371
DKC1	0.32107	2.42328e-10	2.09533e-09	371	371
LRRIQ1	0.32101	2.44296e-10	2.11052e-09	371	131
C3orf57	0.320989	2.44981e-10	2.11461e-09	371	335
VWA5B2	0.32098	2.45291e-10	2.11637e-09	371	324
ISY1	0.32088	2.48621e-10	2.14417e-09	371	371
CAND2	0.320827	2.50405e-10	2.15862e-09	371	371
ST6GALNAC4	0.320727	2.53803e-10	2.18602e-09	371	371
C4orf39	0.320717	2.54151e-10	2.18807e-09	371	241
ZNF204P	0.320707	2.54491e-10	2.19005e-09	371	363
WIPF1	0.320687	2.55192e-10	2.19513e-09	371	371
C1orf174	0.320642	2.56749e-10	2.20758e-09	371	371
C1orf104	0.320509	2.61376e-10	2.24543e-09	371	371
LOC400657	0.320469	2.62798e-10	2.25583e-09	371	371
SMURF2	0.320469	2.62814e-10	2.25583e-09	371	371
MARK2	0.320447	2.63566e-10	2.26131e-09	371	371
HMSD	0.320437	2.63952e-10	2.26365e-09	371	184
KBTBD2	0.320397	2.65367e-10	2.2748e-09	371	371
BANK1	0.32036	2.66673e-10	2.28502e-09	371	320
REEP2	0.320315	2.68317e-10	2.29811e-09	371	364
SSX4	0.320207	2.7224e-10	2.33071e-09	371	130
KLHL23	0.320202	2.7243e-10	2.33133e-09	371	364
GBP5	0.320147	2.74449e-10	2.3476e-09	371	371
SLC6A15	0.320063	2.77579e-10	2.37235e-09	371	99
DIP2B	0.319927	2.82688e-10	2.41394e-09	371	371
JRKL	0.319907	2.83446e-10	2.41937e-09	371	371
LAIR1	0.319868	2.84931e-10	2.43101e-09	371	371
HCG18	0.319812	2.87086e-10	2.44765e-09	371	371
MARS	0.319811	2.87128e-10	2.44765e-09	371	371
C9orf40	0.319761	2.89075e-10	2.46312e-09	371	371
CCDC93	0.319758	2.8919e-10	2.46312e-09	371	371
LOC730101	0.31975	2.89511e-10	2.4648e-09	371	371
MUTYH	0.319562	2.96899e-10	2.52554e-09	371	371
ADAM12	0.319552	2.97289e-10	2.52778e-09	371	369
LBR	0.319458	3.01067e-10	2.55734e-09	371	371
GLI1	0.31942	3.02614e-10	2.56758e-09	371	366
COPS7B	0.319412	3.02938e-10	2.56923e-09	371	371
TPR	0.319389	3.03864e-10	2.57536e-09	371	371
CORO6	0.319386	3.04012e-10	2.57536e-09	371	369
ST8SIA4	0.319385	3.04048e-10	2.57536e-09	371	371
DFNB31	0.319381	3.04229e-10	2.57579e-09	371	371
RNF145	0.319372	3.04573e-10	2.57761e-09	371	371
CXorf61	0.319365	3.04854e-10	2.57889e-09	371	69
MAGEA10	0.319357	3.05193e-10	2.58067e-09	371	70
UCP2	0.319318	3.06809e-10	2.59323e-09	371	371
GJA9	0.319291	3.07896e-10	2.60131e-09	371	357
STK31	0.31928	3.08378e-10	2.60428e-09	371	287
DCAF7	0.319268	3.08848e-10	2.60714e-09	371	371
CELSR3	0.319193	3.11977e-10	2.63061e-09	371	371
LILRB3	0.319074	3.16994e-10	2.67139e-09	371	369
STX3	0.318983	3.20895e-10	2.70197e-09	371	371
RAD51L1	0.318955	3.22105e-10	2.71027e-09	371	371
LOC256880	0.318954	3.22152e-10	2.71027e-09	371	321
UBAP2L	0.31894	3.22728e-10	2.71397e-09	371	371
CSF3R	0.318803	3.28726e-10	2.76324e-09	371	371
RUNDC1	0.318695	3.33519e-10	2.80235e-09	371	371
DNAJC10	0.318626	3.36596e-10	2.82701e-09	371	371
ANKRD22	0.318595	3.37991e-10	2.83753e-09	371	363
INTS2	0.318492	3.42687e-10	2.87332e-09	371	371
STX1A	0.31847	3.43705e-10	2.88064e-09	371	371
GJA3	0.318452	3.44535e-10	2.88639e-09	371	269
C8orf39	0.31826	3.53494e-10	2.95896e-09	371	356
FIP1L1	0.318201	3.56309e-10	2.98127e-09	371	371
UBE2J1	0.318018	3.65106e-10	3.05102e-09	371	371
CP110	0.317952	3.68366e-10	3.07698e-09	371	371
FAM98B	0.317907	3.70547e-10	3.0926e-09	371	371
USP14	0.317865	3.72664e-10	3.10767e-09	371	371
LOC400696	0.317849	3.73454e-10	3.11295e-09	371	223
KCTD6	0.317724	3.79716e-10	3.1625e-09	371	371
ALG10	0.317647	3.8364e-10	3.19385e-09	371	371
TP53BP1	0.317624	3.84834e-10	3.20245e-09	371	371
GNG5	0.317607	3.85677e-10	3.20813e-09	371	371
MYPN	0.3175	3.91234e-10	3.25163e-09	371	185
DDX46	0.31746	3.93316e-10	3.26621e-09	371	371
C12orf34	0.317287	4.02519e-10	3.33985e-09	371	371
RAB8B	0.31722	4.06125e-10	3.36697e-09	371	371
ACPL2	0.317163	4.09213e-10	3.39116e-09	371	371
CYB5RL	0.317143	4.10275e-10	3.3972e-09	371	371
LRRC41	0.317143	4.10283e-10	3.3972e-09	371	371
ALMS1	0.317054	4.15169e-10	3.43623e-09	371	371
SLC30A8	0.316812	4.28732e-10	3.54554e-09	371	119
MYO5A	0.316775	4.30868e-10	3.56024e-09	371	371
UTP11L	0.316693	4.35597e-10	3.59662e-09	371	371
EYA1	0.316692	4.35632e-10	3.59662e-09	371	181
ERC2	0.31666	4.37522e-10	3.61057e-09	371	247
PIP5K1A	0.316657	4.37684e-10	3.61057e-09	371	371
DGCR8	0.316536	4.44794e-10	3.66623e-09	371	371
NID1	0.316536	4.44798e-10	3.66623e-09	371	371
LPAR2	0.316526	4.4534e-10	3.66917e-09	371	371
TIGD1	0.3164	4.52879e-10	3.7282e-09	371	371
ZNF14	0.316223	4.63618e-10	3.81031e-09	371	369
ZNF488	0.316206	4.64678e-10	3.81745e-09	371	266
NUPL1	0.316203	4.64903e-10	3.81772e-09	371	371
HMGA2	0.316163	4.67378e-10	3.83488e-09	371	247
ZC3HAV1L	0.31603	4.75651e-10	3.90116e-09	371	311
CCT5	0.315983	4.78632e-10	3.924e-09	371	371
ARHGAP39	0.315978	4.78961e-10	3.92508e-09	371	371
C14orf80	0.315903	4.8372e-10	3.96082e-09	371	371
GLRB	0.31563	5.01544e-10	4.10003e-09	371	328
LAPTM4B	0.315612	5.02725e-10	4.10799e-09	371	371
SMTNL1	0.315577	5.05063e-10	4.12541e-09	371	321
SFXN3	0.315541	5.07464e-10	4.14073e-09	371	371
HMGXB3	0.315537	5.0777e-10	4.14073e-09	371	371
OLA1	0.315499	5.10306e-10	4.15834e-09	371	371
KIAA1024	0.315499	5.10347e-10	4.15834e-09	371	331
MED24	0.315461	5.12902e-10	4.17745e-09	371	371
RBM28	0.315397	5.17251e-10	4.21115e-09	371	371
HELZ	0.315381	5.18371e-10	4.21854e-09	371	371
IL2RG	0.315361	5.19702e-10	4.22765e-09	371	371
KCNN4	0.315353	5.203e-10	4.23078e-09	371	366
KDM4A	0.315289	5.24706e-10	4.26313e-09	371	371
ZNF682	0.315221	5.29432e-10	4.29745e-09	371	370
FUNDC1	0.315219	5.29578e-10	4.29745e-09	371	371
LOC440944	0.315201	5.30797e-10	4.30559e-09	371	371
CXCL3	0.315197	5.31101e-10	4.3063e-09	371	337
NCDN	0.315184	5.32012e-10	4.31194e-09	371	371
ENPP6	0.315145	5.34745e-10	4.33232e-09	371	325
C21orf99	0.315097	5.38176e-10	4.35658e-09	371	104
DCP1A	0.315047	5.41766e-10	4.38386e-09	371	371
SERAC1	0.315004	5.44816e-10	4.40675e-09	371	371
TIGD4	0.314983	5.46313e-10	4.41707e-09	371	305
TPM4	0.314893	5.52835e-10	4.46617e-09	371	371
HSN2	0.314857	5.55505e-10	4.48592e-09	371	344
VAMP1	0.314812	5.58846e-10	4.51108e-09	371	371
SH2D6	0.314757	5.6287e-10	4.54171e-09	371	289
TMEM45A	0.314722	5.6546e-10	4.56077e-09	371	371
XPO5	0.3147	5.67095e-10	4.5721e-09	371	371
AP4E1	0.314563	5.77506e-10	4.65415e-09	371	371
HNRNPUL2	0.3145	5.82271e-10	4.69066e-09	371	371
PI4KAP1	0.314403	5.8978e-10	4.7454e-09	371	371
EIF2C3	0.314369	5.92427e-10	4.76477e-09	371	371
CDC42SE2	0.314353	5.93692e-10	4.77301e-09	371	371
ASB11	0.314309	5.97114e-10	4.79859e-09	371	53
TEP1	0.3143	5.97803e-10	4.80026e-09	371	371
PLCG1	0.314247	6.0206e-10	4.83249e-09	371	371
DTX3	0.314182	6.07219e-10	4.86998e-09	371	371
ATN1	0.313957	6.25467e-10	5.01027e-09	371	371
C7orf29	0.313801	6.38384e-10	5.11169e-09	371	371
TRPA1	0.313717	6.45467e-10	5.16633e-09	371	229
CTHRC1	0.313603	6.55243e-10	5.24247e-09	371	371
FRS2	0.313492	6.64832e-10	5.31492e-09	371	371
ASXL1	0.313468	6.66952e-10	5.32973e-09	371	371
GLYATL2	0.313438	6.69569e-10	5.34849e-09	371	152
HAPLN3	0.313406	6.7238e-10	5.3688e-09	371	371
MTMR7	0.313344	6.77928e-10	5.41093e-09	371	371
TNFAIP8L3	0.313287	6.82973e-10	5.44683e-09	371	370
SCIN	0.31313	6.97183e-10	5.55571e-09	371	341
LOC254559	0.313083	7.01547e-10	5.58825e-09	371	352
IGSF1	0.312993	7.09858e-10	5.64768e-09	371	358
UBTF	0.312962	7.12706e-10	5.66807e-09	371	371
DGKA	0.312909	7.17675e-10	5.70532e-09	371	371
C6orf141	0.312603	7.47059e-10	5.93181e-09	371	333
ACAN	0.312595	7.47879e-10	5.93596e-09	371	350
CACYBP	0.31254	7.53245e-10	5.97378e-09	371	371
PGAP1	0.312525	7.54719e-10	5.98147e-09	371	371
TAS2R19	0.312524	7.54814e-10	5.98147e-09	371	171
ICA1L	0.312516	7.5561e-10	5.98539e-09	371	370
ICAM4	0.312453	7.61854e-10	6.03246e-09	371	362
FAM119A	0.31237	7.70218e-10	6.09626e-09	371	371
PIK3R6	0.312336	7.73625e-10	6.12079e-09	371	371
TFEC	0.312188	7.88739e-10	6.23542e-09	371	370
SFI1	0.312145	7.93206e-10	6.26825e-09	371	371
HFM1	0.31213	7.94683e-10	6.27743e-09	371	215
DENND2C	0.312068	8.01189e-10	6.32631e-09	371	371
C7orf44	0.312048	8.03225e-10	6.33736e-09	371	371
SH3PXD2B	0.311999	8.08472e-10	6.37624e-09	371	371
MMP9	0.311909	8.17995e-10	6.44879e-09	371	371
INPPL1	0.311601	8.51533e-10	6.70524e-09	371	371
NRIP3	0.311532	8.59177e-10	6.75755e-09	371	358
C11orf70	0.311227	8.9411e-10	7.01554e-09	371	234
MAGEE1	0.311196	8.97646e-10	7.04051e-09	371	369
PWWP2A	0.311188	8.9858e-10	7.04507e-09	371	371
ALX3	0.311163	9.01492e-10	7.06512e-09	371	359
C1orf84	0.311158	9.0209e-10	7.06521e-09	371	368
RNGTT	0.311157	9.02214e-10	7.06521e-09	371	371
COCH	0.31114	9.0427e-10	7.07853e-09	371	362
TMEM200C	0.311098	9.09174e-10	7.11133e-09	371	320
P2RY6	0.311009	9.19732e-10	7.18545e-09	371	371
MCM3APAS	0.311006	9.20193e-10	7.18624e-09	371	364
TPD52L2	0.310979	9.2333e-10	7.20791e-09	371	371
ZNF48	0.310932	9.29104e-10	7.25014e-09	371	371
CCT6A	0.310916	9.31031e-10	7.26233e-09	371	371
GCNT3	0.310903	9.32495e-10	7.27091e-09	371	357
GRB2	0.310808	9.44096e-10	7.3556e-09	371	371
BCOR	0.310792	9.46148e-10	7.36871e-09	371	371
ARID5B	0.310725	9.54392e-10	7.43001e-09	371	371
MFN1	0.310719	9.55097e-10	7.4326e-09	371	371
RAB28	0.31071	9.5625e-10	7.43866e-09	371	371
FLVCR1	0.31056	9.75073e-10	7.57804e-09	371	371
ZBTB5	0.310558	9.75308e-10	7.57804e-09	371	371
TTC4	0.310524	9.79694e-10	7.60915e-09	371	371
MNS1	0.310394	9.96289e-10	7.73201e-09	371	371
ADA	0.310389	9.96946e-10	7.73409e-09	371	371
[truncated: 10,765 more rows]
