# Supplementary material for: Analysis of the expression and prognostic significance of DDK complex in Hepatocarcinoma
Source: BMC Cancer. 2023 Jan 6;23:19. doi: 10.1186/s12885-022-10475-w (PMC9817372; doi:10.1186/s12885-022-10475-w)
Supplement: Supplementary file 3 — Additional file 3: Supplementary Table 2. Genes highly correlated with DBF4 in TCGA HCC database. [file 12885_2022_10475_MOESM3_ESM.xlsx]

## Sheet: lo_result_66975
Supplementary table 2. Genes highly correlated with DBF4 in TCGA HCC database
Symbol	Pearson Correlation Coefficient	P-value	FDR (BH)	Event_SD	Event_TD
DBF4	1	1e-79	1e-75	371	371
EZH2	0.785713	5.6271e-79	5.60515e-75	371	371
ANLN	0.761995	1.26893e-71	8.42656e-68	371	371
KIF11	0.749884	3.42301e-68	1.70483e-64	371	371
KIF18A	0.74922	5.21186e-68	2.07662e-64	371	371
C12orf48	0.747762	1.30438e-67	4.33097e-64	371	371
ERCC6L	0.74435	1.09011e-66	3.10246e-63	371	371
SGOL2	0.743438	1.9121e-66	4.76162e-63	371	371
KIF23	0.741133	7.82536e-66	1.73219e-62	371	371
BUB1B	0.740606	1.07728e-65	2.14616e-62	371	371
CDK1	0.739975	1.57885e-65	2.85945e-62	371	371
KIAA1524	0.738792	3.22375e-65	5.35196e-62	371	371
SGOL1	0.738261	4.43424e-65	6.79531e-62	371	369
C15orf42	0.738109	4.85858e-65	6.91376e-62	371	371
CDC25A	0.73778	5.91845e-65	7.8605e-62	371	371
FOXM1	0.735202	2.74582e-64	3.32788e-61	371	371
FANCD2	0.735145	2.83978e-64	3.32788e-61	371	371
CENPE	0.734058	5.39358e-64	5.9695e-61	371	371
CEP55	0.732887	1.07266e-63	1.12472e-60	371	371
TRIP13	0.729526	7.56247e-63	7.53298e-60	371	371
ARHGAP11A	0.724341	1.45444e-61	1.37978e-58	371	371
TTK	0.723563	2.2543e-61	2.04137e-58	371	371
GTSE1	0.721857	5.85645e-61	5.07271e-58	371	371
ECT2	0.72161	6.71978e-61	5.57798e-58	371	371
GSG2	0.718879	3.04724e-60	2.42828e-57	371	369
CENPA	0.717109	8.04244e-60	6.16236e-57	371	370
CDCA2	0.716301	1.24953e-59	9.21971e-57	371	371
TPX2	0.716103	1.3917e-59	9.90198e-57	371	371
HJURP	0.715574	1.85495e-59	1.27428e-56	371	371
KIF18B	0.715459	1.97411e-59	1.31094e-56	371	371
BUB1	0.715171	2.30722e-59	1.48272e-56	371	371
PRC1	0.713522	5.61756e-59	3.49728e-56	371	371
LMNB1	0.712995	7.45517e-59	4.50066e-56	371	371
KIF15	0.712134	1.18274e-58	6.93018e-56	371	371
KIF4A	0.711808	1.4073e-58	8.01036e-56	371	371
CDCA8	0.711368	1.78004e-58	9.85054e-56	371	371
GINS1	0.71086	2.33191e-58	1.25557e-55	371	371
NCAPG	0.709841	4.00382e-58	2.08758e-55	371	371
DLGAP5	0.709802	4.08671e-58	2.08758e-55	371	371
MKI67	0.707497	1.37592e-57	6.85278e-55	371	371
CCNB1	0.707286	1.53682e-57	7.46743e-55	371	371
POLQ	0.705956	3.07876e-57	1.46036e-54	371	370
SKA1	0.705467	3.96987e-57	1.83925e-54	371	371
SKA3	0.704388	6.94688e-57	3.14536e-54	371	371
MELK	0.702602	1.74399e-56	7.72082e-54	371	371
RAD51AP1	0.701834	2.58442e-56	1.11928e-53	371	371
MCM10	0.701201	3.5729e-56	1.51445e-53	371	370
MYBL2	0.698483	1.41958e-55	5.89185e-53	371	371
TOP2A	0.697903	1.90083e-55	7.72824e-53	371	371
CENPF	0.696648	3.57136e-55	1.42297e-52	371	371
KIF2C	0.694666	9.5956e-55	3.7483e-52	371	371
DEPDC1	0.692671	2.5754e-54	9.86675e-52	371	371
NCAPH	0.692203	3.24214e-54	1.21868e-51	371	371
FAM72B	0.691747	4.05664e-54	1.4966e-51	371	371
NUF2	0.691663	4.22837e-54	1.53159e-51	371	371
KIFC1	0.690842	6.32136e-54	2.24882e-51	371	371
NDC80	0.690545	7.30704e-54	2.55387e-51	371	371
XRCC2	0.690283	8.30596e-54	2.85295e-51	371	367
WDR62	0.689762	1.07061e-53	3.61505e-51	371	371
FAM54A	0.688651	1.8368e-53	6.0988e-51	371	370
NCAPG2	0.68828	2.19889e-53	7.09937e-51	371	371
MAD2L1	0.68827	2.20942e-53	7.09937e-51	371	371
WDHD1	0.6877	2.91073e-53	9.20436e-51	371	371
SMC4	0.686589	4.97145e-53	1.54752e-50	371	371
ZWINT	0.686267	5.80187e-53	1.77823e-50	371	371
KIF20A	0.685299	9.2273e-53	2.78525e-50	371	371
KPNA2	0.684584	1.29823e-52	3.86021e-50	371	371
DEPDC1B	0.683607	2.06686e-52	6.05529e-50	371	370
CCNB2	0.683372	2.31079e-52	6.67183e-50	371	371
PLK1	0.682989	2.77033e-52	7.88435e-50	371	371
FANCI	0.680693	8.18468e-52	2.29655e-49	371	371
PBK	0.679535	1.4074e-51	3.89418e-49	371	371
SPC25	0.679437	1.47351e-51	4.02127e-49	371	371
CENPK	0.678988	1.81677e-51	4.89104e-49	371	370
STIL	0.678697	2.08137e-51	5.52867e-49	371	371
CDCA4	0.678198	2.62428e-51	6.87908e-49	371	371
CCDC99	0.678084	2.76791e-51	7.16135e-49	371	371
NUP205	0.677434	3.74175e-51	9.45743e-49	371	371
EXO1	0.677429	3.75031e-51	9.45743e-49	371	371
NEK2	0.677377	3.84157e-51	9.56648e-49	371	371
PLK4	0.675682	8.40318e-51	2.04841e-48	371	371
MCM7	0.675675	8.43136e-51	2.04841e-48	371	371
TROAP	0.675251	1.0248e-50	2.45977e-48	371	371
ORC6L	0.673387	2.40559e-50	5.70526e-48	371	371
HELLS	0.673297	2.50627e-50	5.8741e-48	371	371
KNTC1	0.672957	2.9261e-50	6.77833e-48	371	371
CENPI	0.672644	3.37356e-50	7.72506e-48	371	362
CDCA5	0.670827	7.68685e-50	1.7402e-47	371	371
RACGAP1	0.67057	8.63092e-50	1.93197e-47	371	371
CKAP2L	0.670228	1.00684e-49	2.22869e-47	371	370
RRM2	0.66922	1.58459e-49	3.46904e-47	371	371
GPSM2	0.667602	3.26682e-49	7.07409e-47	371	371
ASPM	0.667233	3.85138e-49	8.25023e-47	371	371
UBE2C	0.666985	4.30103e-49	9.11544e-47	371	371
FAM72D	0.665737	7.4834e-49	1.56931e-46	371	370
UHRF1	0.665539	8.16893e-49	1.69522e-46	371	371
OIP5	0.665361	8.83484e-49	1.81451e-46	371	371
CDKN3	0.665134	9.76963e-49	1.98603e-46	371	371
C5orf34	0.663434	2.06478e-48	4.15501e-46	371	371
KIF14	0.663119	2.37037e-48	4.72226e-46	371	371
AURKB	0.661828	4.16712e-48	8.21953e-46	371	371
C4orf46	0.660589	7.14543e-48	1.3956e-45	371	371
KIF20B	0.658955	1.44896e-47	2.80254e-45	371	371
NUSAP1	0.658464	1.78975e-47	3.42841e-45	371	371
RAD54L	0.658318	1.90611e-47	3.61653e-45	371	371
CDC20	0.658105	2.08934e-47	3.92677e-45	371	371
CDCA3	0.653185	1.69782e-46	3.16112e-44	371	371
CDC7	0.653118	1.74686e-46	3.22231e-44	371	371
FBXO5	0.652777	2.0168e-46	3.68611e-44	371	371
WHSC1	0.652221	2.54791e-46	4.61449e-44	371	371
SUV39H2	0.650995	4.26126e-46	7.64799e-44	371	371
CASP2	0.650027	6.38448e-46	1.13564e-43	371	371
C11orf82	0.648852	1.04086e-45	1.83504e-43	371	371
CDC6	0.646069	3.28399e-45	5.73891e-43	371	371
ASF1B	0.644547	6.12556e-45	1.06116e-42	371	371
MCM6	0.644391	6.52865e-45	1.12124e-42	371	371
TACC3	0.644235	6.95806e-45	1.18477e-42	371	371
CDC45	0.643719	8.58628e-45	1.44963e-42	371	371
FANCB	0.643496	9.401e-45	1.57384e-42	371	364
E2F8	0.643436	9.63145e-45	1.59898e-42	371	370
PIF1	0.643107	1.10093e-44	1.81263e-42	371	371
ZWILCH	0.63993	3.97216e-44	6.48635e-42	371	371
DNMT1	0.637842	9.15388e-44	1.48263e-41	371	371
KIAA0101	0.637427	1.07992e-43	1.73502e-41	371	371
NCAPD2	0.637328	1.123e-43	1.7898e-41	371	371
RAD51	0.637306	1.13293e-43	1.79128e-41	371	371
RTKN2	0.637083	1.23791e-43	1.94186e-41	371	366
CENPL	0.636398	1.62483e-43	2.5289e-41	371	371
CCNF	0.636192	1.76303e-43	2.72273e-41	371	371
CLSPN	0.635754	2.09661e-43	3.21298e-41	371	363
BLM	0.633818	4.49374e-43	6.83392e-41	371	371
C9orf100	0.632217	8.40689e-43	1.2688e-40	371	371
FAM72A	0.631768	1.00159e-42	1.50028e-40	371	356
CENPH	0.631595	1.07149e-42	1.593e-40	371	371
E2F7	0.630139	1.88587e-42	2.78298e-40	371	370
MCM2	0.629454	2.45803e-42	3.60065e-40	371	371
ATAD5	0.62928	2.62874e-42	3.82261e-40	371	371
DTL	0.625898	9.62167e-42	1.38901e-39	371	371
FANCG	0.624472	1.6547e-41	2.37158e-39	371	371
EPR1	0.623307	2.57171e-41	3.65955e-39	371	368
CKS2	0.622759	3.16221e-41	4.46791e-39	371	371
ORC1L	0.621417	5.23909e-41	7.35022e-39	371	371
DNAJC9	0.619609	1.03003e-40	1.43499e-38	371	371
RFC4	0.619223	1.18918e-40	1.6452e-38	371	371
TRIM59	0.618146	1.77448e-40	2.43802e-38	371	370
KIAA1841	0.617263	2.46024e-40	3.35705e-38	371	371
CHAF1B	0.617226	2.49361e-40	3.37943e-38	371	371
ESCO2	0.616495	3.26635e-40	4.39677e-38	371	371
SPATS2	0.614867	5.94064e-40	7.88996e-38	371	371
MCM8	0.613968	8.2552e-40	1.08914e-37	371	371
TCF19	0.613178	1.10108e-39	1.44314e-37	371	371
C12orf32	0.613009	1.17102e-39	1.52478e-37	371	371
CIT	0.610372	3.04396e-39	3.93778e-37	371	371
E2F2	0.608747	5.45955e-39	7.01711e-37	371	371
CENPW	0.608393	6.19831e-39	7.91556e-37	371	371
C11orf84	0.607711	7.90969e-39	1.00367e-36	371	371
GINS4	0.607227	9.40054e-39	1.1853e-36	371	371
PHTF2	0.606737	1.11951e-38	1.4027e-36	371	371
HMMR	0.606247	1.33273e-38	1.65942e-36	371	371
C6orf167	0.60614	1.38411e-38	1.71268e-36	371	371
ILF3	0.605032	2.04982e-38	2.52077e-36	371	371
CCNA2	0.60444	2.52742e-38	3.08903e-36	371	371
SHCBP1	0.603519	3.49655e-38	4.24745e-36	371	371
UBE2T	0.603174	3.94724e-38	4.76588e-36	371	371
BEND3	0.603019	4.16866e-38	5.0029e-36	371	371
C1orf135	0.601188	7.9137e-38	9.44052e-36	371	371
PTTG1	0.600994	8.46916e-38	1.0043e-35	371	371
TYMS	0.599	1.69345e-37	1.98452e-35	371	371
BIRC5	0.598221	2.2171e-37	2.58299e-35	371	371
MTF2	0.597454	2.88929e-37	3.34654e-35	371	371
C17orf53	0.594248	8.66378e-37	9.97687e-35	371	371
RNF34	0.594121	9.04555e-37	1.03566e-34	371	371
SMARCD1	0.593671	1.05419e-36	1.20009e-34	371	371
CDC25C	0.59265	1.49074e-36	1.68742e-34	371	371
WDR76	0.592482	1.57801e-36	1.77611e-34	371	371
HMGB2	0.592373	1.63761e-36	1.83283e-34	371	371
NUP210	0.591801	1.98712e-36	2.21159e-34	371	371
CENPO	0.591757	2.01667e-36	2.23201e-34	371	368
LMNB2	0.591005	2.59895e-36	2.86056e-34	371	371
HSPA14	0.590874	2.71552e-36	2.97245e-34	371	371
ARHGAP11B	0.588592	5.83775e-36	6.35517e-34	371	338
PHF19	0.588249	6.54523e-36	7.08663e-34	371	371
FEN1	0.586781	1.06686e-35	1.14887e-33	371	371
CKAP2	0.585879	1.43828e-35	1.54051e-33	371	371
NUP107	0.585331	1.72406e-35	1.83672e-33	371	371
SRRT	0.584663	2.14951e-35	2.27779e-33	371	371
MCM4	0.584236	2.47337e-35	2.60712e-33	371	371
CKAP5	0.584162	2.53475e-35	2.65775e-33	371	371
XRCC3	0.58275	4.02829e-35	4.20166e-33	371	371
MCM3	0.582665	4.1416e-35	4.29734e-33	371	371
CDT1	0.582517	4.34745e-35	4.48756e-33	371	371
BRCA1	0.581989	5.16547e-35	5.27726e-33	371	371
C9orf140	0.58166	5.75178e-35	5.84627e-33	371	371
C21orf45	0.581098	6.90561e-35	6.98343e-33	371	371
TUBA1B	0.58051	8.36258e-35	8.41411e-33	371	371
CPSF6	0.580333	8.85502e-35	8.86481e-33	371	371
SASS6	0.579937	1.00713e-34	1.00321e-32	371	371
RAD1	0.57968	1.09435e-34	1.08466e-32	371	371
DSCC1	0.579347	1.21891e-34	1.20213e-32	371	371
DDX12	0.579243	1.26078e-34	1.2373e-32	371	371
CCNE2	0.578709	1.49806e-34	1.46296e-32	371	371
NEIL3	0.578495	1.60505e-34	1.55979e-32	371	368
LIN9	0.577927	1.92774e-34	1.86429e-32	371	371
ZNF273	0.575622	4.03637e-34	3.86599e-32	371	371
INCENP	0.575509	4.18391e-34	3.98813e-32	371	371
PRR11	0.573815	7.17548e-34	6.80714e-32	371	344
MSH2	0.573464	8.01883e-34	7.57114e-32	371	371
CCT6A	0.573172	8.79868e-34	8.26827e-32	371	371
CENPM	0.572906	9.56883e-34	8.94977e-32	371	371
DCLRE1B	0.572369	1.13426e-33	1.05592e-31	371	371
FBXO43	0.57144	1.52012e-33	1.40855e-31	371	370
CBX1	0.570969	1.76293e-33	1.62598e-31	371	371
STMN1	0.570912	1.79455e-33	1.64752e-31	371	371
C13orf34	0.570193	2.2493e-33	2.05553e-31	371	371
C18orf54	0.569167	3.10025e-33	2.82023e-31	371	370
PRKCI	0.569144	3.12252e-33	2.82758e-31	371	371
C1orf96	0.568283	4.08496e-33	3.68238e-31	371	371
PRIM2	0.568223	4.16242e-33	3.7353e-31	371	371
CEP78	0.567622	5.01727e-33	4.48225e-31	371	371
DBF4B	0.567226	5.67456e-33	5.04681e-31	371	371
TOPBP1	0.566501	7.10309e-33	6.28923e-31	371	371
SFPQ	0.565702	9.09394e-33	8.01635e-31	371	371
VRK1	0.565598	9.39206e-33	8.24267e-31	371	371
SENP1	0.56516	1.07478e-32	9.39116e-31	371	371
ACTL6A	0.56458	1.28507e-32	1.11796e-30	371	371
POLE2	0.564239	1.42713e-32	1.23615e-30	371	371
CHEK1	0.563022	2.07257e-32	1.78744e-30	371	371
SPAG5	0.562794	2.22194e-32	1.908e-30	371	371
ALS2CR4	0.562692	2.29228e-32	1.95995e-30	371	371
POLA1	0.562403	2.50407e-32	2.13082e-30	371	371
DNA2	0.562391	2.51352e-32	2.13082e-30	371	371
POLD1	0.560872	3.9906e-32	3.34036e-30	371	371
AURKA	0.560704	4.1999e-32	3.49375e-30	371	371
TRAIP	0.560697	4.20891e-32	3.49375e-30	371	371
UBA2	0.559228	6.56675e-32	5.42833e-30	371	371
H2AFZ	0.558638	7.84546e-32	6.45856e-30	371	371
USP1	0.557916	9.75106e-32	7.99426e-30	371	371
CDCA7	0.556885	1.32879e-31	1.08493e-29	371	370
EME1	0.556834	1.34917e-31	1.09707e-29	371	371
HAUS6	0.556692	1.40766e-31	1.13997e-29	371	371
CHAF1A	0.556217	1.62271e-31	1.30881e-29	371	371
TCERG1	0.555483	2.02012e-31	1.62278e-29	371	371
C15orf23	0.554497	2.70978e-31	2.16804e-29	371	371
H2AFX	0.554196	2.96268e-31	2.3609e-29	371	371
TTF2	0.554156	2.99871e-31	2.38009e-29	371	371
RFC5	0.553983	3.15671e-31	2.49555e-29	371	371
MYB	0.553572	3.5659e-31	2.8079e-29	371	357
TDG	0.552712	4.59908e-31	3.6072e-29	371	371
PKMYT1	0.552647	4.68803e-31	3.66255e-29	371	371
CBX3	0.552166	5.40316e-31	4.20475e-29	371	371
SPC24	0.551036	7.53422e-31	5.84034e-29	371	366
TMEM194A	0.550534	8.73186e-31	6.74249e-29	371	371
FANCE	0.550478	8.87551e-31	6.82695e-29	371	371
POLA2	0.548058	1.79917e-30	1.36806e-28	371	371
TIMELESS	0.54615	3.12903e-30	2.37021e-28	371	371
TET1	0.545764	3.49769e-30	2.63943e-28	371	371
KIF4B	0.545266	4.03812e-30	3.02434e-28	371	352
PTTG3P	0.544652	4.8184e-30	3.59521e-28	371	296
PLAGL2	0.544629	4.85086e-30	3.60592e-28	371	371
MTBP	0.54424	5.4243e-30	4.01721e-28	371	371
NAA25	0.544076	5.68575e-30	4.19524e-28	371	371
CDK4	0.54353	6.64837e-30	4.88741e-28	371	371
SAE1	0.543385	6.93064e-30	5.07618e-28	371	371
LIG1	0.542434	9.09562e-30	6.63747e-28	371	371
E2F1	0.54222	9.66853e-30	7.0298e-28	371	371
CENPQ	0.542176	9.79041e-30	7.09253e-28	371	371
ZNF107	0.541772	1.09849e-29	7.90041e-28	371	370
DONSON	0.541495	1.1887e-29	8.51847e-28	371	371
CDK2	0.541232	1.28114e-29	9.14797e-28	371	371
R3HDM1	0.54064	1.51546e-29	1.07825e-27	371	371
GMPS	0.540596	1.53444e-29	1.08787e-27	371	371
IQCB1	0.540299	1.66959e-29	1.17949e-27	371	371
E2F6	0.539727	1.96272e-29	1.38167e-27	371	371
RBL1	0.538877	2.49521e-29	1.7442e-27	371	371
CNOT6	0.537876	3.30778e-29	2.28811e-27	371	371
DDX11	0.537784	3.39447e-29	2.33995e-27	371	371
RCC2	0.53681	4.46133e-29	3.05728e-27	371	371
DDX55	0.536806	4.46576e-29	3.05728e-27	371	371
LOC100128191	0.536672	4.63727e-29	3.16383e-27	371	371
RECQL4	0.536548	4.80017e-29	3.26379e-27	371	371
ANKRD52	0.534243	9.12931e-29	6.14439e-27	371	371
YEATS2	0.534016	9.7208e-29	6.52047e-27	371	371
CENPJ	0.533525	1.11413e-28	7.42328e-27	371	371
NAA40	0.533098	1.25364e-28	8.32499e-27	371	371
ZNF93	0.532776	1.37058e-28	9.07133e-27	371	366
BRPF1	0.532242	1.58829e-28	1.04775e-26	371	371
PPP1CC	0.531939	1.72663e-28	1.13525e-26	371	371
KIF24	0.531468	1.96554e-28	1.28808e-26	371	371
SSRP1	0.530306	2.70506e-28	1.76112e-26	371	371
TMEM201	0.529998	2.94248e-28	1.90945e-26	371	371
PUS7	0.529806	3.10165e-28	2.0062e-26	371	371
DSN1	0.529552	3.32445e-28	2.13644e-26	371	371
FAM111B	0.528818	4.06317e-28	2.60278e-26	371	371
PSPH	0.528176	4.83893e-28	3.08978e-26	371	371
IKBIP	0.527421	5.94212e-28	3.77271e-26	371	371
ANKLE2	0.527418	5.94635e-28	3.77271e-26	371	371
AURKAPS1	0.527309	6.12505e-28	3.86149e-26	371	367
ATP2B1	0.527156	6.38406e-28	4.01209e-26	371	371
SMARCC1	0.526787	7.05694e-28	4.42102e-26	371	371
USP39	0.526188	8.29927e-28	5.18301e-26	371	371
ESPL1	0.52571	9.44174e-28	5.85976e-26	371	371
NUP188	0.524261	1.39488e-27	8.57681e-26	371	371
HAUS1	0.523802	1.57772e-27	9.67118e-26	371	371
PDE7A	0.523312	1.79927e-27	1.09954e-25	371	371
GINS3	0.522494	2.2389e-27	1.35986e-25	371	371
NEDD1	0.522053	2.51891e-27	1.52528e-25	371	371
RIBC2	0.522003	2.55255e-27	1.54097e-25	371	347
E2F3	0.521848	2.66016e-27	1.60108e-25	371	371
CCNE1	0.521341	3.04484e-27	1.8216e-25	371	371
XPO5	0.520982	3.34963e-27	1.99794e-25	371	371
HDAC2	0.520645	3.6637e-27	2.16583e-25	371	371
ARHGEF2	0.518978	5.69611e-27	3.33758e-25	371	371
MLF1IP	0.518734	6.07489e-27	3.54909e-25	371	371
SNHG1	0.51832	6.77541e-27	3.94678e-25	371	371
NCAPD3	0.51824	6.91939e-27	4.0189e-25	371	371
KIAA1731	0.517864	7.63933e-27	4.41132e-25	371	371
RAD54B	0.517076	9.39666e-27	5.41041e-25	371	371
DIAPH3	0.516626	1.05726e-26	6.06997e-25	371	371
NASP	0.516158	1.19493e-26	6.84061e-25	371	371
UBE2S	0.515517	1.41274e-26	8.0413e-25	371	371
PM20D2	0.514643	1.77402e-26	1.00403e-24	371	371
DKC1	0.512233	3.31367e-26	1.85958e-24	371	371
BRCA2	0.510898	4.67388e-26	2.61553e-24	371	368
HNRNPL	0.510689	4.93073e-26	2.75154e-24	371	371
C16orf59	0.510274	5.48538e-26	3.05251e-24	371	371
RFC3	0.509664	6.41391e-26	3.54938e-24	371	371
SMC2	0.509356	6.93947e-26	3.82959e-24	371	371
RBM17	0.508678	8.25177e-26	4.54121e-24	371	371
C7orf60	0.507358	1.15486e-25	6.30591e-24	371	371
FIGNL1	0.50674	1.35068e-25	7.35197e-24	371	371
ZNF92	0.5049	2.15078e-25	1.16434e-23	371	371
ATAD2	0.504582	2.33029e-25	1.25811e-23	371	371
CALU	0.504547	2.3507e-25	1.26478e-23	371	371
FAM64A	0.504379	2.45205e-25	1.31317e-23	371	369
MYBL1	0.503782	2.8493e-25	1.52182e-23	371	371
QSER1	0.503731	2.88569e-25	1.53713e-23	371	371
TCF3	0.503707	2.90317e-25	1.54232e-23	371	371
DNMT3B	0.503681	2.92229e-25	1.54835e-23	371	371
PSRC1	0.503143	3.34446e-25	1.76733e-23	371	371
RFWD3	0.502708	3.72922e-25	1.96544e-23	371	371
FBXO45	0.502072	4.37181e-25	2.29803e-23	371	371
MCM5	0.501441	5.11631e-25	2.68229e-23	371	371
RAN	0.50098	5.73915e-25	3.00093e-23	371	371
SLBP	0.500868	5.9005e-25	3.07722e-23	371	371
SET	0.500285	6.82098e-25	3.53874e-23	371	371
HAUS3	0.500214	6.94129e-25	3.5918e-23	371	371
GPD2	0.49994	7.43023e-25	3.82494e-23	371	371
MYO19	0.49944	8.40887e-25	4.30647e-23	371	371
METTL4	0.49939	8.51475e-25	4.34951e-23	371	371
KHSRP	0.499079	9.19463e-25	4.68479e-23	371	371
CHORDC1	0.498886	9.6452e-25	4.90183e-23	371	371
FAM83D	0.498369	1.09574e-24	5.55454e-23	371	371
POLD3	0.498277	1.12088e-24	5.66755e-23	371	371
CDC25B	0.497093	1.4998e-24	7.54521e-23	371	371
PPHLN1	0.4966	1.69264e-24	8.49391e-23	371	371
MASTL	0.496537	1.71919e-24	8.60543e-23	371	371
PRKCD	0.495796	2.0612e-24	1.02859e-22	371	371
CORO1C	0.494561	2.78639e-24	1.3843e-22	371	371
HNRNPA2B1	0.49442	2.88378e-24	1.42912e-22	371	371
ZBTB12	0.494061	3.14715e-24	1.55577e-22	371	371
LOC399815	0.493581	3.53644e-24	1.73958e-22	371	284
C2orf29	0.493525	3.58458e-24	1.75892e-22	371	371
CEP152	0.493119	3.95553e-24	1.93617e-22	371	371
SETD8	0.492621	4.46244e-24	2.17894e-22	371	371
MAPKAPK5	0.491922	5.28333e-24	2.57346e-22	371	371
PCNA	0.491499	5.8513e-24	2.83624e-22	371	371
SR140	0.490659	7.16357e-24	3.4639e-22	371	371
NCOA5	0.490624	7.22439e-24	3.4823e-22	371	371
ABI2	0.490617	7.23657e-24	3.4823e-22	371	371
SART3	0.489527	9.40078e-24	4.50198e-22	371	371
RRM1	0.489513	9.43145e-24	4.50583e-22	371	371
RBBP8	0.489364	9.77393e-24	4.65828e-22	371	371
TMPO	0.48897	1.07408e-23	5.10688e-22	371	371
MARCKS	0.488438	1.21973e-23	5.78558e-22	371	371
BAZ1B	0.488401	1.23039e-23	5.82231e-22	371	371
TRRAP	0.487707	1.45168e-23	6.83696e-22	371	371
BRIX1	0.487366	1.57445e-23	7.39769e-22	371	371
C16orf75	0.487018	1.71041e-23	8.0176e-22	371	371
RNASEH2A	0.486713	1.83886e-23	8.57934e-22	371	371
ANAPC7	0.486576	1.89955e-23	8.8418e-22	371	371
C20orf72	0.486564	1.90503e-23	8.84663e-22	371	371
UBAP2	0.48643	1.96663e-23	9.09032e-22	371	371
HNRNPA3	0.485679	2.34949e-23	1.08349e-21	371	371
RPAP3	0.485531	2.43287e-23	1.11934e-21	371	371
SMPD4	0.485431	2.49097e-23	1.14344e-21	371	371
SRPK1	0.484924	2.80792e-23	1.28008e-21	371	371
CD3EAP	0.484711	2.95258e-23	1.33989e-21	371	371
TRA2B	0.484109	3.40287e-23	1.54073e-21	371	371
NUP37	0.483744	3.70792e-23	1.67504e-21	371	371
SH3BP1	0.482493	4.97273e-23	2.22622e-21	371	371
NUP62	0.482431	5.0452e-23	2.2536e-21	371	371
RBM12	0.482359	5.13116e-23	2.28687e-21	371	371
RFC2	0.482096	5.45641e-23	2.42099e-21	371	371
NFKBIL2	0.481943	5.65507e-23	2.50356e-21	371	371
DCAF16	0.481834	5.80116e-23	2.56254e-21	371	371
LRRC1	0.481793	5.85689e-23	2.58144e-21	371	371
TAF6	0.481661	6.03952e-23	2.65605e-21	371	371
RALA	0.481383	6.44526e-23	2.82825e-21	371	371
NPC1	0.481252	6.64381e-23	2.90529e-21	371	371
C12orf41	0.481248	6.65e-23	2.90529e-21	371	371
GPR137C	0.48084	7.31342e-23	3.18814e-21	371	371
PRDM4	0.480609	7.71836e-23	3.35732e-21	371	371
C7orf68	0.48012	8.64635e-23	3.75278e-21	371	371
HNRNPU	0.480051	8.78728e-23	3.80566e-21	371	371
C19orf40	0.478482	1.26384e-22	5.40307e-21	371	371
PRIM1	0.478276	1.32539e-22	5.65407e-21	371	370
RELT	0.478063	1.39214e-22	5.92611e-21	371	371
TDP1	0.477926	1.43664e-22	6.10248e-21	371	371
SCML2	0.477225	1.68854e-22	7.14204e-21	371	371
CCT5	0.476507	1.99137e-22	8.40511e-21	371	371
ZNF765	0.476205	2.13437e-22	8.98963e-21	371	371
METTL6	0.476185	2.14422e-22	9.01204e-21	371	371
CSE1L	0.47589	2.29438e-22	9.62287e-21	371	371
SNRPD1	0.475697	2.39759e-22	1.00346e-20	371	371
C9orf40	0.475093	2.75276e-22	1.14729e-20	371	371
WASF1	0.475013	2.80386e-22	1.16615e-20	371	371
C4orf21	0.474188	3.38435e-22	1.39882e-20	371	371
ARL6IP6	0.473789	3.70599e-22	1.52543e-20	371	371
IGF2BP3	0.473443	4.00936e-22	1.6469e-20	371	371
PFKFB4	0.473433	4.01819e-22	1.64713e-20	371	371
KPNB1	0.473374	4.07259e-22	1.666e-20	371	371
RBM28	0.473358	4.08735e-22	1.66861e-20	371	371
WDR67	0.473271	4.16932e-22	1.69859e-20	371	371
U2AF2	0.473075	4.35932e-22	1.77238e-20	371	371
ZNF207	0.472956	4.47807e-22	1.80957e-20	371	371
ANKRD32	0.472069	5.4749e-22	2.20791e-20	371	371
SFRS3	0.471888	5.70325e-22	2.29536e-20	371	371
FAM40B	0.471643	6.02841e-22	2.42133e-20	371	371
CCDC18	0.471521	6.19663e-22	2.48389e-20	371	371
DVL3	0.471027	6.92677e-22	2.76417e-20	371	371
GINS2	0.47102	6.93748e-22	2.76417e-20	371	371
RAD18	0.47097	7.01732e-22	2.7904e-20	371	371
TEX10	0.470947	7.05403e-22	2.79941e-20	371	371
RBMX	0.470533	7.74312e-22	3.06068e-20	371	371
CKAP4	0.470513	7.77794e-22	3.06836e-20	371	371
DDN	0.469945	8.83631e-22	3.46529e-20	371	288
LIMK1	0.469828	9.07159e-22	3.55057e-20	371	371
KIF2A	0.469158	1.05434e-21	4.11047e-20	371	371
NRM	0.468958	1.10279e-21	4.29096e-20	371	371
ZNF473	0.468719	1.1633e-21	4.51759e-20	371	371
KCTD7	0.468501	1.22146e-21	4.73424e-20	371	371
RPIA	0.467962	1.37777e-21	5.31935e-20	371	371
FAM136A	0.467796	1.42952e-21	5.48477e-20	371	371
MND1	0.46779	1.43162e-21	5.48477e-20	371	371
C21orf58	0.467742	1.44703e-21	5.53317e-20	371	371
H2AFY	0.467391	1.56471e-21	5.97166e-20	371	371
SLC25A19	0.466924	1.7363e-21	6.58867e-20	371	371
DENR	0.466788	1.78957e-21	6.77792e-20	371	371
ZNF26	0.466568	1.87921e-21	7.10392e-20	371	371
PASK	0.466499	1.90814e-21	7.1996e-20	371	371
COMMD2	0.465058	2.62571e-21	9.8326e-20	371	371
YWHAQ	0.46461	2.89905e-21	1.08155e-19	371	371
SPIN4	0.464428	3.01795e-21	1.12381e-19	371	371
SLC37A3	0.4638	3.46583e-21	1.28818e-19	371	371
NCBP2	0.463139	4.00776e-21	1.48683e-19	371	371
HNRNPH1	0.462518	4.5929e-21	1.69444e-19	371	371
ZNF792	0.462422	4.6909e-21	1.7274e-19	371	371
RNF138	0.462097	5.03728e-21	1.85152e-19	371	371
C14orf106	0.461583	5.63629e-21	2.06788e-19	371	371
CA9	0.461485	5.75882e-21	2.10896e-19	371	305
ROD1	0.461225	6.09543e-21	2.21998e-19	371	371
STIP1	0.460613	6.96514e-21	2.5229e-19	371	371
FSD1L	0.460574	7.02476e-21	2.53988e-19	371	370
OSBPL3	0.460514	7.11759e-21	2.56878e-19	371	371
RNF24	0.460379	7.32953e-21	2.64049e-19	371	371
PAXIP1	0.460091	7.80404e-21	2.80635e-19	371	371
CTSL2	0.459914	8.11024e-21	2.91121e-19	371	355
IQGAP3	0.459545	8.78615e-21	3.13688e-19	371	371
C13orf23	0.459043	9.79727e-21	3.48538e-19	371	371
HIC2	0.458857	1.02003e-20	3.61583e-19	371	371
ZBTB34	0.458769	1.0397e-20	3.67901e-19	371	371
NCL	0.458673	1.0614e-20	3.74915e-19	371	371
RAB42	0.458512	1.09895e-20	3.87493e-19	371	363
MAPRE1	0.45846	1.11146e-20	3.91209e-19	371	371
INTS8	0.457599	1.33872e-20	4.67893e-19	371	371
CBFA2T2	0.457218	1.45338e-20	5.07079e-19	371	371
GTF3C2	0.457032	1.51281e-20	5.2689e-19	371	371
DLEU2	0.456876	1.56419e-20	5.42889e-19	371	371
DNAJC2	0.456302	1.76985e-20	6.12133e-19	371	371
CEP250	0.455431	2.13353e-20	7.31569e-19	371	371
AMD1	0.45537	2.16161e-20	7.39923e-19	371	371
MSH6	0.454358	2.68355e-20	9.09212e-19	371	371
MRE11A	0.453975	2.91163e-20	9.83145e-19	371	371
PHIP	0.453812	3.01479e-20	1.01625e-18	371	371
POM121C	0.453796	3.02532e-20	1.01808e-18	371	371
HSF2	0.453472	3.24141e-20	1.08896e-18	371	371
LARP4B	0.453222	3.41787e-20	1.14631e-18	371	371
GAS2L3	0.453214	3.4237e-20	1.14633e-18	371	349
EP400	0.453096	3.51056e-20	1.17148e-18	371	371
HNRPLL	0.45284	3.70746e-20	1.23512e-18	371	371
SUZ12P	0.452789	3.74718e-20	1.24627e-18	371	371
FOXK1	0.452495	3.98881e-20	1.32221e-18	371	371
BAT2	0.452437	4.0384e-20	1.33643e-18	371	371
CAD	0.45233	4.13099e-20	1.3648e-18	371	371
THOC1	0.452158	4.28412e-20	1.41305e-18	371	371
PRMT3	0.451905	4.51997e-20	1.48592e-18	371	371
GTPBP4	0.451847	4.57612e-20	1.5019e-18	371	371
NUP155	0.451712	4.7086e-20	1.54284e-18	371	371
SMCHD1	0.451432	4.99525e-20	1.63408e-18	371	371
PTBP1	0.45106	5.40405e-20	1.75914e-18	371	371
SLC12A9	0.451036	5.43175e-20	1.76527e-18	371	371
REEP4	0.451025	5.44357e-20	1.76623e-18	371	371
ZMYM3	0.450728	5.79587e-20	1.87444e-18	371	371
KIAA0528	0.450451	6.14481e-20	1.97766e-18	371	371
UBE2N	0.450333	6.29932e-20	2.02411e-18	371	371
RNASEN	0.450149	6.54878e-20	2.10088e-18	371	371
SFRS1	0.450025	6.72164e-20	2.15287e-18	371	371
CCDC88A	0.449936	6.84903e-20	2.18664e-18	371	371
NUP43	0.449738	7.13935e-20	2.27568e-18	371	371
HSF2BP	0.449659	7.25958e-20	2.31031e-18	371	368
DRP2	0.449549	7.42893e-20	2.36043e-18	371	257
DMTF1	0.449299	7.82904e-20	2.47965e-18	371	371
ZNF195	0.449019	8.30342e-20	2.62157e-18	371	371
CCDC138	0.448815	8.66576e-20	2.73163e-18	371	370
STK4	0.447755	1.08178e-19	3.38324e-18	371	371
TUBG1	0.446779	1.32583e-19	4.13351e-18	371	371
SFRS2	0.446483	1.4099e-19	4.38191e-18	371	371
CCDC14	0.446475	1.41245e-19	4.38299e-18	371	371
XPOT	0.446113	1.5227e-19	4.71775e-18	371	371
PKM2	0.44607	1.53632e-19	4.75256e-18	371	371
TRMT6	0.445717	1.65325e-19	5.10637e-18	371	371
DCLRE1C	0.445163	1.85444e-19	5.71008e-18	371	371
STX1A	0.444974	1.92838e-19	5.92859e-18	371	371
FUS	0.444837	1.98372e-19	6.08932e-18	371	371
RAET1K	0.444544	2.10744e-19	6.44922e-18	371	286
SUPT16H	0.444509	2.12267e-19	6.48332e-18	371	371
RACGAP1P	0.444504	2.12509e-19	6.48332e-18	371	295
MMD	0.444451	2.14822e-19	6.54386e-18	371	371
SFRS9	0.444424	2.16027e-19	6.57051e-18	371	371
ESCO1	0.444385	2.17801e-19	6.61127e-18	371	371
ZNF519	0.44438	2.1803e-19	6.61127e-18	371	367
KHDRBS1	0.444273	2.22909e-19	6.74893e-18	371	371
FNBP4	0.4442	2.26258e-19	6.83993e-18	371	371
C14orf145	0.444039	2.33917e-19	7.06074e-18	371	370
LOC647946	0.443619	2.5508e-19	7.6763e-18	371	276
CCT2	0.443607	2.55719e-19	7.6839e-18	371	371
PLXNA1	0.442868	2.97714e-19	8.93232e-18	371	371
RAVER1	0.442738	3.05743e-19	9.1594e-18	371	371
UBE2E1	0.442657	3.10884e-19	9.29944e-18	371	371
DHX9	0.442343	3.3156e-19	9.88824e-18	371	371
USP37	0.442259	3.37322e-19	1.0045e-17	371	371
MDC1	0.442181	3.4278e-19	1.01923e-17	371	371
G2E3	0.442134	3.46067e-19	1.02747e-17	371	371
DOT1L	0.441781	3.72009e-19	1.10285e-17	371	371
CDCA7L	0.441393	4.02812e-19	1.19239e-17	371	371
SUZ12	0.441145	4.23737e-19	1.25247e-17	371	371
TIPIN	0.44066	4.67854e-19	1.37675e-17	371	371
UCK2	0.440225	5.11212e-19	1.49331e-17	371	371
HNRNPR	0.440044	5.30386e-19	1.54705e-17	371	371
UTP20	0.43992	5.43972e-19	1.57974e-17	371	371
DYNC1LI1	0.439753	5.62747e-19	1.62951e-17	371	371
ZNF643	0.439439	5.99885e-19	1.73037e-17	371	370
NAP1L1	0.439297	6.1738e-19	1.77738e-17	371	371
MTMR2	0.439176	6.32753e-19	1.81901e-17	371	371
DR1	0.439036	6.5107e-19	1.86897e-17	371	371
HMGA2	0.438694	6.97763e-19	1.99438e-17	371	247
HAUS2	0.438686	6.98898e-19	1.99476e-17	371	371
ARID3A	0.438509	7.24441e-19	2.06471e-17	371	371
RBM14	0.438112	7.85103e-19	2.23121e-17	371	371
ZBED4	0.438051	7.94835e-19	2.25566e-17	371	371
G6PD	0.438026	7.98762e-19	2.26358e-17	371	371
PSMC3IP	0.437771	8.41114e-19	2.37683e-17	371	371
PRELID2	0.437688	8.55215e-19	2.41326e-17	371	371
PA2G4P4	0.437494	8.89529e-19	2.50299e-17	371	371
CDK16	0.437418	9.03224e-19	2.53794e-17	371	371
C11orf93	0.437396	9.07302e-19	2.54581e-17	371	367
ZNF530	0.437206	9.42718e-19	2.63776e-17	371	371
GLMN	0.437007	9.81235e-19	2.73784e-17	371	371
PURB	0.436987	9.85162e-19	2.74495e-17	371	371
PRPF39	0.436755	1.03226e-18	2.87217e-17	371	371
HCFC1	0.436643	1.05593e-18	2.93392e-17	371	371
C9orf110	0.43656	1.07378e-18	2.96674e-17	371	350
HAUS8	0.436553	1.07519e-18	2.96674e-17	371	371
PDGFRL	0.436507	1.08511e-18	2.98998e-17	371	371
MTA2	0.436317	1.12744e-18	3.10234e-17	371	371
ZBTB2	0.436212	1.15147e-18	3.16185e-17	371	371
SKP2	0.436209	1.15224e-18	3.16185e-17	371	371
POGK	0.436176	1.15993e-18	3.17857e-17	371	371
NOP56	0.436153	1.16533e-18	3.18896e-17	371	371
RNFT2	0.435862	1.23553e-18	3.37644e-17	371	370
HNRNPUL1	0.435576	1.30853e-18	3.57103e-17	371	371
DZIP1L	0.435398	1.35605e-18	3.69061e-17	371	369
TCOF1	0.43509	1.44225e-18	3.91452e-17	371	371
SALL4	0.434807	1.52648e-18	4.13188e-17	371	329
RNF8	0.434624	1.58311e-18	4.27933e-17	371	371
MPP2	0.4344	1.65563e-18	4.46326e-17	371	354
TRIM28	0.433996	1.795e-18	4.82592e-17	371	371
BRIP1	0.433962	1.80705e-18	4.85175e-17	371	368
C7orf44	0.433834	1.85398e-18	4.96437e-17	371	371
MFI2	0.433375	2.03144e-18	5.43225e-17	371	366
HNRNPH3	0.433166	2.11757e-18	5.65498e-17	371	371
RCAN3	0.433152	2.1238e-18	5.66403e-17	371	365
HNRNPA3P1	0.43298	2.19762e-18	5.85309e-17	371	371
CABLES2	0.432776	2.28837e-18	6.08663e-17	371	371
COPS7B	0.432525	2.40572e-18	6.39024e-17	371	371
TMEM65	0.432439	2.44698e-18	6.477e-17	371	371
TUBA1C	0.432308	2.51135e-18	6.62664e-17	371	371
IL12A	0.432248	2.54136e-18	6.69696e-17	371	331
SFRS13B	0.432171	2.58049e-18	6.79109e-17	371	368
MEP1A	0.432066	2.63487e-18	6.92501e-17	371	314
DEK	0.432059	2.63833e-18	6.92501e-17	371	371
KCNMB3	0.431918	2.71345e-18	7.10348e-17	371	371
HAUS5	0.431688	2.84005e-18	7.42512e-17	371	371
ZDHHC13	0.431158	3.15388e-18	8.23481e-17	371	371
C7orf49	0.430975	3.27024e-18	8.52744e-17	371	371
DNM1L	0.430948	3.28721e-18	8.5605e-17	371	371
RNF216	0.430893	3.32339e-18	8.64341e-17	371	371
BAZ2A	0.430505	3.58762e-18	9.29423e-17	371	371
GCN1L1	0.430481	3.60503e-18	9.3272e-17	371	371
APAF1	0.430213	3.80046e-18	9.80735e-17	371	371
SIP1	0.429928	4.02023e-18	1.03611e-16	371	371
XPO1	0.429729	4.18011e-18	1.07592e-16	371	371
TRPC1	0.429675	4.22536e-18	1.08616e-16	371	370
DNMT3A	0.429643	4.25146e-18	1.09146e-16	371	371
ACIN1	0.429581	4.30408e-18	1.10355e-16	371	371
ARID3B	0.42957	4.31348e-18	1.10454e-16	371	371
UPF3B	0.428635	5.1822e-18	1.32529e-16	371	371
GPR19	0.428426	5.39907e-18	1.37545e-16	371	369
LOC339674	0.428399	5.4274e-18	1.3809e-16	371	279
LOC388152	0.428342	5.48884e-18	1.39475e-16	371	371
SFRS7	0.428266	5.57145e-18	1.41214e-16	371	371
PMS1	0.428242	5.59727e-18	1.41689e-16	371	371
DDX39	0.428233	5.60723e-18	1.4176e-16	371	371
FARSB	0.427451	6.53391e-18	1.64147e-16	371	371
HNRNPA1L2	0.427247	6.79853e-18	1.7058e-16	371	371
H2AFV	0.427074	7.03159e-18	1.76205e-16	371	371
CNOT3	0.426849	7.34792e-18	1.8344e-16	371	371
TYRO3	0.426743	7.5013e-18	1.86801e-16	371	371
UHRF1BP1	0.426611	7.69593e-18	1.91409e-16	371	371
PKIA	0.426515	7.842e-18	1.94799e-16	371	326
EED	0.426181	8.36734e-18	2.07331e-16	371	371
PLBD1	0.425976	8.70822e-18	2.1551e-16	371	371
ZNF8	0.425675	9.23194e-18	2.27904e-16	371	371
HCG18	0.425421	9.6988e-18	2.38838e-16	371	371
CREB1	0.425016	1.0491e-17	2.57075e-16	371	371
C3orf63	0.424672	1.12129e-17	2.73086e-16	371	371
CPSF4	0.424633	1.12974e-17	2.74807e-16	371	371
STRN4	0.424582	1.14102e-17	2.77212e-16	371	371
DPY19L2P2	0.424385	1.18537e-17	2.86938e-16	371	351
OTX1	0.424274	1.21091e-17	2.92763e-16	371	327
PPM1G	0.424213	1.22546e-17	2.95922e-16	371	371
RBM12B	0.424198	1.22894e-17	2.96403e-16	371	371
PLEKHG2	0.424114	1.24889e-17	3.00851e-16	371	371
TK1	0.423822	1.32148e-17	3.1757e-16	371	371
DHX37	0.423559	1.39009e-17	3.33655e-16	371	371
TRAFD1	0.422892	1.58058e-17	3.78466e-16	371	371
MST4	0.422803	1.60797e-17	3.84561e-16	371	371
BARD1	0.422738	1.62818e-17	3.88929e-16	371	347
CCDC41	0.42266	1.65287e-17	3.94354e-16	371	371
ERI1	0.422653	1.6549e-17	3.94364e-16	371	371
SUDS3	0.422357	1.75179e-17	4.16458e-16	371	371
ZNF124	0.422101	1.83997e-17	4.36899e-16	371	371
IFRD1	0.421821	1.94146e-17	4.59355e-16	371	371
NUDT1	0.421678	1.99529e-17	4.71533e-16	371	371
FBXO41	0.421656	2.00404e-17	4.73038e-16	371	370
CEP72	0.421278	2.15432e-17	5.07544e-16	371	371
CEP192	0.421275	2.15532e-17	5.07544e-16	371	371
KIN	0.421224	2.17644e-17	5.11912e-16	371	371
FAM122B	0.421193	2.1896e-17	5.144e-16	371	371
DLL3	0.421048	2.25112e-17	5.2761e-16	371	139
ZCCHC3	0.420889	2.32038e-17	5.4193e-16	371	371
MCM3APAS	0.420705	2.40344e-17	5.60672e-16	371	364
RCE1	0.420286	2.60365e-17	6.05956e-16	371	371
GGCT	0.420185	2.65435e-17	6.16316e-16	371	371
GTPBP2	0.420045	2.72611e-17	6.31507e-16	371	371
UBE2D1	0.419986	2.75665e-17	6.37839e-16	371	371
MEX3A	0.41981	2.85072e-17	6.57316e-16	371	371
CHML	0.419141	3.23765e-17	7.44808e-16	371	371
CEP135	0.418695	3.52325e-17	8.09321e-16	371	371
CHTF18	0.418613	3.57836e-17	8.20345e-16	371	371
DDHD1	0.418291	3.80382e-17	8.71032e-16	371	371
WDR75	0.417625	4.31467e-17	9.84614e-16	371	371
SNRPB	0.417196	4.67878e-17	1.06283e-15	371	371
LSM14B	0.417011	4.84518e-17	1.09938e-15	371	371
PRKDC	0.416918	4.93068e-17	1.11751e-15	371	371
VHL	0.416866	4.97901e-17	1.12381e-15	371	371
PPAT	0.416864	4.98105e-17	1.12381e-15	371	371
KIAA1009	0.41673	5.10833e-17	1.15122e-15	371	371
C13orf37	0.415958	5.9071e-17	1.32973e-15	371	371
RDM1	0.415844	6.03457e-17	1.35689e-15	371	349
SNRPA1	0.415475	6.46851e-17	1.45119e-15	371	371
CCDC6	0.415297	6.68772e-17	1.497e-15	371	371
NRAS	0.415288	6.69887e-17	1.49781e-15	371	371
NFE2L3	0.415183	6.83233e-17	1.52594e-15	371	371
CCDC34	0.415121	6.912e-17	1.542e-15	371	371
C5orf22	0.414861	7.25697e-17	1.61715e-15	371	371
MEX3C	0.414795	7.34657e-17	1.63529e-15	371	371
KIAA0907	0.414459	7.8244e-17	1.73971e-15	371	371
PA2G4	0.414358	7.97366e-17	1.77092e-15	371	371
SUV420H2	0.41408	8.39846e-17	1.86111e-15	371	371
ANP32E	0.413607	9.17294e-17	2.02598e-15	371	371
CNIH2	0.413306	9.70229e-17	2.14004e-15	371	367
ZNF296	0.413301	9.71086e-17	2.14004e-15	371	371
TMEM206	0.413008	1.02551e-16	2.24943e-15	371	371
CSTF2	0.413004	1.02637e-16	2.24943e-15	371	371
GGA3	0.412938	1.03906e-16	2.27474e-15	371	371
HNRNPD	0.412925	1.04154e-16	2.27766e-15	371	371
MPP6	0.412871	1.05199e-16	2.298e-15	371	371
URB2	0.412144	1.20413e-16	2.62172e-15	371	371
ZNF85	0.412065	1.22205e-16	2.65492e-15	371	369
IARS	0.411919	1.25545e-16	2.72452e-15	371	371
TTLL4	0.411849	1.2719e-16	2.75721e-15	371	371
NRF1	0.411807	1.28196e-16	2.776e-15	371	371
TET3	0.411786	1.28694e-16	2.78377e-15	371	371
VRK2	0.41169	1.30991e-16	2.83037e-15	371	371
KLHDC5	0.411563	1.34107e-16	2.89456e-15	371	371
IGF2BP2	0.411529	1.34972e-16	2.91008e-15	371	370
C3orf34	0.410673	1.58102e-16	3.39407e-15	371	371
DCP2	0.410527	1.6243e-16	3.48325e-15	371	371
SALL2	0.410325	1.68598e-16	3.60388e-15	371	369
PAFAH1B3	0.409948	1.80731e-16	3.85082e-15	371	371
LOC147804	0.409785	1.86243e-16	3.95922e-15	371	371
KIAA0226	0.40978	1.86414e-16	3.95922e-15	371	371
C7orf36	0.409616	1.92106e-16	4.06709e-15	371	371
CAND1	0.40958	1.93382e-16	4.08976e-15	371	371
POP1	0.409213	2.06902e-16	4.36181e-15	371	371
NDE1	0.40911	2.10839e-16	4.44009e-15	371	371
SAAL1	0.408744	2.25493e-16	4.73368e-15	371	371
MAPK13	0.408736	2.25825e-16	4.73567e-15	371	371
SLC36A1	0.408352	2.42303e-16	5.07054e-15	371	371
THOC2	0.407711	2.72467e-16	5.68386e-15	371	371
CNTNAP1	0.407626	2.76727e-16	5.76669e-15	371	371
SLMO2	0.407483	2.84055e-16	5.90703e-15	371	371
NAT10	0.407201	2.99072e-16	6.20638e-15	371	371
KBTBD2	0.407046	3.07656e-16	6.36461e-15	371	371
CCDC93	0.406633	3.31682e-16	6.85453e-15	371	371
PRPF38B	0.406619	3.32545e-16	6.86525e-15	371	371
SNHG4	0.40656	3.36131e-16	6.9321e-15	371	321
DYRK2	0.406497	3.39987e-16	7.00437e-15	371	371
SETD5	0.406426	3.44443e-16	7.08883e-15	371	371
RIT1	0.406394	3.46412e-16	7.122e-15	371	371
TAF1B	0.406342	3.49756e-16	7.18334e-15	371	371
STX6	0.406142	3.62691e-16	7.44133e-15	371	371
ARHGAP33	0.406085	3.66453e-16	7.51078e-15	371	371
FANCM	0.40563	3.9808e-16	8.12556e-15	371	371
IGSF1	0.405407	4.14504e-16	8.44351e-15	371	358
TRIM71	0.405271	4.24819e-16	8.64201e-15	371	201
RPA1	0.405268	4.25116e-16	8.64201e-15	371	371
NFYA	0.405165	4.33089e-16	8.79511e-15	371	371
RAD21	0.405142	4.34921e-16	8.81434e-15	371	371
ABCC10	0.404981	4.47768e-16	9.06549e-15	371	371
SEH1L	0.404899	4.54487e-16	9.19217e-15	371	371
UBXN2A	0.404753	4.66689e-16	9.42938e-15	371	371
POM121	0.404681	4.72774e-16	9.54265e-15	371	371
THOC4	0.404616	4.78368e-16	9.63604e-15	371	371
TAF4	0.404514	4.87307e-16	9.80619e-15	371	371
HMGA1	0.404217	5.1419e-16	1.03367e-14	371	371
ZNF431	0.404066	5.2834e-16	1.06056e-14	371	371
ASRGL1	0.404063	5.2863e-16	1.06056e-14	371	371
C6orf147	0.40405	5.29901e-16	1.06204e-14	371	178
SAPS1	0.403965	5.38045e-16	1.07404e-14	371	371
SOAT1	0.403536	5.81421e-16	1.15947e-14	371	371
ARMC3	0.403524	5.82629e-16	1.16071e-14	371	117
S100PBP	0.403414	5.94339e-16	1.18286e-14	371	371
ZNF587	0.403372	5.98815e-16	1.19058e-14	371	371
LYPD6	0.403325	6.03968e-16	1.19963e-14	371	322
OLA1	0.403021	6.37883e-16	1.26573e-14	371	371
GNB3	0.403008	6.39365e-16	1.26741e-14	371	317
PEG10	0.402961	6.44835e-16	1.27698e-14	371	371
ABCC5	0.402788	6.65228e-16	1.31215e-14	371	371
GLT25D1	0.402603	6.87691e-16	1.35377e-14	371	371
GPC2	0.402597	6.88494e-16	1.35402e-14	371	355
C10orf78	0.402562	6.92812e-16	1.35982e-14	371	371
TOP2B	0.402298	7.26387e-16	1.42292e-14	371	371
CEP110	0.401977	7.69464e-16	1.49993e-14	371	371
C10orf137	0.401429	8.48832e-16	1.64498e-14	371	371
TFRC	0.401414	8.51115e-16	1.64781e-14	371	371
PHF21A	0.40139	8.5484e-16	1.65341e-14	371	371
FAM49B	0.401312	8.66892e-16	1.67347e-14	371	371
PRPF38A	0.401272	8.73046e-16	1.68372e-14	371	371
DHX15	0.401204	8.83776e-16	1.70276e-14	371	371
NUP85	0.400874	9.37502e-16	1.80453e-14	371	371
UTP18	0.400741	9.59981e-16	1.84602e-14	371	371
PAK4	0.400696	9.67671e-16	1.85762e-14	371	371
ORC2L	0.400695	9.6788e-16	1.85762e-14	371	371
STRBP	0.400681	9.70308e-16	1.86049e-14	371	371
BCAT1	0.40066	9.73983e-16	1.86574e-14	371	371
RALGAPB	0.400568	9.90127e-16	1.89302e-14	371	371
SLCO4C1	0.400551	9.93176e-16	1.89703e-14	371	341
DQX1	0.400542	9.94665e-16	1.89806e-14	371	249
TMEM120B	0.400508	1.00071e-15	1.90777e-14	371	371
HMGN1	0.400361	1.02729e-15	1.95657e-14	371	371
PDSS1	0.400184	1.06024e-15	2.01546e-14	371	371
LEPRE1	0.400096	1.07706e-15	2.04548e-14	371	371
FAM119A	0.400087	1.07876e-15	2.04676e-14	371	371
SFRS14	0.399948	1.10583e-15	2.09216e-14	371	371
DMBT1	0.399505	1.19643e-15	2.25712e-14	371	262
TRAF5	0.399235	1.25537e-15	2.36242e-14	371	371
ZNF37B	0.399123	1.28066e-15	2.40464e-14	371	371
ZNF100	0.399031	1.30171e-15	2.43957e-14	371	371
ZNF713	0.399001	1.3087e-15	2.45036e-14	371	370
ZNF761	0.398741	1.37033e-15	2.56095e-14	371	371
SFRS8	0.398244	1.49661e-15	2.7865e-14	371	371
ZNF695	0.397992	1.56491e-15	2.90551e-14	371	283
DMXL2	0.397694	1.64949e-15	3.05858e-14	371	371
MCRS1	0.397691	1.65042e-15	3.05858e-14	371	371
SSB	0.397677	1.65448e-15	3.06049e-14	371	371
ZNF202	0.397677	1.65453e-15	3.06049e-14	371	371
CCAR1	0.397635	1.66681e-15	3.08035e-14	371	371
LASS5	0.397576	1.68428e-15	3.10975e-14	371	371
ZNF664	0.397399	1.73769e-15	3.20539e-14	371	371
LYAR	0.397145	1.81751e-15	3.34953e-14	371	371
ZNF498	0.397137	1.82003e-15	3.35107e-14	371	371
MCOLN3	0.39695	1.8811e-15	3.46032e-14	371	312
CCDC150	0.396874	1.90652e-15	3.50385e-14	371	371
NONO	0.396787	1.93602e-15	3.55477e-14	371	371
CCDC97	0.396487	2.04084e-15	3.73005e-14	371	371
DBR1	0.396334	2.09659e-15	3.82788e-14	371	371
CNPY4	0.39633	2.09821e-15	3.82788e-14	371	371
ZNF708	0.39608	2.19258e-15	3.99275e-14	371	371
SCMH1	0.395797	2.30419e-15	4.19214e-14	371	371
ZNF131	0.395732	2.33049e-15	4.23614e-14	371	371
HSN2	0.395683	2.35068e-15	4.26893e-14	371	344
CLEC2D	0.395558	2.40283e-15	4.35968e-14	371	371
DVL2	0.395263	2.5306e-15	4.58165e-14	371	371
MARS	0.395221	2.54933e-15	4.60868e-14	371	371
FAM102B	0.395212	2.5532e-15	4.6115e-14	371	371
CNOT10	0.394997	2.6511e-15	4.77966e-14	371	371
SLC1A5	0.394959	2.66892e-15	4.8059e-14	371	371
DUSP9	0.394956	2.67048e-15	4.8059e-14	371	368
FLVCR1	0.394856	2.71748e-15	4.88607e-14	371	371
ZNF496	0.394687	2.79901e-15	5.02812e-14	371	371
ADNP	0.394586	2.84889e-15	5.11312e-14	371	371
SLC4A7	0.394544	2.8698e-15	5.14137e-14	371	371
VPS54	0.394401	2.94251e-15	5.2669e-14	371	371
EPB41L2	0.394366	2.96089e-15	5.29505e-14	371	371
TUBB	0.394269	3.0113e-15	5.38036e-14	371	371
RBBP7	0.394152	3.07349e-15	5.48656e-14	371	371
BUB3	0.393941	3.18879e-15	5.68221e-14	371	371
HN1	0.393927	3.19647e-15	5.6908e-14	371	371
ABHD3	0.3935	3.44371e-15	6.11458e-14	371	371
QTRTD1	0.393252	3.59591e-15	6.36779e-14	371	371
FIP1L1	0.393238	3.60487e-15	6.37799e-14	371	371
HIATL1	0.393225	3.61285e-15	6.38645e-14	371	371
C7orf23	0.393159	3.65478e-15	6.45484e-14	371	371
MGC57346	0.393082	3.70406e-15	6.53608e-14	371	371
CUZD1	0.392826	3.87244e-15	6.81508e-14	371	345
RCOR2	0.392702	3.95651e-15	6.95689e-14	371	334
PRR3	0.392584	4.03847e-15	7.09475e-14	371	371
ZBTB40	0.392387	4.17905e-15	7.32879e-14	371	371
RNF216L	0.392113	4.38294e-15	7.67284e-14	371	371
PSIP1	0.391813	4.6166e-15	8.0395e-14	371	371
PLAC1	0.391623	4.77145e-15	8.29466e-14	371	171
DENND4B	0.391431	4.93288e-15	8.56782e-14	371	371
DVWA	0.391424	4.93844e-15	8.57e-14	371	165
KDM1A	0.391347	5.00491e-15	8.67779e-14	371	371
CSRNP2	0.391283	5.06027e-15	8.75853e-14	371	371
NUPL2	0.391191	5.14172e-15	8.89179e-14	371	371
B4GALT4	0.391072	5.2481e-15	9.06789e-14	371	371
PPFIA4	0.390868	5.43723e-15	9.38652e-14	371	339
PNCK	0.390691	5.60553e-15	9.66869e-14	371	226
BFSP1	0.390573	5.72054e-15	9.85002e-14	371	371
C20orf117	0.390558	5.73534e-15	9.86696e-14	371	371
ZNF84	0.390553	5.74106e-15	9.86828e-14	371	371
CDC14A	0.390493	5.80005e-15	9.95251e-14	371	371
NUP93	0.390363	5.93147e-15	1.01693e-13	371	371
ENOPH1	0.390337	5.95901e-15	1.02077e-13	371	371
C7orf29	0.390286	6.01129e-15	1.02884e-13	371	371
ZNF714	0.390143	6.16066e-15	1.0535e-13	371	371
RIOK1	0.389892	6.43334e-15	1.0973e-13	371	371
ZNF675	0.389696	6.65343e-15	1.1329e-13	371	371
KIAA0406	0.389481	6.90422e-15	1.1746e-13	371	371
TRIM24	0.389302	7.12081e-15	1.20938e-13	371	371
ITGB3BP	0.38919	7.25886e-15	1.23178e-13	371	371
KRBA1	0.38915	7.3083e-15	1.23911e-13	371	370
PPIL5	0.38914	7.32082e-15	1.24018e-13	371	371
C12orf75	0.389071	7.40891e-15	1.25404e-13	371	371
DUSP12	0.388945	7.5702e-15	1.27916e-13	371	371
ADNP2	0.388888	7.64534e-15	1.28967e-13	371	371
ZNF70	0.388879	7.65603e-15	1.29039e-13	371	371
DLK2	0.388711	7.88038e-15	1.32708e-13	371	329
ZNF142	0.388303	8.45122e-15	1.41483e-13	371	371
RQCD1	0.388171	8.64459e-15	1.44478e-13	371	369
CCDC163P	0.387789	9.22702e-15	1.53696e-13	371	352
AACS	0.387601	9.52872e-15	1.58457e-13	371	371
CLIC1	0.387451	9.77642e-15	1.62305e-13	371	371
PLOD2	0.387341	9.96125e-15	1.65236e-13	371	371
TMEM48	0.387126	1.03336e-14	1.71127e-13	371	371
CCDC112	0.387109	1.03636e-14	1.7139e-13	371	370
IMPDH1	0.387107	1.03667e-14	1.7139e-13	371	371
OTUD3	0.387014	1.05327e-14	1.7399e-13	371	371
TPD52L2	0.386904	1.07315e-14	1.76981e-13	371	371
RUSC1	0.386878	1.07801e-14	1.77636e-13	371	371
EGLN3	0.38686	1.08127e-14	1.78026e-13	371	371
ZNF711	0.386578	1.13449e-14	1.8648e-13	371	364
RAD51C	0.386414	1.16665e-14	1.9145e-13	371	371
DTYMK	0.386379	1.17346e-14	1.9225e-13	371	371
LY6G5B	0.386302	1.1891e-14	1.94654e-13	371	370
EXOSC3	0.386251	1.1993e-14	1.96161e-13	371	371
ING3	0.386161	1.21779e-14	1.99022e-13	371	371
MMP12	0.386098	1.23107e-14	2.01028e-13	371	304
ZNF620	0.386019	1.24766e-14	2.03402e-13	371	371
GNPDA1	0.385985	1.25482e-14	2.04386e-13	371	371
ZNF384	0.385981	1.25574e-14	2.04386e-13	371	371
ZNF286A	0.385754	1.30494e-14	2.12047e-13	371	371
C10orf18	0.385734	1.30949e-14	2.12441e-13	371	371
CBFB	0.385553	1.35031e-14	2.18706e-13	371	371
C2orf15	0.385502	1.36199e-14	2.20241e-13	371	366
ASXL1	0.385247	1.42219e-14	2.29789e-13	371	371
REEP2	0.385223	1.42789e-14	2.30521e-13	371	364
SNRNP40	0.385018	1.47852e-14	2.37925e-13	371	371
PTPDC1	0.385008	1.48086e-14	2.38108e-13	371	371
CACYBP	0.384904	1.5073e-14	2.41969e-13	371	371
DPF2	0.384804	1.53303e-14	2.45902e-13	371	371
TMEM168	0.384678	1.56593e-14	2.50373e-13	371	371
LRRC37B2	0.38465	1.57337e-14	2.51244e-13	371	371
UGT8	0.384606	1.58528e-14	2.52858e-13	371	222
ZNF248	0.384424	1.63469e-14	2.60322e-13	371	371
HAT1	0.384282	1.67449e-14	2.66447e-13	371	371
INTS4	0.384161	1.70899e-14	2.7172e-13	371	371
C7orf70	0.384144	1.71377e-14	2.72263e-13	371	371
SPHK1	0.384138	1.71559e-14	2.72334e-13	371	371
LOC374443	0.384081	1.73218e-14	2.74748e-13	371	371
DPF1	0.383976	1.76309e-14	2.79429e-13	371	218
FOXK2	0.383925	1.77843e-14	2.8151e-13	371	371
NOP58	0.383923	1.77905e-14	2.8151e-13	371	371
ZNF789	0.383801	1.81583e-14	2.87102e-13	371	371
CTDSPL2	0.383683	1.85246e-14	2.92659e-13	371	371
SAP130	0.383524	1.90273e-14	2.9989e-13	371	371
HECTD2	0.383505	1.90881e-14	3.00374e-13	371	371
BZW2	0.383318	1.96989e-14	3.09741e-13	371	371
RINT1	0.383249	1.99274e-14	3.13086e-13	371	371
BTBD3	0.383219	2.00309e-14	3.14465e-13	371	371
CDK2AP1	0.383206	2.00747e-14	3.14904e-13	371	371
HLTF	0.383124	2.03509e-14	3.18485e-13	371	371
CRLF3	0.382952	2.09491e-14	3.27075e-13	371	371
PTMA	0.38264	2.20775e-14	3.43615e-13	371	371
SERPINH1	0.382558	2.2382e-14	3.48083e-13	371	371
BCL9	0.382377	2.30732e-14	3.58553e-13	371	371
UBAP2L	0.382294	2.33965e-14	3.63117e-13	371	371
STOX1	0.382292	2.34034e-14	3.63117e-13	371	357
FABP5	0.382271	2.3486e-14	3.63833e-13	371	371
VWA5B2	0.382252	2.35648e-14	3.64768e-13	371	324
LOC127841	0.382189	2.38127e-14	3.68321e-13	371	318
DRAM1	0.382085	2.42326e-14	3.74233e-13	371	371
ADORA2B	0.381924	2.48952e-14	3.83871e-13	371	367
SAP30	0.381727	2.57312e-14	3.96455e-13	371	371
C1orf106	0.381681	2.59277e-14	3.9897e-13	371	367
DGKD	0.38168	2.59344e-14	3.9897e-13	371	371
CSNK1G1	0.381675	2.59546e-14	3.98973e-13	371	371
BRD9	0.381647	2.60756e-14	4.00523e-13	371	371
CBL	0.381402	2.71686e-14	4.16669e-13	371	371
ANKRD7	0.381345	2.74286e-14	4.20333e-13	371	107
ZNF605	0.38122	2.80078e-14	4.2822e-13	371	371
C12orf4	0.381085	2.86468e-14	4.3665e-13	371	371
C19orf48	0.381085	2.86468e-14	4.3665e-13	371	371
TTLL5	0.380932	2.9389e-14	4.47621e-13	371	371
NUP160	0.380829	2.98954e-14	4.54415e-13	371	371
ACRV1	0.380828	2.99035e-14	4.54415e-13	371	220
DDX23	0.380638	3.08648e-14	4.68665e-13	371	371
ZNF738	0.380457	3.18117e-14	4.82308e-13	371	371
TIA1	0.380141	3.35289e-14	5.0757e-13	371	371
C1orf113	0.379688	3.61524e-14	5.4687e-13	371	371
MDM1	0.379542	3.70439e-14	5.5993e-13	371	371
C12orf11	0.379506	3.72658e-14	5.62857e-13	371	371
PRMT1	0.379445	3.7646e-14	5.68169e-13	371	371
C5orf54	0.379387	3.8007e-14	5.72847e-13	371	371
PLEKHB1	0.379386	3.80135e-14	5.72847e-13	371	363
CDKN2C	0.379281	3.86838e-14	5.82508e-13	371	371
MRPL42	0.379249	3.88881e-14	5.847e-13	371	371
C18orf10	0.379241	3.89439e-14	5.85099e-13	371	371
WSB1	0.379229	3.90166e-14	5.85748e-13	371	371
TPM3	0.379164	3.94409e-14	5.91227e-13	371	371
LSM11	0.379145	3.95666e-14	5.92666e-13	371	371
C12orf24	0.378762	4.21626e-14	6.30603e-13	371	371
PDCD7	0.378721	4.24505e-14	6.34432e-13	371	371
IKBKE	0.378705	4.25604e-14	6.35598e-13	371	371
STX3	0.378568	4.35379e-14	6.49709e-13	371	371
CASC5	0.378477	4.41961e-14	6.58296e-13	371	371
SOX12	0.378472	4.42341e-14	6.58296e-13	371	371
EDC3	0.378468	4.42633e-14	6.58296e-13	371	371
SSTR3	0.378466	4.42785e-14	6.58296e-13	371	145
LPCAT1	0.378433	4.45252e-14	6.6147e-13	371	371
ZNF639	0.378389	4.48463e-14	6.65249e-13	371	371
C19orf26	0.378334	4.5257e-14	6.70841e-13	371	333
SIPA1L3	0.378296	4.55447e-14	6.74603e-13	371	371
SKA2	0.378203	4.62509e-14	6.84047e-13	371	371
SMPDL3B	0.378004	4.77948e-14	7.05833e-13	371	350
C2orf48	0.377927	4.84089e-14	7.13843e-13	371	328
AFP	0.377901	4.8618e-14	7.16397e-13	371	366
RRP1B	0.377887	4.87268e-14	7.17468e-13	371	371
ZNF589	0.377741	4.99202e-14	7.33956e-13	371	371
LBR	0.377728	5.00274e-14	7.34989e-13	371	371
INPP5F	0.377613	5.09886e-14	7.48007e-13	371	371
VPS37C	0.377596	5.11332e-14	7.49578e-13	371	371
KLHDC8A	0.37759	5.11779e-14	7.49681e-13	371	291
MPZL1	0.377583	5.12397e-14	7.50035e-13	371	371
CLDN18	0.377422	5.26178e-14	7.69641e-13	371	244
ACYP1	0.377387	5.29242e-14	7.73556e-13	371	371
TAF5	0.377257	5.40663e-14	7.89669e-13	371	371
CXorf57	0.377213	5.44675e-14	7.94947e-13	371	371
NKX3-2	0.377097	5.55186e-14	8.09693e-13	371	239
AZI1	0.377042	5.60178e-14	8.1578e-13	371	371
ZNF367	0.377035	5.60804e-14	8.16095e-13	371	371
NT5DC2	0.376862	5.7703e-14	8.38482e-13	371	371
RBM15B	0.376852	5.78017e-14	8.39305e-13	371	371
GABPB1	0.376767	5.86124e-14	8.49838e-13	371	371
IFT52	0.376758	5.8706e-14	8.50576e-13	371	371
LRRC37B	0.376752	5.8762e-14	8.50767e-13	371	371
SLC6A14	0.376673	5.95302e-14	8.61264e-13	371	148
DSG2	0.376666	5.96005e-14	8.61655e-13	371	371
VANGL1	0.376529	6.09534e-14	8.80575e-13	371	371
ANKRD26	0.376351	6.27705e-14	9.0617e-13	371	371
IFT80	0.376173	6.46242e-14	9.3158e-13	371	371
CDK5R1	0.376056	6.58782e-14	9.4897e-13	371	371
BMF	0.376051	6.59336e-14	9.49082e-13	371	371
SMC1B	0.375953	6.70107e-14	9.6389e-13	371	320
RNF145	0.375817	6.85128e-14	9.84074e-13	371	371
DCUN1D5	0.375682	7.00536e-14	1.00548e-12	371	371
UNG	0.375645	7.04776e-14	1.01084e-12	371	371
CTNND2	0.375636	7.05856e-14	1.01166e-12	371	283
ZNF101	0.375589	7.1131e-14	1.01874e-12	371	371
C20orf96	0.375491	7.22831e-14	1.03376e-12	371	371
EHMT2	0.375447	7.28044e-14	1.04047e-12	371	371
YKT6	0.375062	7.75388e-14	1.10654e-12	371	371
DDR1	0.375049	7.7702e-14	1.10728e-12	371	371
ZBED5	0.375002	7.83015e-14	1.11423e-12	371	371
NT5C3	0.374959	7.8854e-14	1.12129e-12	371	371
ADO	0.37475	8.15997e-14	1.15951e-12	371	371
ANAPC1	0.374657	8.28493e-14	1.17642e-12	371	371
C9orf109	0.374589	8.37804e-14	1.1888e-12	371	333
GCNT1	0.374138	9.01714e-14	1.27857e-12	371	371
PAQR4	0.373989	9.23934e-14	1.30829e-12	371	371
PIK3R2	0.37394	9.31275e-14	1.31768e-12	371	371
PITX1	0.373906	9.36512e-14	1.3232e-12	371	323
CCT6P1	0.373882	9.40235e-14	1.32752e-12	371	371
ZMYM1	0.37381	9.51246e-14	1.33927e-12	371	371
RBM25	0.373553	9.91934e-14	1.39397e-12	371	371
LUC7L2	0.373147	1.05972e-13	1.48779e-12	371	371
GIT2	0.373038	1.07863e-13	1.51221e-12	371	371
ANKRD13D	0.372933	1.09713e-13	1.5349e-12	371	371
KDM5C	0.372724	1.13503e-13	1.5857e-12	371	371
ANAPC5	0.372552	1.16704e-13	1.62873e-12	371	371
NIF3L1	0.37255	1.16747e-13	1.62873e-12	371	371
AGFG1	0.372532	1.17084e-13	1.63229e-12	371	371
LOC642846	0.372337	1.20851e-13	1.68363e-12	371	371
MMP1	0.372313	1.21318e-13	1.68895e-12	371	345
MYLK2	0.3723	1.21583e-13	1.69146e-12	371	320
ADPGK	0.371933	1.29024e-13	1.7875e-12	371	371
SSH2	0.371868	1.30384e-13	1.80508e-12	371	371
UHRF2	0.371858	1.30607e-13	1.80691e-12	371	371
C3orf52	0.37168	1.3442e-13	1.85708e-12	371	330
DDX27	0.371506	1.38258e-13	1.90878e-12	371	371
CSPG5	0.371486	1.38706e-13	1.91365e-12	371	367
HNRNPM	0.37135	1.41775e-13	1.95328e-12	371	371
ZIC5	0.371334	1.42146e-13	1.95685e-12	371	307
RFXAP	0.371298	1.42984e-13	1.96585e-12	371	371
KPNA4	0.371255	1.43972e-13	1.97671e-12	371	371
SCLT1	0.371236	1.44423e-13	1.98154e-12	371	371
BICD1	0.370593	1.60195e-13	2.1934e-12	371	367
XRCC1	0.370415	1.64866e-13	2.25427e-12	371	371
SLC6A15	0.370402	1.65202e-13	2.2573e-12	371	99
ZNF567	0.370313	1.67602e-13	2.28697e-12	371	370
CLEC2L	0.370255	1.69169e-13	2.30386e-12	371	196
TBC1D22B	0.370254	1.69187e-13	2.30386e-12	371	371
KCNG3	0.370176	1.7132e-13	2.33131e-12	371	119
MOBKL3	0.370125	1.7273e-13	2.34889e-12	371	371
RNF219	0.370006	1.76084e-13	2.39287e-12	371	371
PYGO2	0.369993	1.76452e-13	2.39624e-12	371	371
RTTN	0.36989	1.79398e-13	2.43127e-12	371	371
IGSF3	0.369799	1.82031e-13	2.46527e-12	371	371
KIAA1586	0.369638	1.86787e-13	2.52626e-12	371	371
PSPC1	0.369568	1.88904e-13	2.55315e-12	371	371
PTPN2	0.369555	1.89312e-13	2.55692e-12	371	371
DHX57	0.369531	1.90036e-13	2.56497e-12	371	371
PNMA1	0.369499	1.91029e-13	2.57663e-12	371	371
YEATS4	0.369462	1.92158e-13	2.59011e-12	371	371
EFTUD2	0.369234	1.99307e-13	2.68465e-12	371	371
UPK3A	0.369205	2.00244e-13	2.69545e-12	371	305
ANKLE1	0.36913	2.02661e-13	2.72614e-12	371	365
SMS	0.368889	2.10647e-13	2.83011e-12	371	371
C3orf21	0.368888	2.10675e-13	2.83011e-12	371	371
CAPZA1	0.368724	2.16272e-13	2.9014e-12	371	371
ZNF681	0.368695	2.17304e-13	2.91328e-12	371	369
TFAP2E	0.368668	2.18228e-13	2.92351e-12	371	359
POLR2D	0.368664	2.18361e-13	2.92351e-12	371	371
ADAM17	0.368597	2.20712e-13	2.95301e-12	371	371
ME2	0.368503	2.24059e-13	2.99577e-12	371	371
ELOVL7	0.368481	2.24871e-13	3.00462e-12	371	365
C5orf13	0.368476	2.2504e-13	3.00485e-12	371	371
GEN1	0.368468	2.25327e-13	3.00667e-12	371	371
TTC13	0.368384	2.28366e-13	3.04518e-12	371	371
CNOT2	0.368336	2.30143e-13	3.06682e-12	371	371
MKRN2	0.368187	2.35689e-13	3.13863e-12	371	371
ZNF283	0.368158	2.36772e-13	3.15095e-12	371	370
TTC26	0.368137	2.37579e-13	3.15958e-12	371	369
TEX15	0.367842	2.49024e-13	3.30737e-12	371	142
PTPN12	0.367689	2.55169e-13	3.38673e-12	371	371
PTTG2	0.367215	2.75222e-13	3.63834e-12	371	220
GIT1	0.367209	2.75486e-13	3.63941e-12	371	371
MED12	0.367184	2.76553e-13	3.65108e-12	371	371
PPP4R1	0.367109	2.79907e-13	3.68803e-12	371	371
NCOA6	0.367101	2.80227e-13	3.68981e-12	371	371
TNFRSF11A	0.367008	2.8443e-13	3.7402e-12	371	369
ZNF445	0.366868	2.90849e-13	3.81958e-12	371	371
LOC81691	0.366749	2.96372e-13	3.88954e-12	371	371
C1orf65	0.366503	3.08213e-13	4.03431e-12	371	158
SLC22A15	0.366064	3.30457e-13	4.3198e-12	371	364
ELOVL4	0.366039	3.3174e-13	4.33373e-12	371	352
CCDC66	0.365661	3.52246e-13	4.59557e-12	371	371
MICB	0.365573	3.57169e-13	4.6537e-12	371	371
USP42	0.365542	3.58961e-13	4.674e-12	371	371
GNL3	0.365407	3.66713e-13	4.77182e-12	371	371
SPIN1	0.365381	3.68181e-13	4.78779e-12	371	371
CAPG	0.365317	3.71964e-13	4.83383e-12	371	371
HMGXB4	0.365158	3.81419e-13	4.95347e-12	371	371
PPP2R2B	0.364984	3.92046e-13	5.08816e-12	371	364
PIGS	0.364825	4.02024e-13	5.21428e-12	371	371
IGDCC4	0.364781	4.04832e-13	5.24728e-12	371	345
ZCCHC8	0.364716	4.09024e-13	5.29817e-12	371	371
SMC3	0.364395	4.30232e-13	5.55482e-12	371	371
MTA3	0.364303	4.36546e-13	5.62905e-12	371	371
SPATS2L	0.364271	4.38726e-13	5.65349e-12	371	371
AP1S3	0.364247	4.40393e-13	5.66892e-12	371	371
IPO9	0.364246	4.40492e-13	5.66892e-12	371	371
ZNF525	0.364014	4.56879e-13	5.87601e-12	371	370
FAM81A	0.363894	4.65578e-13	5.97632e-12	371	367
PFAS	0.363878	4.66793e-13	5.98421e-12	371	371
MAP3K4	0.363775	4.74431e-13	6.0782e-12	371	371
LSM14A	0.363354	5.06834e-13	6.48084e-12	371	371
HACE1	0.36321	5.18494e-13	6.62144e-12	371	370
CCDC109B	0.363068	5.30142e-13	6.76151e-12	371	370
TATDN2	0.362973	5.38136e-13	6.85908e-12	371	371
FNDC3B	0.362867	5.47178e-13	6.96988e-12	371	371
MARCKSL1	0.362779	5.54767e-13	7.05752e-12	371	371
ENO2	0.362522	5.77567e-13	7.33351e-12	371	371
ATP1A1	0.362374	5.91103e-13	7.49583e-12	371	371
SFRS13A	0.36233	5.95179e-13	7.54272e-12	371	371
ACLY	0.362298	5.98128e-13	7.57166e-12	371	371
ZKSCAN5	0.362297	5.98222e-13	7.57166e-12	371	371
C6orf192	0.362118	6.1523e-13	7.78197e-12	371	371
RAP2B	0.362069	6.19941e-13	7.83659e-12	371	371
MALT1	0.361943	6.32355e-13	7.98844e-12	371	371
EWSR1	0.361855	6.4113e-13	8.09416e-12	371	371
HEATR6	0.361839	6.42739e-13	8.10933e-12	371	371
TRNP1	0.361819	6.44706e-13	8.12901e-12	371	371
DMBX1	0.361797	6.46948e-13	8.15212e-12	371	187
HDAC1	0.361674	6.59434e-13	8.29896e-12	371	371
FAM57A	0.361504	6.77176e-13	8.51685e-12	371	371
CBLL1	0.361482	6.79598e-13	8.53654e-12	371	371
SP4	0.361462	6.81639e-13	8.55678e-12	371	371
E2F5	0.361321	6.96882e-13	8.74262e-12	371	370
CHKA	0.361142	7.16578e-13	8.98406e-12	371	371
TNFSF4	0.361086	7.22872e-13	9.05727e-12	371	371
POFUT2	0.360903	7.43793e-13	9.30719e-12	371	371
SRPK2	0.360744	7.62362e-13	9.51019e-12	371	371
MTHFD1L	0.360523	7.89082e-13	9.83736e-12	371	371
ZBTB9	0.360392	8.05277e-13	1.0033e-11	371	371
SNHG3	0.360296	8.17486e-13	1.01787e-11	371	371
CCT8	0.360288	8.18422e-13	1.0184e-11	371	371
GTF2H1	0.360045	8.49989e-13	1.05636e-11	371	371
LOC341056	0.359941	8.6372e-13	1.07209e-11	371	370
POLE3	0.359768	8.87282e-13	1.09996e-11	371	371
PMCH	0.359753	8.89298e-13	1.10178e-11	371	214
ANKIB1	0.359659	9.02433e-13	1.11666e-11	371	371
SPIN3	0.359557	9.16804e-13	1.13304e-11	371	371
LOC493754	0.359481	9.27706e-13	1.1458e-11	371	371
PRPF40A	0.35946	9.30665e-13	1.14874e-11	371	371
MGC12982	0.359258	9.60279e-13	1.1831e-11	371	371
BCORL1	0.35912	9.81046e-13	1.20719e-11	371	371
ASNS	0.359095	9.84776e-13	1.21103e-11	371	371
RAVER2	0.359089	9.85794e-13	1.21146e-11	371	371
PCNP	0.359085	9.86344e-13	1.21146e-11	371	371
KHDC1	0.358987	1.00147e-12	1.22928e-11	371	278
ITPR3	0.358979	1.00262e-12	1.22994e-11	371	371
RP9P	0.35889	1.01655e-12	1.24549e-11	371	371
FBXO46	0.35888	1.01813e-12	1.24666e-11	371	371
C3orf26	0.358718	1.04393e-12	1.27668e-11	371	371
DIP2B	0.358534	1.07403e-12	1.31028e-11	371	371
FAM118A	0.35847	1.08476e-12	1.32256e-11	371	371
ZNF718	0.358431	1.09125e-12	1.32966e-11	371	370
CSNK2A1	0.358283	1.11652e-12	1.35961e-11	371	371
TCP10L2	0.358245	1.12312e-12	1.36682e-11	371	185
TIGD1	0.358199	1.13117e-12	1.37409e-11	371	371
C1QL4	0.358165	1.13715e-12	1.38052e-11	371	283
RNF39	0.358093	1.14981e-12	1.39334e-11	371	340
MITD1	0.357979	1.17015e-12	1.41713e-11	371	371
KCTD17	0.357945	1.17627e-12	1.42281e-11	371	371
GPR84	0.35786	1.19183e-12	1.43988e-11	371	328
CHPF2	0.35746	1.26762e-12	1.52866e-11	371	371
ARMC8	0.357366	1.28601e-12	1.5499e-11	371	371
MAML1	0.357299	1.29945e-12	1.56515e-11	371	371
IKZF4	0.357278	1.30361e-12	1.56922e-11	371	371
NRSN2	0.357199	1.31943e-12	1.5873e-11	371	371
NOL10	0.357085	1.34287e-12	1.61258e-11	371	371
C2orf44	0.357035	1.35317e-12	1.62397e-11	371	371
LCTL	0.356989	1.36278e-12	1.63451e-11	371	272
ITGA5	0.356985	1.36365e-12	1.63458e-11	371	371
TTYH3	0.356902	1.38122e-12	1.65465e-11	371	371
FTSJ2	0.356878	1.38632e-12	1.65975e-11	371	371
POLE	0.356845	1.39331e-12	1.66712e-11	371	371
NAA50	0.356799	1.40325e-12	1.67699e-11	371	371
GNPDA2	0.356693	1.42613e-12	1.70151e-11	371	371
POC1A	0.356692	1.42633e-12	1.70151e-11	371	371
PAK1IP1	0.356339	1.50573e-12	1.79433e-11	371	371
FAM24B	0.356338	1.50593e-12	1.79433e-11	371	356
PCLO	0.356263	1.5234e-12	1.81406e-11	371	267
RASSF3	0.356236	1.52968e-12	1.81936e-11	371	364
ADAT2	0.356034	1.57788e-12	1.87445e-11	371	371
CASP8AP2	0.356014	1.58268e-12	1.87903e-11	371	371
YTHDF1	0.35598	1.591e-12	1.88667e-11	371	371
ZMYM4	0.35595	1.59824e-12	1.89412e-11	371	371
MARK2	0.355911	1.60785e-12	1.90324e-11	371	371
EEF1E1	0.355576	1.6924e-12	1.99618e-11	371	371
MSI1	0.355572	1.69338e-12	1.99618e-11	371	364
UBE2O	0.355483	1.7167e-12	2.02248e-11	371	371
KIAA0947	0.35517	1.80054e-12	2.11874e-11	371	371
RNMT	0.35497	1.85636e-12	2.18185e-11	371	371
TNRC18	0.354902	1.8757e-12	2.20328e-11	371	371
FAM111A	0.354871	1.8848e-12	2.21267e-11	371	371
FAM164A	0.354734	1.92457e-12	2.25802e-11	371	371
FER1L5	0.35459	1.96718e-12	2.30665e-11	371	223
LOC284023	0.354538	1.98293e-12	2.3224e-11	371	371
RHEBL1	0.35436	2.0373e-12	2.38468e-11	371	371
HPDL	0.354293	2.05827e-12	2.4078e-11	371	356
TGIF2	0.354229	2.0785e-12	2.42862e-11	371	371
PITX2	0.354133	2.10901e-12	2.46282e-11	371	169
BAK1	0.354111	2.11599e-12	2.46953e-11	371	371
PIAS3	0.35401	2.14878e-12	2.50339e-11	371	371
LAPTM4B	0.35377	2.2285e-12	2.59172e-11	371	371
DDX46	0.353603	2.28578e-12	2.65524e-11	371	371
PTPN23	0.353536	2.30939e-12	2.68059e-11	371	371
CLGN	0.353533	2.3103e-12	2.68059e-11	371	363
LOC642852	0.35346	2.33606e-12	2.70891e-11	371	371
HMGN4	0.353396	2.35889e-12	2.73061e-11	371	371
PAPSS1	0.353215	2.42437e-12	2.80315e-11	371	371
SYNCRIP	0.353114	2.462e-12	2.84336e-11	371	371
IGF2BP1	0.353104	2.46568e-12	2.84596e-11	371	329
GART	0.352899	2.54358e-12	2.93418e-11	371	371
DAZAP1	0.35282	2.57389e-12	2.96666e-11	371	371
ZNF878	0.352812	2.57723e-12	2.96784e-11	371	296
CREG2	0.352744	2.60374e-12	2.99664e-11	371	219
FAM200A	0.352678	2.62996e-12	3.02506e-11	371	371
LOC387646	0.35245	2.72217e-12	3.12751e-11	371	366
KCTD9	0.352376	2.75306e-12	3.16118e-11	371	371
C10orf119	0.352326	2.77368e-12	3.18302e-11	371	371
GCFC1	0.352288	2.78973e-12	3.1996e-11	371	371
GPRC5D	0.352218	2.81926e-12	3.2316e-11	371	342
PPPDE1	0.352149	2.84878e-12	3.26356e-11	371	371
CLCN2	0.3521	2.87014e-12	3.28614e-11	371	371
FAM116A	0.352066	2.88488e-12	3.30112e-11	371	371
CCNYL1	0.351942	2.93948e-12	3.36167e-11	371	371
C12orf65	0.351929	2.94512e-12	3.36619e-11	371	371
NR0B1	0.351891	2.96236e-12	3.38395e-11	371	146
ZNF397OS	0.35177	3.01678e-12	3.44217e-11	371	371
COG5	0.351676	3.05976e-12	3.48922e-11	371	371
GPD1L	0.351613	3.08903e-12	3.52057e-11	371	371
KDM3A	0.351374	3.20211e-12	3.6438e-11	371	371
GPRIN1	0.351373	3.20264e-12	3.6438e-11	371	371
RAB35	0.351324	3.22636e-12	3.6687e-11	371	371
ARMC9	0.351107	3.33379e-12	3.78654e-11	371	371
RANBP1	0.350841	3.46956e-12	3.93849e-11	371	371
PLEKHG4	0.350802	3.49023e-12	3.95723e-11	371	371
CASP5	0.350796	3.49327e-12	3.95723e-11	371	239
UBE2CBP	0.35066	3.56529e-12	4.03337e-11	371	371
ACBD7	0.350584	3.60661e-12	4.07317e-11	371	369
TRIM37	0.350542	3.62908e-12	4.09623e-11	371	371
SMARCB1	0.350481	3.66293e-12	4.1321e-11	371	371
RAD51L3	0.350345	3.73822e-12	4.21226e-11	371	371
CCDC59	0.350248	3.79329e-12	4.2719e-11	371	371
CCNK	0.350005	3.93397e-12	4.42283e-11	371	371
ATXN7L3	0.349853	4.0246e-12	4.51714e-11	371	371
ITPKA	0.34981	4.05067e-12	4.54378e-11	371	369
RAE1	0.349754	4.08433e-12	4.57896e-11	371	371
DFNA5	0.349571	4.19807e-12	4.70382e-11	371	371
ELF4	0.349563	4.20339e-12	4.70714e-11	371	371
IL4I1	0.349494	4.24662e-12	4.7502e-11	371	371
CDC27	0.349423	4.29205e-12	4.79833e-11	371	371
CDC42SE1	0.34934	4.34585e-12	4.85575e-11	371	371
PTHLH	0.349291	4.37778e-12	4.88595e-11	371	357
UNK	0.349206	4.43386e-12	4.94299e-11	371	371
PLEKHH2	0.349187	4.44652e-12	4.95434e-11	371	367
ZNF700	0.349105	4.50138e-12	5.00986e-11	371	371
BCL2L12	0.349067	4.52652e-12	5.03503e-11	371	371
NAALADL1	0.348828	4.69164e-12	5.20997e-11	371	371
MTMR7	0.34882	4.69714e-12	5.21317e-11	371	371
ZNF529	0.348607	4.84886e-12	5.37479e-11	371	371
SHOX2	0.348551	4.88956e-12	5.41467e-11	371	321
PRKRA	0.348469	4.94932e-12	5.47475e-11	371	371
2022-03-03	0.348429	4.97911e-12	5.50465e-11	371	370
ANKRD36	0.348167	5.17725e-12	5.71419e-11	371	371
PCYOX1L	0.348143	5.19567e-12	5.73135e-11	371	371
CCDC43	0.348114	5.21846e-12	5.7533e-11	371	371
CACNB1	0.348092	5.23525e-12	5.76862e-11	371	371
CCNI2	0.348049	5.26887e-12	5.80245e-11	371	333
C10orf91	0.348038	5.27798e-12	5.80928e-11	371	158
FAM60A	0.347858	5.42066e-12	5.95644e-11	371	371
TPR	0.347644	5.59639e-12	6.14616e-11	371	371
MXD1	0.34737	5.82931e-12	6.38787e-11	371	371
UXS1	0.347336	5.85824e-12	6.41604e-11	371	371
RECQL	0.347273	5.91313e-12	6.4726e-11	371	371
UNC119B	0.347129	6.04079e-12	6.60508e-11	371	371
NIPA2	0.346983	6.17322e-12	6.73879e-11	371	371
KIAA1949	0.346935	6.21766e-12	6.78359e-11	371	371
C6orf150	0.346768	6.37303e-12	6.94929e-11	371	362
C19orf47	0.346756	6.38517e-12	6.95491e-11	371	371
ST6GALNAC5	0.34658	6.55387e-12	7.12698e-11	371	269
C7orf31	0.346555	6.57763e-12	7.14891e-11	371	371
KREMEN2	0.346492	6.63936e-12	7.20731e-11	371	306
PNPT1	0.346489	6.64221e-12	7.20731e-11	371	371
LOC349114	0.346319	6.81192e-12	7.37538e-11	371	371
BRAP	0.346102	7.03354e-12	7.5947e-11	371	371
TPRKB	0.346042	7.09654e-12	7.65857e-11	371	371
ZNF280A	0.346035	7.10419e-12	7.66268e-11	371	105
UBE2Q2	0.346026	7.11305e-12	7.66809e-11	371	371
HEATR1	0.345851	7.29933e-12	7.84343e-11	371	371
POLR3F	0.345789	7.36659e-12	7.90717e-11	371	371
FANCA	0.345663	7.50494e-12	8.05134e-11	371	371
FHOD3	0.345651	7.51899e-12	8.06208e-11	371	360
PTBP2	0.345377	7.82865e-12	8.37606e-11	371	371
AP4E1	0.345359	7.85011e-12	8.39452e-11	371	371
DCAF7	0.34532	7.89465e-12	8.43761e-11	371	371
SNAP25	0.345167	8.07539e-12	8.62154e-11	371	357
DHX34	0.345161	8.08202e-12	8.62399e-11	371	371
TMEM60	0.34498	8.3e-12	8.84238e-11	371	371
TCP10	0.344834	8.48114e-12	9.02571e-11	371	165
JRKL	0.344747	8.59037e-12	9.1322e-11	371	371
LRIG3	0.344615	8.75868e-12	9.29793e-11	371	371
CDH10	0.344584	8.7983e-12	9.32835e-11	371	102
ZNF488	0.34441	9.02686e-12	9.56051e-11	371	266
ASAP1	0.344134	9.39987e-12	9.93971e-11	371	371
NDRG1	0.344104	9.44168e-12	9.97863e-11	371	371
GRM4	0.343991	9.59923e-12	1.0129e-10	371	184
WDR85	0.34391	9.71413e-12	1.02394e-10	371	371
NBEAL2	0.343749	9.94625e-12	1.04785e-10	371	371
ZNF607	0.343742	9.95606e-12	1.04833e-10	371	371
SLC29A2	0.343723	9.98407e-12	1.05073e-10	371	371
DHFR	0.343714	9.99791e-12	1.05163e-10	371	371
GLS	0.343488	1.03342e-11	1.08471e-10	371	371
ISL2	0.343451	1.03901e-11	1.09e-10	371	293
LOC80154	0.343303	1.06182e-11	1.11217e-10	371	371
PRAME	0.343236	1.07222e-11	1.12189e-10	371	243
CDK19	0.343111	1.0921e-11	1.14209e-10	371	371
KIAA1984	0.342984	1.11246e-11	1.16217e-10	371	367
HEATR2	0.34295	1.11807e-11	1.16741e-10	371	371
PPRC1	0.342704	1.15899e-11	1.20951e-10	371	371
PLCB3	0.34268	1.16305e-11	1.2131e-10	371	371
GTPBP3	0.342511	1.1922e-11	1.24156e-10	371	371
QPCT	0.342504	1.19332e-11	1.24208e-10	371	371
SFT2D1	0.342464	1.20027e-11	1.248e-10	371	371
TCTN2	0.342365	1.21774e-11	1.26551e-10	371	371
BCOR	0.342301	1.22931e-11	1.27687e-10	371	371
LOC256880	0.342272	1.23445e-11	1.28154e-10	371	321
ATP6V0D2	0.342246	1.23914e-11	1.28573e-10	371	340
ZNF239	0.342178	1.25154e-11	1.29793e-10	371	363
TUBD1	0.342147	1.25716e-11	1.30308e-10	371	371
SMARCA4	0.341949	1.29402e-11	1.3378e-10	371	371
FBF1	0.341871	1.30881e-11	1.35239e-10	371	371
PGS1	0.341818	1.31892e-11	1.36213e-10	371	371
COL9A2	0.341742	1.33356e-11	1.37561e-10	371	370
UTRN	0.341667	1.34822e-11	1.38951e-10	371	371
ZNF816A	0.341631	1.35524e-11	1.39603e-10	371	369
KCTD6	0.341594	1.36265e-11	1.40293e-10	371	371
RNF144A	0.341586	1.36424e-11	1.40368e-10	371	371
PDS5A	0.341583	1.36479e-11	1.40368e-10	371	371
STXBP5	0.341524	1.37656e-11	1.41506e-10	371	371
ZMYND19	0.341494	1.38252e-11	1.42045e-10	371	371
ZNF143	0.341485	1.38444e-11	1.42169e-10	371	371
DBNDD2	0.341481	1.38526e-11	1.4218e-10	371	371
SNRPF	0.341204	1.44207e-11	1.47934e-10	371	371
FAM118B	0.341135	1.45672e-11	1.49361e-10	371	371
FANCF	0.341089	1.46645e-11	1.50281e-10	371	371
CD24	0.340884	1.51062e-11	1.54569e-10	371	371
ZNF492	0.340663	1.55998e-11	1.59456e-10	371	264
MED28	0.340624	1.56885e-11	1.6028e-10	371	371
GNL3L	0.340549	1.58603e-11	1.61952e-10	371	371
MSH5	0.340482	1.60142e-11	1.63357e-10	371	371
OFD1	0.340422	1.61549e-11	1.64623e-10	371	371
SBF1	0.34039	1.62286e-11	1.65289e-10	371	371
RAP2A	0.340371	1.62736e-11	1.65663e-10	371	371
DDX20	0.340356	1.63082e-11	1.65931e-10	371	371
PDCL	0.340276	1.65001e-11	1.67638e-10	371	371
SNHG12	0.340275	1.65013e-11	1.67638e-10	371	371
ATP6V0A2	0.340202	1.66775e-11	1.69342e-10	371	371
CMTM7	0.340132	1.68477e-11	1.70983e-10	371	371
DSCR6	0.340115	1.68889e-11	1.71267e-10	371	336
TMEM44	0.340113	1.68928e-11	1.71267e-10	371	371
GJA3	0.340059	1.70246e-11	1.72515e-10	371	269
FANCL	0.340036	1.70822e-11	1.7301e-10	371	371
PPP1R12A	0.339638	1.8094e-11	1.82979e-10	371	371
TRIM45	0.339621	1.81395e-11	1.83346e-10	371	371
GNAZ	0.339475	1.85259e-11	1.87062e-10	371	371
PMS2L3	0.339411	1.86971e-11	1.88695e-10	371	371
ADAMTS6	0.339399	1.873e-11	1.88931e-10	371	363
SOX4	0.339296	1.90101e-11	1.9166e-10	371	371
SLC2A6	0.339182	1.93241e-11	1.94727e-10	371	371
PLXNC1	0.339139	1.94452e-11	1.95749e-10	371	361
FAM48A	0.338781	2.04759e-11	2.05502e-10	371	371
ADD3	0.338725	2.06419e-11	2.07063e-10	371	371
TBC1D12	0.338586	2.10586e-11	2.11137e-10	371	371
ZUFSP	0.338339	2.18195e-11	2.186e-10	371	371
ZNF286B	0.338338	2.18249e-11	2.186e-10	371	364
TMEM194B	0.338212	2.22239e-11	2.22261e-10	371	371
UIMC1	0.338095	2.26e-11	2.2591e-10	371	371
SMNDC1	0.338001	2.29068e-11	2.28861e-10	371	371
TRAF3	0.337929	2.31458e-11	2.31133e-10	371	371
BUD13	0.337806	2.35585e-11	2.35019e-10	371	371
MAST2	0.337768	2.36852e-11	2.36165e-10	371	371
HNRNPA0	0.337682	2.39804e-11	2.38988e-10	371	371
ADAM22	0.33737	2.50764e-11	2.49163e-10	371	299
ZBTB24	0.337292	2.53601e-11	2.51856e-10	371	371
RPL13P5	0.337172	2.57982e-11	2.55952e-10	371	367
ARHGAP18	0.337072	2.61714e-11	2.59494e-10	371	371
DCK	0.337069	2.61813e-11	2.59494e-10	371	371
ZNF14	0.336966	2.65716e-11	2.63101e-10	371	369
C17orf63	0.336924	2.6731e-11	2.64548e-10	371	371
FER1L4	0.33687	2.69364e-11	2.66448e-10	371	359
ABCF2	0.336852	2.70095e-11	2.66945e-10	371	371
COIL	0.336851	2.70134e-11	2.66945e-10	371	371
CCDC52	0.336807	2.71811e-11	2.68469e-10	371	371
DUSP5P	0.336754	2.73874e-11	2.70357e-10	371	267
CWC27	0.336751	2.73994e-11	2.70357e-10	371	371
CMTM1	0.336658	2.77688e-11	2.73866e-10	371	371
BTBD10	0.336538	2.82494e-11	2.78056e-10	371	371
BLMH	0.336501	2.83959e-11	2.79359e-10	371	371
BCL2L14	0.336377	2.89041e-11	2.83939e-10	371	355
ZNF292	0.336349	2.90217e-11	2.84953e-10	371	371
NCEH1	0.336212	2.95951e-11	2.9044e-10	371	371
FAM110A	0.3362	2.96436e-11	2.90773e-10	371	371
AP4M1	0.336142	2.9891e-11	2.92912e-10	371	371
POC5	0.33599	3.05468e-11	2.98897e-10	371	371
SLC30A8	0.335948	3.07304e-11	3.00398e-10	371	119
LHFPL2	0.335931	3.08032e-11	3.00962e-10	371	371
PAPOLA	0.335905	3.09167e-11	3.01923e-10	371	371
B3GALNT1	0.335845	3.11835e-11	3.04379e-10	371	370
HS2ST1	0.3357	3.18367e-11	3.10603e-10	371	371
GTF3C3	0.335491	3.27991e-11	3.19523e-10	371	371
FAM135A	0.335448	3.29962e-11	3.21285e-10	371	371
AP1G2	0.335315	3.36281e-11	3.2664e-10	371	371
FBXL18	0.335302	3.3693e-11	3.27111e-10	371	371
CEP170	0.335229	3.40446e-11	3.30364e-10	371	371
PAK6	0.33519	3.42308e-11	3.32009e-10	371	352
CSNK1E	0.33517	3.43285e-11	3.32794e-10	371	371
LAMP3	0.335034	3.49981e-11	3.38791e-10	371	371
KIAA1377	0.334797	3.61966e-11	3.50223e-10	371	366
RAB28	0.334778	3.6298e-11	3.51034e-10	371	371
NAA15	0.334626	3.70887e-11	3.57985e-10	371	371
MGAT4A	0.334606	3.71953e-11	3.58666e-10	371	371
SGCE	0.334602	3.72151e-11	3.58683e-10	371	371
SMYD5	0.334567	3.73983e-11	3.60275e-10	371	371
ELOVL3	0.334531	3.75926e-11	3.61972e-10	371	285
LIN28B	0.334505	3.77284e-11	3.63104e-10	371	148
SP8	0.334373	3.84435e-11	3.69807e-10	371	151
WRN	0.334348	3.85797e-11	3.70939e-10	371	371
P2RX4	0.334344	3.86008e-11	3.70962e-10	371	371
NUP35	0.334339	3.86263e-11	3.71028e-10	371	371
SMC6	0.334245	3.91443e-11	3.75461e-10	371	371
LPCAT4	0.3342	3.9398e-11	3.77531e-10	371	371
TEAD3	0.334055	4.02133e-11	3.84973e-10	371	371
C9orf45	0.334036	4.03242e-11	3.8585e-10	371	371
NAA38	0.334018	4.04249e-11	3.86627e-10	371	371
SLC1A4	0.334002	4.05194e-11	3.87345e-10	371	371
TES	0.33396	4.07595e-11	3.89453e-10	371	371
DFFB	0.333874	4.12554e-11	3.94003e-10	371	371
PLCB1	0.333781	4.18019e-11	3.99031e-10	371	371
DGKZ	0.333676	4.24306e-11	4.04838e-10	371	371
NOL11	0.333555	4.31601e-11	4.11404e-10	371	371
NXPH4	0.333518	4.33898e-11	4.13396e-10	371	368
ZBTB5	0.333501	4.3491e-11	4.14162e-10	371	371
FAM109A	0.333408	4.40672e-11	4.19249e-10	371	371
CKMT1B	0.333397	4.41376e-11	4.19718e-10	371	286
KDELC1	0.33337	4.43039e-11	4.21098e-10	371	371
NUAK1	0.333331	4.45513e-11	4.23248e-10	371	371
CCDC137	0.333165	4.56047e-11	4.32637e-10	371	371
MTERF	0.332841	4.77366e-11	4.52215e-10	371	371
SKIL	0.332795	4.80467e-11	4.5472e-10	371	371
ZNF709	0.332759	4.82952e-11	4.56855e-10	371	371
ZNF682	0.332572	4.95816e-11	4.68357e-10	371	370
YWHAZ	0.332557	4.96857e-11	4.69118e-10	371	371
PLXNA3	0.332458	5.03869e-11	4.75513e-10	371	371
TBP	0.332422	5.06428e-11	4.77702e-10	371	371
C1GALT1	0.332387	5.0889e-11	4.79797e-10	371	371
RAB39	0.332319	5.13789e-11	4.83958e-10	371	301
C2CD3	0.332248	5.18984e-11	4.87928e-10	371	371
DYM	0.332058	5.33038e-11	5.00905e-10	371	371
SEMA4D	0.332039	5.34454e-11	5.01999e-10	371	371
LOC723809	0.332014	5.36312e-11	5.03506e-10	371	219
ADSL	0.331862	5.47885e-11	5.13404e-10	371	371
CALCR	0.331855	5.48473e-11	5.13713e-10	371	245
SYNJ2	0.331845	5.49268e-11	5.14216e-10	371	371
GARS	0.331773	5.54782e-11	5.19134e-10	371	371
GTF2IRD1	0.331759	5.55944e-11	5.19977e-10	371	371
PMAIP1	0.331699	5.60596e-11	5.23591e-10	371	365
C6orf223	0.331616	5.67166e-11	5.29231e-10	371	311
CXCL5	0.331604	5.6817e-11	5.29919e-10	371	297
MIB1	0.331582	5.69885e-11	5.3127e-10	371	371
CWC22	0.331569	5.70942e-11	5.31927e-10	371	371
LLGL1	0.331567	5.71123e-11	5.31927e-10	371	371
PRR19	0.331562	5.71492e-11	5.32022e-10	371	370
STAG3L4	0.331553	5.72236e-11	5.32465e-10	371	371
SMAP1	0.331498	5.76648e-11	5.36321e-10	371	371
ENAH	0.331355	5.88325e-11	5.4667e-10	371	371
HNRNPC	0.331136	6.06713e-11	5.62183e-10	371	371
CYP19A1	0.331087	6.10823e-11	5.65465e-10	371	262
FUNDC1	0.33103	6.15787e-11	5.69796e-10	371	371
TIGD7	0.331006	6.17863e-11	5.71451e-10	371	371
C17orf86	0.330961	6.2169e-11	5.74191e-10	371	371
NCK2	0.330715	6.43482e-11	5.93493e-10	371	371
GSTCD	0.330711	6.43862e-11	5.93569e-10	371	371
NHLH2	0.330687	6.46013e-11	5.95276e-10	371	47
NID1	0.330682	6.46476e-11	5.95427e-10	371	371
DLX6	0.330635	6.50769e-11	5.99104e-10	371	144
IPO7	0.33061	6.53015e-11	6.00617e-10	371	371
STK17A	0.330582	6.55609e-11	6.02725e-10	371	371
PACSIN1	0.330343	6.77842e-11	6.22877e-10	371	364
SLC6A10P	0.33026	6.85727e-11	6.29832e-10	371	268
QSOX2	0.330228	6.8886e-11	6.32418e-10	371	371
RAD9A	0.330203	6.91231e-11	6.34303e-10	371	371
STARD3NL	0.330189	6.92597e-11	6.35263e-10	371	371
SH2B2	0.330164	6.94992e-11	6.36986e-10	371	371
NUP62CL	0.330163	6.95115e-11	6.36986e-10	371	349
FAM117B	0.330056	7.05565e-11	6.46265e-10	371	371
MAP3K7	0.329984	7.12674e-11	6.52177e-10	371	371
RIPK2	0.329961	7.14983e-11	6.53989e-10	371	371
SUPT7L	0.329887	7.22421e-11	6.6049e-10	371	371
NVL	0.329799	7.31381e-11	6.68068e-10	371	371
HMGXB3	0.329728	7.38632e-11	6.74383e-10	371	371
CDH24	0.329591	7.52867e-11	6.8675e-10	371	371
ZBTB26	0.329569	7.55214e-11	6.88576e-10	371	371
TCHP	0.329547	7.57439e-11	6.90289e-10	371	371
FAM189B	0.329468	7.65868e-11	6.97013e-10	371	371
PARP2	0.329429	7.7001e-11	7.00463e-10	371	371
TFDP1	0.329426	7.70362e-11	7.00463e-10	371	371
SEPHS1	0.329254	7.89018e-11	7.17099e-10	371	371
STK35	0.329165	7.9882e-11	7.25016e-10	371	371
MKKS	0.329122	8.03651e-11	7.29068e-10	371	371
ZNF318	0.329037	8.13235e-11	7.37091e-10	371	371
SP3	0.328917	8.26869e-11	7.48767e-10	371	371
FAM161A	0.328863	8.33168e-11	7.54129e-10	371	370
GRPEL2	0.328801	8.40289e-11	7.59884e-10	371	371
MMP10	0.328693	8.53052e-11	7.70377e-10	371	278
SENP5	0.328673	8.55428e-11	7.72172e-10	371	371
WDR82	0.328595	8.64709e-11	7.7985e-10	371	371
VPS26A	0.328458	8.81351e-11	7.93774e-10	371	371
BEX2	0.328275	9.04019e-11	8.13453e-10	371	353
ASPHD2	0.328086	9.2804e-11	8.34691e-10	371	370
CHST11	0.328032	9.34939e-11	8.40137e-10	371	371
EFHC2	0.328017	9.36847e-11	8.41473e-10	371	198
BMS1	0.327988	9.40604e-11	8.44467e-10	371	371
PRTFDC1	0.327701	9.78765e-11	8.76752e-10	371	371
BRAF	0.327653	9.85357e-11	8.8226e-10	371	371
BRI3BP	0.327615	9.90536e-11	8.86498e-10	371	371
NXT1	0.327605	9.91864e-11	8.87289e-10	371	371
TP53BP1	0.327575	9.9601e-11	8.90598e-10	371	371
PPT1	0.327341	1.0287e-10	9.19001e-10	371	371
PRDM13	0.327294	1.03545e-10	9.24621e-10	371	56
C19orf55	0.327153	1.0558e-10	9.41527e-10	371	371
SF3B4	0.326901	1.09326e-10	9.72321e-10	371	371
ZNF430	0.326895	1.09411e-10	9.72643e-10	371	359
GMEB1	0.326823	1.10496e-10	9.8185e-10	371	371
ZNF780B	0.32678	1.11155e-10	9.8726e-10	371	371
ANAPC4	0.326678	1.12736e-10	1.00041e-09	371	371
ARIH2	0.326674	1.12802e-10	1.00055e-09	371	371
SEMA4C	0.32657	1.1443e-10	1.01446e-09	371	371
CHD3	0.326567	1.14471e-10	1.01446e-09	371	371
NXPH2	0.326547	1.14785e-10	1.01679e-09	371	102
TAF1A	0.326438	1.16524e-10	1.03172e-09	371	369
UBN2	0.326435	1.16575e-10	1.03172e-09	371	371
C20orf20	0.326281	1.19074e-10	1.05243e-09	371	371
INTS7	0.32627	1.19255e-10	1.05357e-09	371	371
EMILIN2	0.326147	1.21282e-10	1.071e-09	371	371
MAMSTR	0.326116	1.21815e-10	1.07454e-09	371	370
AEBP2	0.326114	1.21844e-10	1.07454e-09	371	371
BAT2L2	0.326062	1.22722e-10	1.08132e-09	371	371
PLAUR	0.325965	1.24363e-10	1.09433e-09	371	371
RFX3	0.325911	1.25283e-10	1.10194e-09	371	368
VWDE	0.325902	1.2545e-10	1.10292e-09	371	169
BTG3	0.325894	1.25578e-10	1.10355e-09	371	371
USP28	0.325876	1.25892e-10	1.10583e-09	371	371
OGFRL1	0.325779	1.2759e-10	1.11926e-09	371	371
ELMO2	0.325748	1.28137e-10	1.12356e-09	371	371
THUMPD2	0.325692	1.2912e-10	1.13169e-09	371	371
CD101	0.325581	1.31106e-10	1.14822e-09	371	370
VBP1	0.32558	1.31121e-10	1.14822e-09	371	371
ZNF335	0.325575	1.31211e-10	1.1485e-09	371	371
C3orf17	0.325377	1.34825e-10	1.1791e-09	371	371
ACTR8	0.325328	1.35738e-10	1.18656e-09	371	371
USP21	0.325202	1.38099e-10	1.20562e-09	371	371
ZNF28	0.325063	1.40756e-10	1.22827e-09	371	369
NUDCD1	0.325039	1.41223e-10	1.2318e-09	371	371
ZNF257	0.325022	1.4155e-10	1.23412e-09	371	342
DLEU2L	0.324982	1.4232e-10	1.23974e-09	371	303
DLG3	0.324757	1.46786e-10	1.27698e-09	371	371
FBXL19	0.324689	1.48147e-10	1.28825e-09	371	371
ANKRD36B	0.32464	1.49148e-10	1.29617e-09	371	337
BTF3L4	0.324601	1.49945e-10	1.30219e-09	371	371
USP24	0.324496	1.52126e-10	1.32054e-09	371	371
LHFPL3	0.324362	1.54931e-10	1.34373e-09	371	154
WDR12	0.324299	1.56281e-10	1.35484e-09	371	371
FIGN	0.324216	1.58049e-10	1.36958e-09	371	367
PLEKHH1	0.324189	1.58644e-10	1.37413e-09	371	371
ZNF280C	0.324147	1.59558e-10	1.38085e-09	371	370
NR2C2AP	0.324104	1.605e-10	1.3878e-09	371	371
EXOG	0.324076	1.61113e-10	1.39189e-09	371	371
PLP2	0.323943	1.64068e-10	1.41619e-09	371	371
FBXO30	0.323876	1.65568e-10	1.4279e-09	371	371
SLC26A11	0.323784	1.6765e-10	1.44523e-09	371	371
ZNF532	0.32377	1.67969e-10	1.44736e-09	371	371
BOLL	0.323721	1.69101e-10	1.45648e-09	371	88
PPM1M	0.323528	1.73603e-10	1.49331e-09	371	371
MGA	0.323481	1.74717e-10	1.50225e-09	371	371
TFAM	0.323409	1.76448e-10	1.51648e-09	371	371
SLC25A40	0.323394	1.76813e-10	1.51896e-09	371	371
KATNA1	0.323113	1.83697e-10	1.57674e-09	371	371
CEP164	0.323099	1.84055e-10	1.57913e-09	371	371
NEURL3	0.32297	1.87323e-10	1.60579e-09	371	369
FZD1	0.32296	1.87568e-10	1.6072e-09	371	371
PCGF3	0.322905	1.8899e-10	1.61868e-09	371	371
ATP8B2	0.322834	1.90824e-10	1.63369e-09	371	371
HAVCR1	0.322824	1.91061e-10	1.63502e-09	371	246
CHD4	0.322797	1.91762e-10	1.64031e-09	371	371
PLA2G7	0.322772	1.92419e-10	1.64522e-09	371	371
RAI1	0.322685	1.94702e-10	1.66403e-09	371	371
ZNF12	0.322678	1.94895e-10	1.66497e-09	371	371
CIB2	0.322666	1.95208e-10	1.66693e-09	371	370
FAM171A2	0.322492	1.99886e-10	1.70541e-09	371	368
ISG20L2	0.322428	2.01635e-10	1.7196e-09	371	371
VEGFB	0.322404	2.02282e-10	1.72437e-09	371	371
PHF6	0.322363	2.03428e-10	1.7334e-09	371	371
EPPK1	0.322359	2.0354e-10	1.73361e-09	371	370
DEPDC4	0.322354	2.03653e-10	1.73383e-09	371	369
C1orf114	0.322319	2.04649e-10	1.74008e-09	371	328
NOLC1	0.322215	2.07539e-10	1.7639e-09	371	371
ZNF138	0.322147	2.09474e-10	1.77883e-09	371	371
ZNF845	0.321977	2.14347e-10	1.81789e-09	371	371
CTNNAL1	0.321815	2.19101e-10	1.85663e-09	371	371
KPNA5	0.321741	2.21315e-10	1.87459e-09	371	368
CEP290	0.321732	2.21574e-10	1.87599e-09	371	371
ATP13A2	0.32168	2.23149e-10	1.88772e-09	371	371
LRP8	0.321599	2.25598e-10	1.90682e-09	371	369
TFF2	0.321548	2.27155e-10	1.91916e-09	371	176
GMEB2	0.321513	2.28255e-10	1.92764e-09	371	371
CEP97	0.321505	2.28483e-10	1.92874e-09	371	371
MCM9	0.321486	2.29086e-10	1.93302e-09	371	371
ZNF586	0.321411	2.31421e-10	1.95189e-09	371	371
ACTR3	0.321213	2.37681e-10	2.00215e-09	371	371
LSM12	0.32113	2.4038e-10	2.02317e-09	371	371
CLEC5A	0.321029	2.43672e-10	2.04737e-09	371	332
RBM39	0.321026	2.43786e-10	2.04737e-09	371	371
GPC5	0.321022	2.43921e-10	2.04737e-09	371	305
XPO4	0.32102	2.43974e-10	2.04737e-09	371	371
METTL9	0.320861	2.49264e-10	2.08907e-09	371	371
CHRNA1	0.320858	2.49363e-10	2.08907e-09	371	249
PELI1	0.320811	2.50947e-10	2.10146e-09	371	371
GRK6	0.320784	2.5186e-10	2.10822e-09	371	371
TRIM31	0.320738	2.53442e-10	2.12057e-09	371	364
ZNF169	0.320714	2.54248e-10	2.12552e-09	371	371
PARG	0.320577	2.58994e-10	2.16429e-09	371	371
EIF4G2	0.320557	2.59714e-10	2.1694e-09	371	371
ZC3HAV1L	0.32053	2.60638e-10	2.17497e-09	371	311
C20orf112	0.320528	2.60708e-10	2.17497e-09	371	371
DNAJC5	0.320426	2.64316e-10	2.2023e-09	371	371
CDCP1	0.320369	2.66375e-10	2.21853e-09	371	370
NOL8	0.320364	2.66536e-10	2.21895e-09	371	371
C10orf81	0.320179	2.73261e-10	2.27208e-09	371	289
SLC35E4	0.320174	2.73464e-10	2.27235e-09	371	371
PLCG1	0.320172	2.73522e-10	2.27235e-09	371	371
STK24	0.320121	2.75413e-10	2.28616e-09	371	371
CA5BP	0.320077	2.7703e-10	2.29862e-09	371	371
INPP5J	0.320025	2.79e-10	2.31401e-09	371	366
TRIM65	0.319989	2.80348e-10	2.32325e-09	371	371
FAM126A	0.319906	2.83507e-10	2.34845e-09	371	371
SV2A	0.319805	2.87383e-10	2.37858e-09	371	371
NAA35	0.319576	2.96336e-10	2.44963e-09	371	371
HOXA11	0.319265	3.08963e-10	2.5519e-09	371	234
LRRC8B	0.319202	3.11607e-10	2.57266e-09	371	371
DPY19L2P1	0.319142	3.14113e-10	2.59082e-09	371	134
PRPF4	0.31914	3.14196e-10	2.59082e-09	371	371
PARP1	0.319132	3.14537e-10	2.59256e-09	371	371
AKAP8	0.319014	3.19549e-10	2.6306e-09	371	371
EPHX4	0.318893	3.24785e-10	2.6715e-09	371	343
SIX2	0.318878	3.25451e-10	2.67587e-09	371	331
C17orf69	0.31873	3.31931e-10	2.72802e-09	371	363
RHEB	0.318678	3.34263e-10	2.74606e-09	371	371
CHMP2B	0.31864	3.35969e-10	2.75878e-09	371	371
C5orf30	0.318637	3.36089e-10	2.75878e-09	371	371
SPAST	0.318508	3.41943e-10	2.80337e-09	371	371
SERPINI1	0.318448	3.44707e-10	2.82487e-09	371	371
ZNF284	0.318369	3.48359e-10	2.85362e-09	371	362
DCP1A	0.318345	3.49492e-10	2.86055e-09	371	371
LUZP6	0.318341	3.49669e-10	2.86082e-09	371	371
GPN1	0.318152	3.58651e-10	2.9331e-09	371	371
C1orf52	0.318143	3.59047e-10	2.93514e-09	371	371
C15orf39	0.318061	3.63043e-10	2.96537e-09	371	371
LOC339535	0.318001	3.65953e-10	2.98669e-09	371	206
HOXA6	0.317962	3.67834e-10	3.00082e-09	371	144
HIST1H3C	0.317894	3.71207e-10	3.02585e-09	371	293
ELAVL1	0.317841	3.73855e-10	3.04619e-09	371	371
YOD1	0.317784	3.76707e-10	3.06818e-09	371	371
MED22	0.317767	3.77572e-10	3.07396e-09	371	371
SNRPG	0.31772	3.79929e-10	3.09189e-09	371	371
RSRC1	0.317656	3.83199e-10	3.11595e-09	371	371
NCBP1	0.3176	3.86075e-10	3.13806e-09	371	371
TWF1	0.317589	3.86621e-10	3.14122e-09	371	371
SCARNA12	0.317553	3.8849e-10	3.15512e-09	371	358
GPR161	0.31754	3.89173e-10	3.15809e-09	371	371
ZNF594	0.317523	3.90014e-10	3.16265e-09	371	371
CHFR	0.317523	3.90053e-10	3.16265e-09	371	371
USP14	0.317496	3.91467e-10	3.17003e-09	371	371
ZNF300	0.317494	3.91548e-10	3.17003e-09	371	368
NAE1	0.317493	3.916e-10	3.17003e-09	371	371
ANO9	0.317188	4.07824e-10	3.29735e-09	371	366
RSBN1L	0.317156	4.09564e-10	3.31008e-09	371	371
SEMA4A	0.317089	4.13228e-10	3.33833e-09	371	371
ZNF710	0.316986	4.18976e-10	3.37792e-09	371	370
ACACA	0.316668	4.37056e-10	3.52084e-09	371	371
BEST1	0.316641	4.38632e-10	3.5321e-09	371	370
PLCE1	0.316539	4.44583e-10	3.57714e-09	371	371
CAPRIN1	0.316531	4.45071e-10	3.57935e-09	371	371
STXBP4	0.316529	4.45218e-10	3.57935e-09	371	371
C9orf80	0.316444	4.50217e-10	3.61662e-09	371	371
FBLIM1	0.316367	4.54889e-10	3.65268e-09	371	371
TPM4	0.316269	4.60799e-10	3.69865e-09	371	371
SNRPA	0.316242	4.62503e-10	3.71083e-09	371	371
SF3A2	0.31621	4.64429e-10	3.72478e-09	371	371
GALNT4	0.316126	4.69673e-10	3.76299e-09	371	371
MFN1	0.31612	4.69999e-10	3.76339e-09	371	371
OR13A1	0.316117	4.70191e-10	3.76342e-09	371	158
VGF	0.315988	4.78324e-10	3.82698e-09	371	225
ZNF267	0.315941	4.81299e-10	3.84923e-09	371	371
ZNF211	0.315734	4.94717e-10	3.94862e-09	371	371
TCF7L1	0.315714	4.96013e-10	3.95579e-09	371	371
SFI1	0.31561	5.02883e-10	4.00738e-09	371	371
FAM98B	0.315512	5.09433e-10	4.05795e-09	371	371
SUN1	0.315506	5.09845e-10	4.05961e-09	371	371
SYT1	0.31546	5.12936e-10	4.08095e-09	371	359
LOC285419	0.315425	5.15326e-10	4.09833e-09	371	291
RNF44	0.315403	5.16872e-10	4.10899e-09	371	371
TRIM17	0.315365	5.19425e-10	4.12764e-09	371	280
KRI1	0.315251	5.2735e-10	4.18727e-09	371	371
PALB2	0.315226	5.29069e-10	4.19925e-09	371	371
ATP1B3	0.315193	5.31411e-10	4.21616e-09	371	371
CDKAL1	0.315086	5.38956e-10	4.27262e-09	371	371
ZBED2	0.315069	5.40148e-10	4.28036e-09	371	296
GLI1	0.315044	5.41989e-10	4.29324e-09	371	366
SNX5	0.315016	5.43996e-10	4.30743e-09	371	371
TMEM43	0.314911	5.51527e-10	4.36533e-09	371	371
GPATCH1	0.314877	5.54038e-10	4.38346e-09	371	371
ZYX	0.314768	5.62044e-10	4.44327e-09	371	371
DCAF12	0.314763	5.62427e-10	4.44454e-09	371	371
LOC727896	0.314695	5.67523e-10	4.48109e-09	371	370
ILF2	0.314671	5.6931e-10	4.4918e-09	371	371
SFRS11	0.31464	5.71618e-10	4.50823e-09	371	371
AMIGO3	0.314611	5.73845e-10	4.524e-09	371	371
FNDC8	0.314437	5.8712e-10	4.62316e-09	371	354
TSPAN3	0.31441	5.89252e-10	4.63629e-09	371	371
IL11	0.314381	5.91471e-10	4.65191e-09	371	292
LOC100272146	0.314356	5.93472e-10	4.66581e-09	371	371
TUG1	0.314339	5.94805e-10	4.67444e-09	371	371
FRAS1	0.31429	5.98629e-10	4.70264e-09	371	362
PRR12	0.314231	6.03303e-10	4.73748e-09	371	371
KIAA0892	0.314218	6.04333e-10	4.7437e-09	371	371
HPSE	0.314187	6.068e-10	4.76119e-09	371	367
LAMB1	0.314122	6.12052e-10	4.79862e-09	371	371
DHDH	0.313922	6.28364e-10	4.91877e-09	371	337
TMEM209	0.313899	6.30198e-10	4.92925e-09	371	371
POU3F2	0.313884	6.3147e-10	4.93726e-09	371	146
C9orf30	0.313862	6.33316e-10	4.94975e-09	371	371
KLC2	0.313697	6.47235e-10	5.05458e-09	371	371
TARDBP	0.313645	6.51658e-10	5.08712e-09	371	371
CTRL	0.313572	6.57885e-10	5.13171e-09	371	366
TULP3	0.313541	6.60585e-10	5.15075e-09	371	371
UTP6	0.313434	6.69954e-10	5.22177e-09	371	371
ZNF461	0.3133	6.81827e-10	5.31014e-09	371	371
PPIL1	0.313076	7.02161e-10	5.46424e-09	371	371
NOP2	0.313047	7.04796e-10	5.48046e-09	371	371
CCDC45	0.312994	7.0972e-10	5.5166e-09	371	371
MLL	0.312972	7.11778e-10	5.52828e-09	371	371
C14orf143	0.312961	7.12826e-10	5.53427e-09	371	371
SERAC1	0.312909	7.17676e-10	5.56758e-09	371	371
PBRM1	0.312899	7.1868e-10	5.5732e-09	371	371
VIL1	0.312838	7.24395e-10	5.60878e-09	371	369
LCORL	0.3128	7.28045e-10	5.63485e-09	371	371
PGM2L1	0.312771	7.30836e-10	5.65426e-09	371	371
ARHGAP39	0.312746	7.33224e-10	5.66833e-09	371	371
NPM1	0.312656	7.41923e-10	5.73336e-09	371	371
NAA16	0.312608	7.46514e-10	5.76436e-09	371	371
TACR3	0.312599	7.47392e-10	5.7689e-09	371	25
YWHAH	0.312583	7.4899e-10	5.779e-09	371	371
THUMPD3	0.312393	7.67822e-10	5.92201e-09	371	371
CELF4	0.312202	7.87325e-10	6.07008e-09	371	334
AP3M2	0.312194	7.88083e-10	6.07358e-09	371	371
THOC5	0.312117	7.96016e-10	6.13234e-09	371	371
TAF3	0.312064	8.01586e-10	6.17286e-09	371	371
FGD6	0.311836	8.25779e-10	6.34935e-09	371	371
ARPC2	0.31179	8.30744e-10	6.38506e-09	371	371
ISY1	0.311783	8.31525e-10	6.3886e-09	371	371
GAL3ST1	0.311761	8.33971e-10	6.40246e-09	371	369
GLIS2	0.311644	8.46738e-10	6.49297e-09	371	371
RBM5	0.311625	8.4887e-10	6.50431e-09	371	371
LRRIQ1	0.311512	8.61443e-10	6.5981e-09	371	131
HIST1H2AH	0.311506	8.62133e-10	6.60085e-09	371	205
DNAJC10	0.311416	8.72351e-10	6.67139e-09	371	371
LOC441089	0.311233	8.93321e-10	6.82129e-09	371	371
UBE2I	0.311227	8.94052e-10	6.82425e-09	371	371
TRIM36	0.311205	8.96672e-10	6.84163e-09	371	369
PDZD7	0.311174	9.00199e-10	6.86591e-09	371	328
C7orf28A	0.311142	9.04031e-10	6.8925e-09	371	371
NDOR1	0.311074	9.12021e-10	6.95076e-09	371	371
C6orf64	0.311012	9.19451e-10	7.00203e-09	371	371
LOC440944	0.310971	9.24332e-10	7.03651e-09	371	371
TMEM39A	0.310732	9.53579e-10	7.25084e-09	371	371
MFSD10	0.310688	9.59003e-10	7.2893e-09	371	371
SLC38A1	0.310647	9.64097e-10	7.32243e-09	371	371
ZNF260	0.310603	9.6964e-10	7.36173e-09	371	371
SPAG8	0.310593	9.70907e-10	7.36854e-09	371	367
CCDC76	0.310578	9.72794e-10	7.38005e-09	371	371
EIF2S3	0.310404	9.94982e-10	7.54263e-09	371	371
HNRNPA1	0.310385	9.97465e-10	7.5557e-09	371	371
UAP1L1	0.310259	1.01397e-09	7.67489e-09	371	371
SMAGP	0.310225	1.01843e-09	7.704e-09	371	371
VPS13A	0.310221	1.01898e-09	7.704e-09	371	371
NMU	0.310198	1.02194e-09	7.72347e-09	371	70
ZNF883	0.31014	1.02973e-09	7.77643e-09	371	357
FAM113B	0.310054	1.04121e-09	7.86016e-09	371	371
ARHGAP19	0.309953	1.05492e-09	7.96062e-09	371	371
CDK5R2	0.309805	1.07539e-09	8.10898e-09	371	103
TWISTNB	0.309797	1.07653e-09	8.11317e-09	371	371
CCR8	0.309795	1.07676e-09	8.11317e-09	371	256
TUFT1	0.309781	1.07868e-09	8.12455e-09	371	371
AMMECR1	0.309755	1.08231e-09	8.14882e-09	371	371
CDKN2D	0.30973	1.08589e-09	8.17269e-09	371	371
GJB6	0.309677	1.09333e-09	8.2256e-09	371	213
CIZ1	0.309647	1.09764e-09	8.2549e-09	371	371
LOC220729	0.309622	1.10123e-09	8.27564e-09	371	371
FGD1	0.309606	1.10343e-09	8.28906e-09	371	371
PWP2	0.309592	1.10547e-09	8.30125e-09	371	371
PUS7L	0.309461	1.12428e-09	8.43614e-09	371	371
C12orf34	0.309428	1.12912e-09	8.46921e-09	371	371
KRTAP19-1	0.309322	1.14479e-09	8.58354e-09	371	27
TMEM165	0.309183	1.16546e-09	8.73522e-09	371	371
QRICH1	0.309169	1.16768e-09	8.74857e-09	371	371
SCG3	0.309166	1.16814e-09	8.74872e-09	371	241
NR2C1	0.309159	1.16906e-09	8.75233e-09	371	371
C1orf93	0.309054	1.18516e-09	8.86956e-09	371	371
MFF	0.308972	1.19771e-09	8.96009e-09	371	371
SLC35F2	0.30893	1.20429e-09	9.00594e-09	371	370
PMS2CL	0.308892	1.21016e-09	9.04645e-09	371	371
LTV1	0.308864	1.21444e-09	9.07507e-09	371	371
ADCY6	0.308849	1.21692e-09	9.08673e-09	371	371
CLEC6A	0.308822	1.2211e-09	9.11456e-09	371	89
RBBP4	0.308809	1.22324e-09	9.12445e-09	371	371
TSEN54	0.308808	1.22334e-09	9.12445e-09	371	371
RGS19	0.308774	1.22874e-09	9.16129e-09	371	371
WAC	0.308754	1.23182e-09	9.18082e-09	371	371
ANKRD27	0.308725	1.23646e-09	9.2085e-09	371	371
RIF1	0.30864	1.25015e-09	9.30347e-09	371	371
ZNF468	0.30856	1.26316e-09	9.39334e-09	371	371
KIRREL2	0.30854	1.26628e-09	9.41302e-09	371	204
PLEKHA9	0.308468	1.27814e-09	9.49765e-09	371	371
ZNF180	0.308441	1.28258e-09	9.52706e-09	371	371
LGALS14	0.308429	1.28451e-09	9.53786e-09	371	63
HTR3A	0.308294	1.3071e-09	9.69834e-09	371	204
FOXJ1	0.308159	1.33009e-09	9.85427e-09	371	319
DAND5	0.308042	1.35017e-09	9.99926e-09	371	304
DTX2	0.307999	1.35775e-09	1.00517e-08	371	371
GPR120	0.307864	1.38155e-09	1.02241e-08	371	273
CREB3L2	0.307661	1.41795e-09	1.04896e-08	371	371
WBP5	0.307618	1.42596e-09	1.05449e-08	371	371
MAK16	0.307612	1.42706e-09	1.05491e-08	371	371
NCOR2	0.307596	1.42985e-09	1.05658e-08	371	371
SUSD1	0.307501	1.44755e-09	1.06926e-08	371	371
TMEM106C	0.307408	1.46487e-09	1.08166e-08	371	371
NAP1L4	0.30734	1.47777e-09	1.09078e-08	371	371
SLC22A20	0.307225	1.4997e-09	1.10655e-08	371	339
SLFN13	0.307126	1.5189e-09	1.11989e-08	371	371
EYA1	0.307073	1.52917e-09	1.12705e-08	371	181
ARPC3	0.307056	1.53253e-09	1.12911e-08	371	371
LOC728643	0.307042	1.5353e-09	1.13073e-08	371	370
KLHL18	0.30697	1.54945e-09	1.14073e-08	371	371
GDAP1	0.306939	1.55559e-09	1.14483e-08	371	370
TRAM1L1	0.306887	1.56604e-09	1.1521e-08	371	333
ANP32B	0.30688	1.56736e-09	1.15221e-08	371	371
SGK494	0.306819	1.57967e-09	1.16083e-08	371	371
BTN2A1	0.306784	1.58688e-09	1.16527e-08	371	371
KIAA1468	0.306775	1.5887e-09	1.16618e-08	371	371
CCDC74B	0.30676	1.59168e-09	1.16786e-08	371	315
ZNF486	0.306753	1.5931e-09	1.16812e-08	371	330
SORCS1	0.306719	1.60013e-09	1.17284e-08	371	184
ALDH18A1	0.306538	1.63766e-09	1.19947e-08	371	371
CLSTN1	0.30647	1.65182e-09	1.20939e-08	371	371
CT45A5	0.306393	1.66821e-09	1.22094e-08	371	57
UNC119	0.306347	1.67804e-09	1.22769e-08	371	371
SNORD1C	0.306203	1.7093e-09	1.24827e-08	371	356
AMIGO2	0.305912	1.77406e-09	1.29461e-08	371	371
LYPD6B	0.305907	1.77514e-09	1.29492e-08	371	253
LRCH3	0.305833	1.79206e-09	1.30679e-08	371	371
CD276	0.305764	1.80777e-09	1.31776e-08	371	371
ZNF30	0.305655	1.83319e-09	1.3358e-08	371	371
MED14	0.30546	1.87921e-09	1.36734e-08	371	371
TGS1	0.305418	1.88942e-09	1.37426e-08	371	371
ZSCAN20	0.305309	1.9158e-09	1.39243e-08	371	371
TMEM51	0.305085	1.97118e-09	1.43216e-08	371	371
SMC1A	0.305076	1.97334e-09	1.43321e-08	371	371
C1orf77	0.305073	1.97408e-09	1.43322e-08	371	371
PIGU	0.305037	1.98334e-09	1.43942e-08	371	371
BRSK1	0.305012	1.98963e-09	1.44294e-08	371	371
PNN	0.304994	1.99415e-09	1.44566e-08	371	371
SPIB	0.304991	1.99483e-09	1.44566e-08	371	326
SMAD5	0.30498	1.99774e-09	1.44709e-08	371	371
C16orf93	0.304927	2.01108e-09	1.45531e-08	371	369
ZNF642	0.304756	2.05525e-09	1.4862e-08	371	371
RPRD1A	0.304585	2.10058e-09	1.51732e-08	371	371
TMPPE	0.304522	2.1174e-09	1.52892e-08	371	371
ZBTB11	0.304512	2.12021e-09	1.53034e-08	371	371
RMI1	0.304409	2.14808e-09	1.54827e-08	371	371
SLC16A3	0.304388	2.1537e-09	1.55175e-08	371	371
UBTD2	0.304273	2.18524e-09	1.57277e-08	371	371
TMEM184B	0.304199	2.20611e-09	1.58722e-08	371	371
SPDYA	0.304178	2.21177e-09	1.59072e-08	371	366
KRR1	0.304172	2.21342e-09	1.59089e-08	371	371
FNBP1	0.304163	2.21596e-09	1.59201e-08	371	371
USP36	0.303968	2.27148e-09	1.63131e-08	371	371
ZNF737	0.303945	2.2782e-09	1.63554e-08	371	370
KIAA0802	0.303884	2.29585e-09	1.64703e-08	371	371
GLYATL2	0.303854	2.30443e-09	1.65259e-08	371	152
CD2AP	0.30377	2.32926e-09	1.66919e-08	371	371
MMP11	0.303759	2.33247e-09	1.67089e-08	371	371
CROCCL2	0.303717	2.34492e-09	1.67921e-08	371	371
ZNF813	0.303675	2.35749e-09	1.6876e-08	371	359
SVOPL	0.303628	2.37139e-09	1.69694e-08	371	107
MTNR1B	0.303603	2.37891e-09	1.70171e-08	371	89
C1orf126	0.30359	2.38284e-09	1.70391e-08	371	318
OPN1SW	0.303561	2.39153e-09	1.70951e-08	371	303
CCDC120	0.303483	2.4155e-09	1.72603e-08	371	371
PNO1	0.303382	2.44638e-09	1.74621e-08	371	371
ZNF439	0.303368	2.45066e-09	1.74864e-08	371	370
CXorf61	0.303307	2.46968e-09	1.76158e-08	371	69
RNF2	0.303189	2.50673e-09	1.78673e-08	371	371
WEE1	0.303179	2.50995e-09	1.78838e-08	371	371
CANT1	0.303156	2.51713e-09	1.79222e-08	371	371
MAGED4B	0.303075	2.54306e-09	1.81003e-08	371	348
GEMIN5	0.303064	2.54674e-09	1.81201e-08	371	371
OXSR1	0.302966	2.57852e-09	1.83396e-08	371	371
TLK2	0.302956	2.58169e-09	1.83556e-08	371	371
ZNF146	0.302889	2.60343e-09	1.8497e-08	371	371
CDYL	0.302829	2.62322e-09	1.86309e-08	371	371
OBFC2B	0.302774	2.64145e-09	1.87538e-08	371	371
VEZT	0.302762	2.64558e-09	1.87764e-08	371	371
KIF5A	0.302684	2.6718e-09	1.89557e-08	371	156
METAP2	0.302663	2.67875e-09	1.89915e-08	371	371
ZIC2	0.302564	2.71239e-09	1.92176e-08	371	356
TDRD5	0.302561	2.71342e-09	1.92176e-08	371	164
FAM105A	0.302561	2.71353e-09	1.92176e-08	371	371
HNRNPK	0.302525	2.72597e-09	1.92988e-08	371	371
C6orf182	0.302433	2.7577e-09	1.95027e-08	371	371
GABRA3	0.302379	2.77636e-09	1.96276e-08	371	139
WHSC2	0.302353	2.7855e-09	1.96853e-08	371	371
EFCAB10	0.302298	2.80497e-09	1.98158e-08	371	352
LOC441666	0.302254	2.82044e-09	1.9918e-08	371	344
ZNF321	0.302251	2.82166e-09	1.99196e-08	371	363
DPH2	0.30217	2.85034e-09	2.01078e-08	371	371
CUL2	0.302082	2.88226e-09	2.03093e-08	371	371
ZPLD1	0.30208	2.88298e-09	2.03093e-08	371	222
SLC7A10	0.302034	2.89949e-09	2.04184e-08	371	264
HOXD11	0.301964	2.92518e-09	2.0592e-08	371	115
ZNF543	0.301824	2.97706e-09	2.09439e-08	371	371
HMSD	0.301824	2.97727e-09	2.09439e-08	371	184
LOC286467	0.301785	2.9919e-09	2.10394e-08	371	288
POU2AF1	0.301664	3.03782e-09	2.13473e-08	371	369
DENND5A	0.301609	3.05864e-09	2.14784e-08	371	371
CBX2	0.301589	3.06648e-09	2.15259e-08	371	371
ZBTB39	0.301558	3.07823e-09	2.16007e-08	371	371
PABPC4	0.301537	3.08661e-09	2.16519e-08	371	371
FBXO11	0.301528	3.09008e-09	2.16646e-08	371	371
PIGA	0.301511	3.09658e-09	2.16989e-08	371	371
LOC645166	0.301466	3.11416e-09	2.18145e-08	371	371
ZNF550	0.30144	3.12423e-09	2.18773e-08	371	371
ANKRD13B	0.301305	3.17759e-09	2.22432e-08	371	371
PRPF4B	0.301275	3.18963e-09	2.23196e-08	371	371
INPP4A	0.301238	3.20432e-09	2.24066e-08	371	371
ZFR	0.301232	3.20696e-09	2.24172e-08	371	371
C12orf49	0.301195	3.22185e-09	2.25134e-08	371	371
DLX6AS	0.301133	3.24678e-09	2.26638e-08	371	100
ZNF77	0.301122	3.25127e-09	2.26818e-08	371	371
EPHA5	0.301052	3.28007e-09	2.28721e-08	371	92
MYPN	0.30099	3.30581e-09	2.30355e-08	371	185
LOC285548	0.300969	3.31452e-09	2.3088e-08	371	85
C1orf187	0.300928	3.33136e-09	2.31972e-08	371	186
PPWD1	0.300924	3.3333e-09	2.32026e-08	371	371
TRIM33	0.300886	3.34904e-09	2.32959e-08	371	371
VOPP1	0.300866	3.35752e-09	2.33386e-08	371	371
PRKRIP1	0.300742	3.41016e-09	2.3688e-08	371	371
HNRNPUL2	0.30072	3.41946e-09	2.37443e-08	371	371
GPR160	0.300692	3.43119e-09	2.38156e-08	371	371
FNBP1L	0.30069	3.43211e-09	2.38156e-08	371	371
C9orf86	0.300575	3.4818e-09	2.41436e-08	371	371
2022-09-02	0.300509	3.51078e-09	2.43276e-08	371	371
FAM159A	0.300466	3.52972e-09	2.44503e-08	371	334
AAA1	0.300448	3.53781e-09	2.44978e-08	371	194
TNIK	0.300433	3.54449e-09	2.45355e-08	371	370
SLC39A6	0.300417	3.55125e-09	2.45738e-08	371	371
KIAA1522	0.300315	3.59709e-09	2.48666e-08	371	371
CPSF3	0.300314	3.5973e-09	2.48666e-08	371	371
SMURF2	0.300278	3.61369e-09	2.49712e-08	371	371
MBOAT7	0.300236	3.63288e-09	2.50951e-08	371	371
EHBP1L1	0.300018	3.73278e-09	2.57584e-08	371	371
CCDC88C	0.299734	3.86764e-09	2.66705e-08	371	371
[truncated: 10,539 more rows]
